# Supplementary material for: Enzymatic methyl sequencing detects DNA methylation at single-base resolution from picograms of DNA
Source: PubMed Central journal article supplement — Genome Res. 2021 Jul;31(7):1280–9. doi: 10.1101/gr.266551.120 (PMC8256858; doi:10.1101/gr.266551.120), 2021-07
Supplement: supp_gr.266551.120_Supplemental_Material_.pdf [file supp_gr.266551.120_Supplemental_Material_.pdf]

## Supplemental Material

Enzymatic methyl sequencing detects DNA methylation at single base resolution from picograms of DNA

Romualdas Vaisvila<sup>\*</sup>, V. K. Chaithanya Ponnaluri<sup>\*</sup>, Zhiyi Sun<sup>\*</sup>, Bradley W. Langhorst, Lana Saleh, Shengxi Guan, Nan Dai, Matthew A. Campbell, Brittany S. Sexton, Katherine Marks, Mala Samaranayake, James C. Samuelson, Heidi E. Church, Esta Tamanaha, Ivan R. Corrêa Jr., Sriharsa Pradhan, Eileen T. Dimalanta, Thomas C. Evans, Jr., Louise Williams<sup>†</sup> and Theodore B. Davis

\* These authors contributed equally to this work

† Correspondence should be addressed to [lwilliams@neb.com](mailto:lwilliams@neb.com)

### Table of Contents:

|                      |             |
|----------------------|-------------|
| Supplemental Methods | pages 2-10  |
| Supplemental Figures | pages 11-64 |
| Supplemental Tables  | pages 65-80 |

## **Supplemental Methods**

## **DNA substrates**

The following DNA was gifted or commercially sourced. NA12878 genomic DNA (Coriell Cell Repositories), unmethylated lambda DNA (Promega), *Arabidopsis thaliana* genomic DNA (Biochain), Mouse NIH/3T3 and human Jurkat DNA (NEB), XP12 phage DNA (Dr. Peter Weigele, NEB) and human adult normal lung FFPE (Biochain). Oligonucleotides for all assays were synthesized by IDT.

## **TET2 kinetic, end time point and time course reactions**

### **Preparation of genomic DNA substrate for TET2 kinetics experiments**

6 µg of genomic DNA was made up to 100 µl using 10 mM Tris, 1 mM EDTA, pH 8.0 buffer and sheared to 1500 bp using the Covaris S2 instrument. The sample was sheared using settings of 5% duty cycle, intensity 3 and 200 cycles/burst for 40 s. Sheared DNA was purified using either the Monarch PCR and DNA Cleanup kit (NEB) or QIAquick Nucleotide Removal Kit (Qiagen). The purified DNA was eluted in H<sub>2</sub>O and used in the TET2 reactions.

### **TET2 end timepoint reaction**

A master mix containing 50 mM Tris pH 8.0, 2 mM ATP, 1 mM DTT, 5 mM sodium ascorbate, 5 mM alpha-ketoglutarate (αKG), varying concentrations of TET2 and 2 ng/µl genomic DNA was prepared in a final volume of 50 µl. The reaction was initiated with the addition of 50 µM FeSO<sub>4</sub> and incubated at 37 °C for 60 min. The DNA sample was then treated with 0.8 Units of Proteinase K (NEB) for 60 min at 50 °C and subsequently purified using Oligo Clean & Concentrator kit (Zymo Research) and analyzed for oxidized 5mC modifications using liquid chromatography-mass spectrometry/mass spectrometry (LC-MS/MS) according to the procedure and instruments described previously (Tamanaha et al. 2016).

### **Activity of TET2 and T4-BGT on 5mC analyzed using mass spectrometry**

3 µg of XP12 genomic DNA was made up to 130 µl with 10 mM Tris, 1 mM EDTA, pH 8.0 buffer prior to shearing to 1500 bp using the Covaris S2 instrument set to 5% duty cycle, intensity 3 and 200 cycles/burst for 40 s. Sheared DNA was purified using SPRISelect beads (Beckman Coulter), and 1 µg used in the TET2/T4-BGT reactions. Briefly, 1 µg of genomic DNA was incubated in TET2 1X buffer (50 mM Tris pH 8.0, 2 mM ATP, 1 mM DTT, 5 mM sodium ascorbate, 5 mM αKG, 50 µM FeSO<sub>4</sub>) with 16 µg of TET2, 40 µM UDP-glu (NEB), 10 U of T4-BGT (NEB) for up to 60 min at 37 °C. 0.8 Units of Proteinase K (NEB) was added for 30 min at 37 °C, and the DNA purified using Monarch PCR and DNA Cleanup kit (NEB). The nucleotide content of the DNA was then analyzed using LC-MS/MS (Tamanaha et al. 2016).

### **APOBEC3A substrate specificity and site preference analysis**

The oligonucleotides used for the quantitative analysis of APOBEC3A site preference are shown in Supplemental Tables 1 and 2. The single stranded oligos shared a core sequence with either a single cytosine or a methylated cytosine preceded by either a thymine, uracil, guanine, adenine, or 5mC/cytosine (Supplemental Table 1). Each oligonucleotide was assayed as follows. 2 µM ssDNA oligonucleotide and 0.2 µM APOBEC3A in 1× reaction buffer (50 mM Bis-Tris, pH 6.0, 0.1% Triton X-100) were incubated at 37° C. Incubation times varied according to the oligonucleotide being assayed. For the site preference analysis, timepoints of 0, 1, 2, 4, 8 and 20 h were used. For substrate specificity assays, C and 5mC incubation times were 1, 2, 4, 8, 16, 32, 64, 128, and 256 min. For the oligonucleotides containing 5hmC, 5fC or 5caC, time points of 8, 16, 32, 64, 128, 256 min, 5 and 22 h were used. Reactions were quenched with 8 volumes of ethanol and the DNA was recovered by using the DNA Clean and Concentrator kit (Zymo Research). DNA samples were digested to nucleosides using a Nucleoside Digestion Mix (NEB). Global nucleoside content analysis was performed by LC-MS or LC-MS/MS as noted (see conditions below). For the site preference and substrate specificity assays, the

data points were best fitted by a single exponential equation to follow the disappearance of C, 5mC, 5hmC, 5fC, or 5caC nucleotides and the appearance of U or T (KaleidaGraph, Synergy Software).

### **Determining APOBEC3A activity over time**

The 2  $\mu$ M oligonucleotide substrates contained the same core sequence, but varied at one single position with either C, 5mC, 5hmC, 5gmC, 5fC or 5caC (Supplemental Table 2), were incubated with 25 nM of APOBEC3A for up to 23 h at 37 °C in 50 mM Bis-Tris pH 6.0, 0.1% Triton X-100. Samples were withdrawn at 1 h intervals and challenged by adding 2  $\mu$ M cytosine only oligonucleotide substrate (Supplemental Table 2) for 15 min at 37 °C. Deamination was terminated by sample purification using the Oligo Clean & Concentrator Kit (Zymo Research). Deamination rates of C>U and 5mC oxidation derivatives were quantified with LC-MS (Sun et al. 2021).

### **Global nucleoside analysis using LC-MS and LC-MS/MS**

LC-MS analysis was performed on an Agilent LC-MS System 1200 Series equipped with a G1315D diode array detector and a 6120 Single Quadrupole Mass Detector operating in positive (+ESI) and negative (-ESI) electrospray ionization modes. LC was carried out on a Waters Atlantis T3 column (4.6  $\times$  150 mm, 3  $\mu$ m) with a gradient mobile phase consisting of 10 mM aqueous ammonium acetate (pH 4.5) and methanol. The relative abundance of each nucleoside was determined by UV absorbance.

LC-MS/MS analysis was performed in duplicate by injecting digested DNA on an Agilent 1290 UHPLC equipped with a G4212A diode array detector and a 6490A Triple Quadrupole Mass Detector operating in the positive electrospray ionization mode (+ESI). UHPLC was carried out on a Waters XSelect HSS T3 XP column (2.1  $\times$  100 mm, 2.5  $\mu$ m) with the gradient mobile phase consisting of 10 mM aqueous ammonium formate (pH 4.4) and methanol. MS data acquisition was performed in the dynamic multiple reaction monitoring (DMRM) mode. Each nucleoside was identified in the extracted chromatogram

associated with its specific MS/MS transition: dC [M+H]<sup>+</sup> at m/z 228 →112, 5mC [M+H]<sup>+</sup> at m/z 242→126, 5hmC [M+H]<sup>+</sup> at m/z 258→142, 5fC [M+H]<sup>+</sup> at m/z 256→140 and 5caC [M+H]<sup>+</sup> at m/z 294→178. External calibration curves with known amounts of the nucleosides were used to calculate their ratios within the analyzed samples.

### **Activity of TET2, T4-BGT and APOBEC3A on NA12878 genomic DNA, analyzed using mass spectrometry**

The enzymatic activity of TET2, T4-BGT and APOBEC3A on NA12878 genomic DNA was analyzed using LC-MS. Enzymes were investigated individually or in combination as follows. For individual TET2 or T4-BGT reactions or those that combined TET2 and T4-BGT in a single reaction followed by no APOBEC3A deamination: 200 ng of NA12878 DNA was made up to 50 µl with 10 mM Tris pH 8.0. The DNA was transferred to a Covaris microTUBE (Covaris) and sheared to 300 bp using the Covaris ME220 instrument. DNA was oxidized in a 50 µl reaction volume containing 50 mM Tris pH 8.0, 1 mM DTT, 5 mM Sodium-L-Ascorbate, 20 mM αKG, 2 mM ATP, 50 mM Ammonium Iron (II) sulfate hexahydrate, 0.04 mM UDP-glu (NEB), 16 µg TET2, 10 U T4-BGT (NEB). The reaction was initiated by adding Fe (II) solution to a final reaction concentration of 40 µM, but only for the TET2 containing reactions, and then incubated for 1 h at 37 °C. 0.8 U of Proteinase K (NEB) was then added and incubated for 30 min at 37 °C. The DNA was purified using 90 µl of resuspended NEBNext Sample Purification Beads according to the manufacturer's instructions and eluted in 18 µl water. 17 µl was transferred to a new tube then prepped for nucleoside digestion. DNA samples were digested to nucleosides using a Nucleoside Digestion Mix (NEB). Global nucleoside content analysis was performed by LC-MS. Reactions that used APOBEC3A either individually or after TET2 and T4-BGT treatment were set up as follows. If there was no upstream TET2 or T4-BGT reactions, 200 ng of NA12878 DNA was made up to 50 µl with 10 mM Tris pH 8.0. The DNA was transferred to a Covaris microTUBE (Covaris) and sheared to 300 bp using the Covaris ME220 instrument. The DNA was purified using 90 µl of resuspended NEBNext Sample

Purification Beads according to the manufacturer's instructions and eluted in 16  $\mu$ l water. For individual APOBEC3A reactions as well as those that has upstream TET2 and T4-BGT treatments, 4  $\mu$ l of formamide (Sigma-Aldrich) was added and the reactions were incubated at 85  $^{\circ}$ C for 10 min. The DNA was then deaminated in 50 mM Bis-Tris pH 6.0, 0.1% Triton X-100, 20  $\mu$ g BSA (NEB) using 0.2  $\mu$ g of APOBEC3A (NEB). The reaction was incubated at 37  $^{\circ}$ C for 3 h and the DNA was purified using 100  $\mu$ l of resuspended NEBNext Sample Purification Beads according to the manufacturer's protocol. The sample was eluted in 18  $\mu$ l water and 17  $\mu$ l was transferred to a new tube then prepped for nucleoside digestion. DNA samples were digested to nucleosides using a Nucleoside Digestion Mix (NEB). Global nucleoside content analysis was performed by LC-MS. DNA for unconverted control reactions were set up as follows. 200 ng of NA12878 DNA was made up to 50  $\mu$ l with 10 mM Tris pH 8.0. The DNA was transferred to a Covaris microTUBE (Covaris) and sheared to 300 bp using the Covaris ME220 instrument. The DNA was purified using 90  $\mu$ l of resuspended NEBNext Sample Purification Beads according to the manufacturer's instructions and eluted in 18  $\mu$ l water and 17  $\mu$ l was transferred to a new tube then prepped for nucleoside digestion. DNA samples were digested to nucleosides using a Nucleoside Digestion Mix (NEB). Global nucleoside content analysis was performed by LC-MS.

### **PCR of long amplicons**

Sodium bisulfite conversion: 200 ng of NA12878 DNA was converted using the EZ DNA Methylation-Gold Kit (Zymo Research) according to the manufacturer's instructions. Enzymatic 5mC/5hmC

Conversion: 200 ng of NA12878 DNA was incubated with 16  $\mu$ g of TET2 enzyme and 10 U of T4-BGT (NEB) in 40  $\mu$ M UDP-glu, 50 mM Tris pH 8.0, 2 mM ATP, 1 mM DTT, 5 mM sodium ascorbate, 5 mM  $\alpha$ KG and 50  $\mu$ M Fe(II) for 30 min at 37  $^{\circ}$ C, in a final volume of 50  $\mu$ l. Then, 0.8 U of Proteinase K (NEB) was added and incubated for 30 min at 37  $^{\circ}$ C. DNA was purified using a Genomic DNA Clean & Concentrator (Zymo Research). The DNA was then denatured by adding formamide to 20% (v/v) at and incubating for

10 min at 90 °C. DNA was deaminated using 0.26 µg of APOBEC3A in a 100 µl reaction volume for 3 h. 3 µl from 100 µl of enzymatically converted and 1 µl from 15 µl of bisulfite-converted DNA were PCR amplified with Q5U polymerase (NEB) and primers (Supplemental Table 4) using the following cycling conditions: 98 °C for 30 s, then 35 cycles of 98 °C for 10 s, 63 °C for 20 s, and 68 °C for 2 min. The resulting PCR products were 543, 1181, 1750, 2207 and 2945 bp. PCR amplicons were visualized on a 2% agarose gel run in 1× TBE buffer and stained with ethidium bromide.

### **Generation and analysis of XP12 data**

EM-seq libraries were made using 50 ng NA12878 spiked with 1 ng unmethylated lambda (Promega), 1 ng XP12 and 0.05 ng CpG methylated pUC19 as described for the 10 ng - 200 ng EM-seq protocol described in the Methods section. Illumina data was analyzed as follows. The XP12 genome was divided into strand-specific 50 bp windows at 25 bp step. For each window, the number of cytosines and the average 5mC quantification by EM-seq were calculated. The EM-seq methylation quantification was plotted (Y-axis) against the cytosine density (X axis, which is also the methylation density since all the cytosines are methylated in XP12) of the XP12 genome using a boxplot in R.

### **Illumina data analysis**

Illumina data were used to determine unique features assembled from the Eukaryotic Promoter Database (promoters), UCSC's Table Browser (CpG Islands), Dfam (repetitive elements) (Hubley et al. 2016), and NCBI's RefSeq annotation (remainder). Coverage of these features was assessed using featureCounts. Coverage of Transcription start sites (GENCODE v29 (Frankish et al. 2019)) was calculated using deepTools (Ramirez et al. 2016) after combining both technical replicates and sampling 1.3B reads for each input amount and conversion method.

bigWig coverage tabulation:



```
find . -name '*combined_reps.bam' | parallel bamCoverage -b {} -o {._}_3840_mq30.bw \  
  --samFlagExclude 3840 --minMappingQuality 30
```

Coverage matrix construction:

```
computeMatrix reference-point -S *.bw -R gencode.v29.basic.annotation.gtf \  
  -a 2000 -b 2000 -o 2kb_start_codon.matrix --referencePoint TSS -p max/2
```

Heatmap plotting:

```
plotHeatmap -m 2kb_start_codon.matrix --boxAroundHeatmaps no \  
  --colorList azure,lightblue,cornflowerblue,royalblue,blue,mediumblue,darkblue,navy,midnightblue \  
  --missingDataColor white --yMax 65 --yMin 0 --colorNumber 80 \  
  --samplesLabel "10 ng EM-seq" "10 ng WGBS" "50 ng EM-seq" "50 ng WGBS" "200 ng EM-seq" "200 ng WGBS" \  
  -o gencode.v29.basic.annotation_tss_cov_blue.pdf
```

We used a binning approach to calculate the fraction of sites covered and methylation status of sites with at least 8× coverage. Windows of +/- 2 kb around each transcription start site (TSS) were divided into 10 bp bins. We calculated the percent of bins containing at least one CpG with at least 8× coverage in comparison to all bins with at least 8× coverage. For methylation, we calculated the average methylation of CpGs with at least 8× coverage in each 10 bp bin. We assessed the number of “usable reads” using “SAMtools view -F 0xF00 -q 10 -c  $\{bam\}$ ” A nextflow (Tommaso et al. 2017) workflow containing the analysis detail is available in the at <https://github.com/nebiolabs/EM-seq/>

Due to excess control concentration in the low-input experiment, downsampling was performed to produce equivalent numbers of human reads and replicates were assessed independently before combination for final methylation assessment. Summary fractions are expressed as fractions of human reads (instead of total reads). Otherwise, software methods remained the same as for the standard protocol libraries. Software versions: MethylDackel 0.3.0, bwameth=0.2.0, bwa=0.7.17, bwakit=0.7.15, samblaster=0.1.24, sambamba=0.6.6, picard=2.18.14.

## References

- Frankish A, Diekhans M, Ferreira AM, Johnson R, Jungreis I, Loveland J, Mudge JM, Sisu C, Wright J, Armstrong J et al. 2019. GENCODE reference annotation for the human and mouse genomes. *Nucleic Acids Res* **47**: D766-D773.
- Hubley R, Finn RD, Clements J, Eddy SR, Jones TA, Bao W, Smit AF, Wheeler TJ. 2016. The Dfam database of repetitive DNA families. *Nucleic Acids Res* **44**: D81-89.
- Ramirez F, Ryan DP, Gruning B, Bhardwaj V, Kilpert F, Richter AS, Heyne S, Dundar F, Manke T. 2016. deepTools2: a next generation web server for deep-sequencing data analysis. *Nucleic Acids Res* **44**: W160-165 doi:10.1093/nar/gkw257.
- Sun Z, Vaisvila R, Hussong LM, Yan B, Baum C, Saleh L, Samaranyake M, Guan S, Dai N, Correa IR, Jr. et al. 2021. Nondestructive enzymatic deamination enables single-molecule long-read amplicon sequencing for the determination of 5-methylcytosine and 5-hydroxymethylcytosine at single-base resolution. *Genome Res* doi:10.1101/gr.265306.120.
- Tamanaha E, Guan S, Marks K, Saleh L. 2016. Distributive Processing by the Iron(II)/alpha-Ketoglutarate-Dependent Catalytic Domains of the TET Enzymes Is Consistent with Epigenetic Roles for Oxidized 5-Methylcytosine Bases. *J Am Chem Soc* **138**: 9345-9348.
- Tommaso PD, Chatzou M, Floden EW, Barja PP, Palumbo E, Notredame C. 2017. Nextflow enables reproducible computational workflows. *Nat Biotechnol* **35**: 316-319.

## **Supplemental Figures**

Supplemental Figure 1

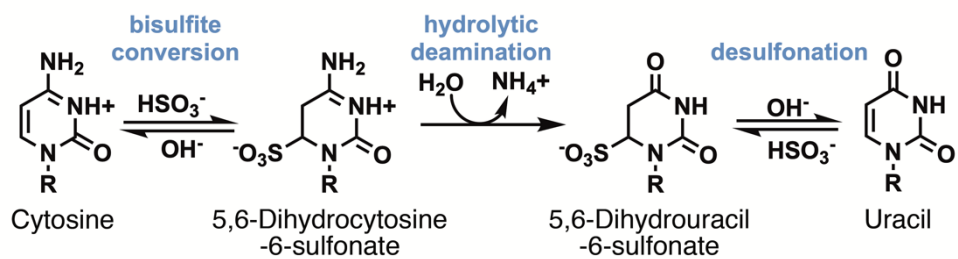

### Chemistry of sodium bisulfite conversion

Three chemical steps are needed to deaminate cytosine to uracil. Bisulfite conversion forms the intermediate 5,6-Dihydrocytosine-6-sulfonate which can then undergo hydrolytic deamination to form 5,6-Dihydrouracil-6-sulfonate. Desulfonation during the final step of conversion results in the formation of uracil.

Supplemental Figure 2

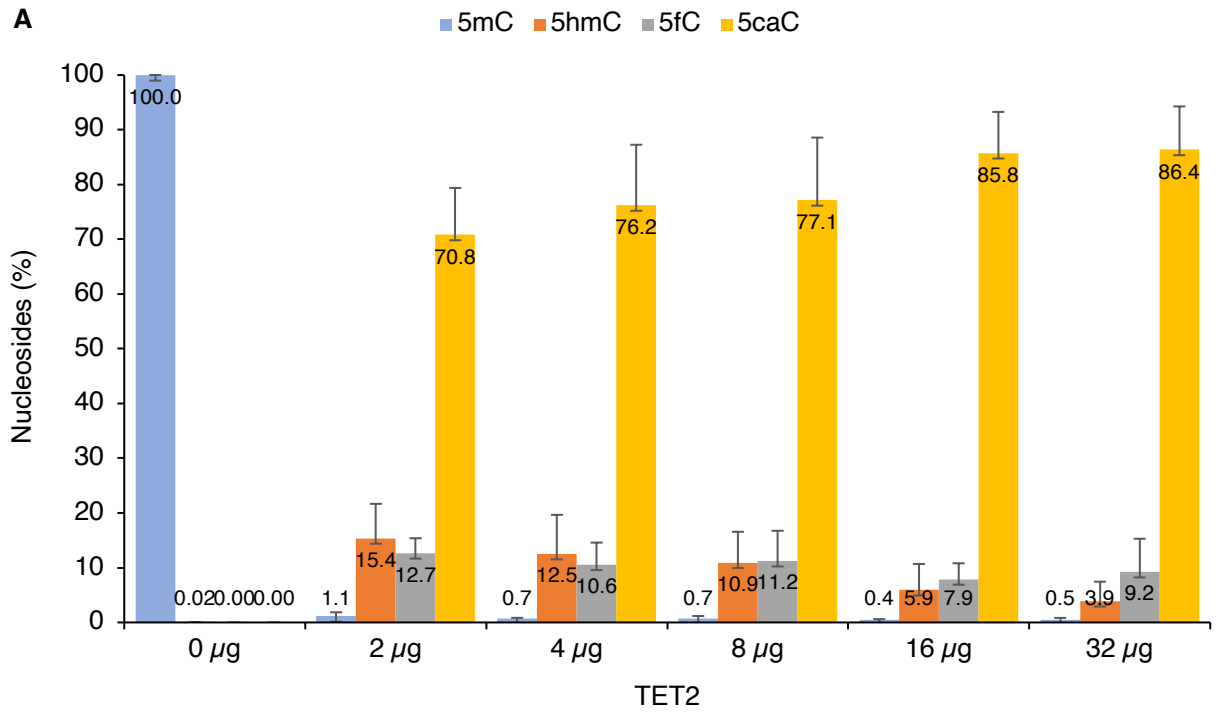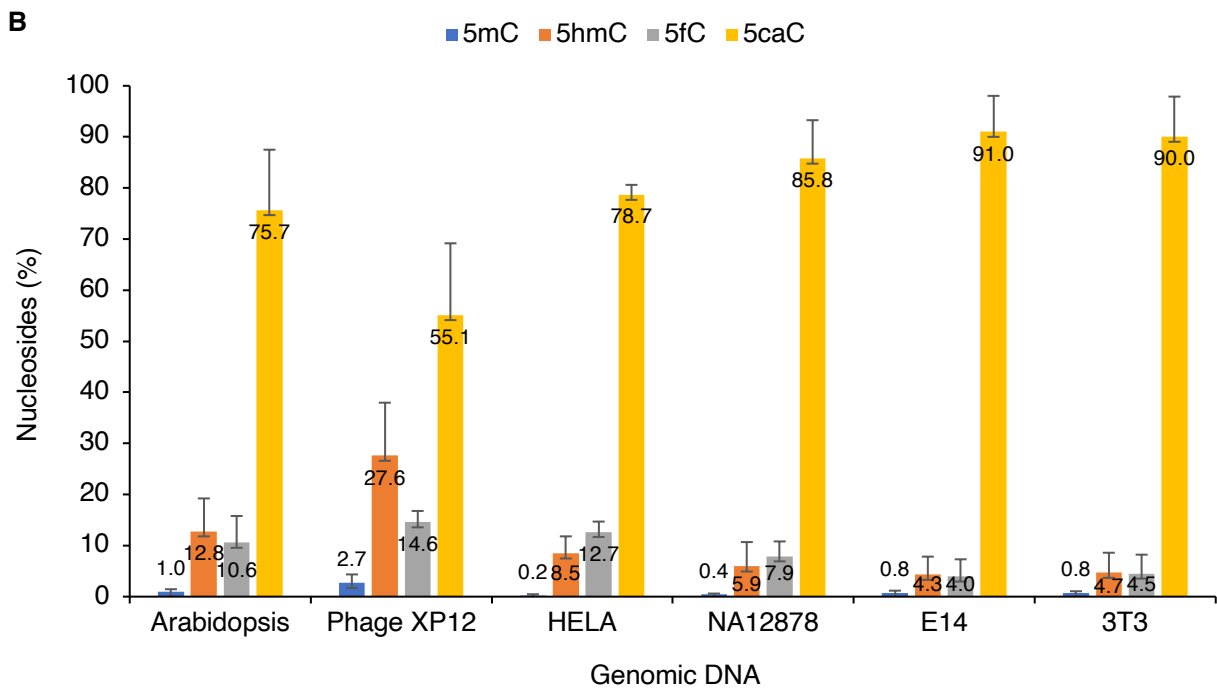

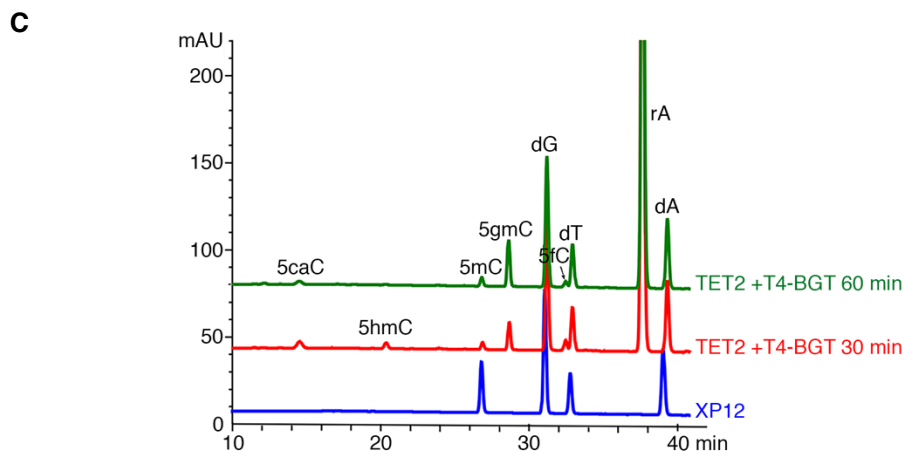

### Mass spectrometry analysis of the activity of TET2 and T4-BGT on 5mC and 5hmC

(A) Titration of TET2 (0 – 32  $\mu\text{g}$ ) with NA12878 genomic DNA shows that for all TET2 concentrations,  $\geq 99\%$  of 5mC (blue) are oxidized to 5hmC (orange), 5fC (gray), and 5caC (yellow) with 5caC constituting approximately 70-85% of total oxidized product. (B) TET2 activity on different genomic DNAs.  $\geq 99\%$  of 5mC is converted to its oxidized forms for all genomic DNAs in the presence of 16  $\mu\text{g}$  TET2 except for Phage XP12 where 5mC conversion was  $>95\%$ . All reactions were performed with 200 ng genomic DNA in a total volume of 50  $\mu\text{l}$  at 37  $^{\circ}\text{C}$  for 60 min. LCMS data used to generate (A) and (B) are in Supplemental File 1. (C) LC-MS spectra showing the activity of TET2 and T4-BGT on XP12 genomic DNA. rA is adenosine and is derived from the ATP added to the TET2 reaction. The blue trace shows the starting XP12 genomic DNA substrate. The red and green traces show the formation of four products, 5hmC, 5fC, 5caC, and 5gmC, by TET2 and T4-BGT at 30 and 60 min, respectively.

Supplemental Figure 3

A

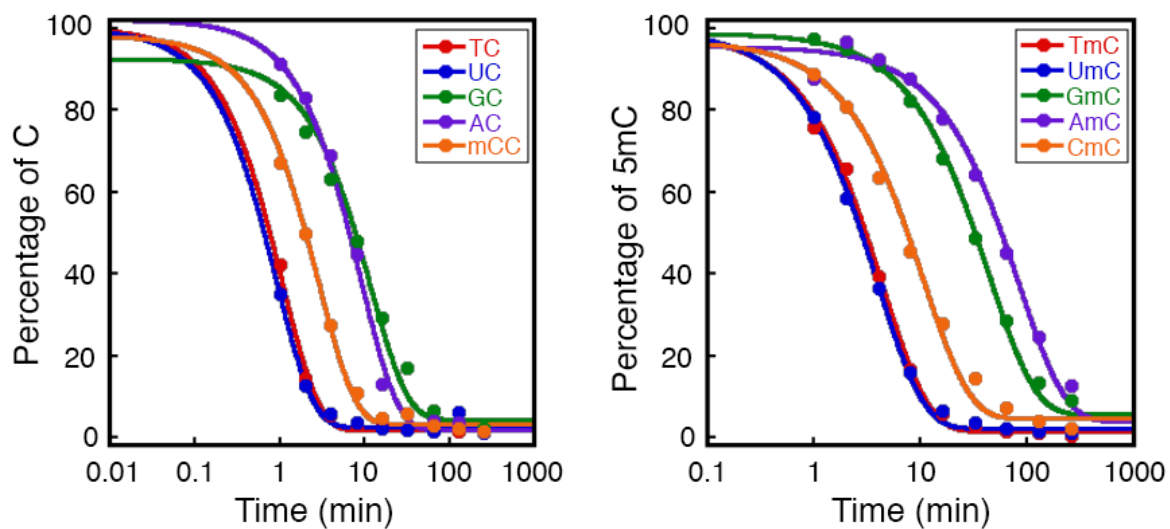

B

| Substrate | $k_{obs}$ ( $\text{min}^{-1}$ ) | Substrate | $k_{obs}$ ( $\text{min}^{-1}$ ) |
|-----------|---------------------------------|-----------|---------------------------------|
| UC        | 1.1                             | UmC       | 0.26                            |
| TC        | 0.94                            | TmC       | 0.23                            |
| mCC       | 0.35                            | CmC       | 0.095                           |
| AC        | 0.11                            | GmC       | 0.023                           |
| GC        | 0.085                           | AmC       | 0.012                           |

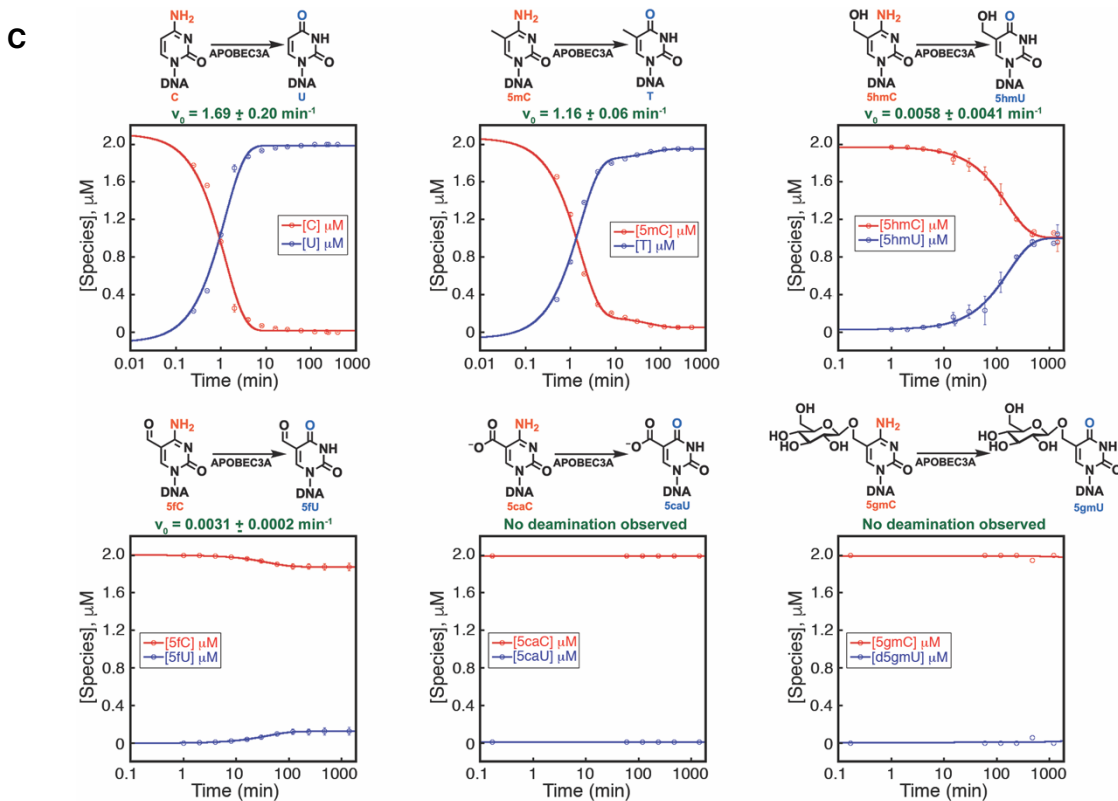

### APOBEC3A substrate specificity

(A) Time course reactions with 0.2  $\mu\text{M}$  APOBEC3A and 2  $\mu\text{M}$  single-stranded oligonucleotide substrate containing either a cytosine or 5mC preceded by different bases as specified in the legend. Global nucleoside content analysis was performed by LC-MS. Oligonucleotide sequences are in Supplemental Table 1. (B) Observed rate constants ( $k_{\text{obs}}$ ) for C and 5mC disappearance extracted from single exponential fits (solid traces) to the experimental data (closed circles). (C) Time course reactions of 0.2  $\mu\text{M}$  APOBEC3A and 2  $\mu\text{M}$  single-stranded oligonucleotides containing either cytosine, 5mC, 5hmC, 5gmC, 5fC, 5caC (Supplemental Table 2). Synthesis of 5gmC is described in Supplemental Figure 4.  $k_{\text{obs}}$  and initial rate values for the disappearance of the various C forms are extracted from single exponential fits (solid traces) to the experimental data (open circles). LC-MS was used to determine the amounts of substrate and products within each reaction and the data points underwent best fit analysis using KaleidaGraph (Synergy Software). The LCMS data used to generate (A) and (C) are in Supplemental File 1.



**Supplemental Figure 4**

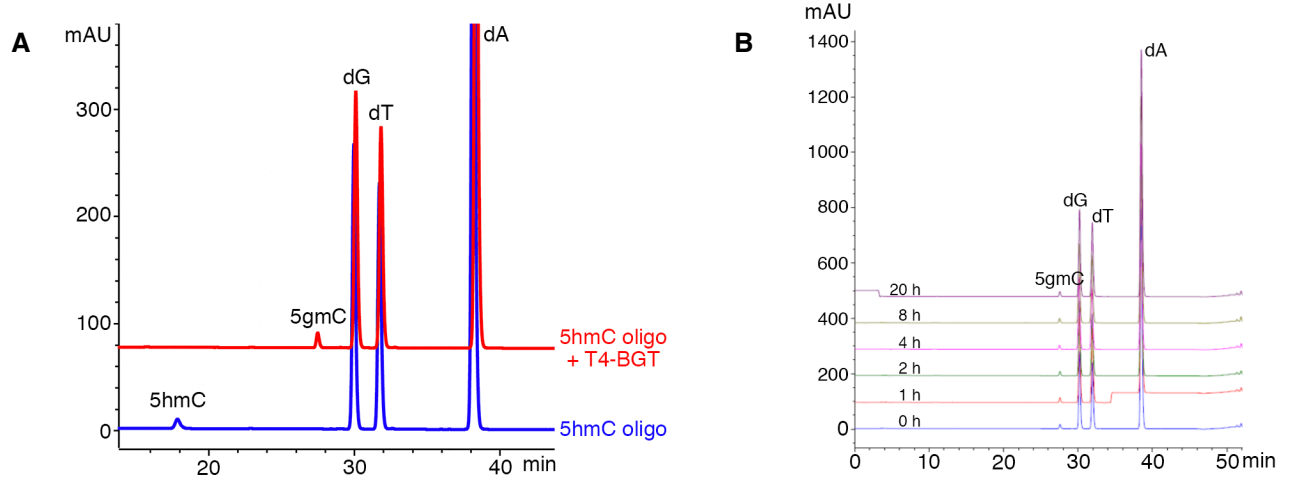

**C**

| APOBEC3A incubation time (h) | 5gmC  | G     | T     | A     |
|------------------------------|-------|-------|-------|-------|
| 0                            | 0.036 | 0.397 | 0.507 | 1.000 |
| 1                            | 0.036 | 0.399 | 0.510 | 1.000 |
| 2                            | 0.036 | 0.398 | 0.509 | 1.000 |
| 4                            | 0.036 | 0.397 | 0.508 | 1.000 |
| 8                            | 0.035 | 0.397 | 0.507 | 1.000 |
| 20                           | 0.036 | 0.398 | 0.509 | 1.000 |

**Generation of 5-( $\beta$ -glucosyloxymethyl)cytosine single stranded DNA substrate**

(A) An oligonucleotide with an internal 5-hydroxymethylcytosine (ATAAGAATAGAATGAAT/i5HydMe-dC/GTGAAATGAATATGAAATGAATAGTA) was incubated with T4-BGT and the formation of 5gmC demonstrated. (B, C) Time course showing APOBEC3A activity on the glucosylated oligonucleotide. APOBEC3A does not deaminate 5gmC. The extinction coefficient constant for 5gmC is not available, therefore the extinction coefficient for C was used instead. This oligonucleotide was used in Supplemental Figure 3C.

## Supplemental Figure 5

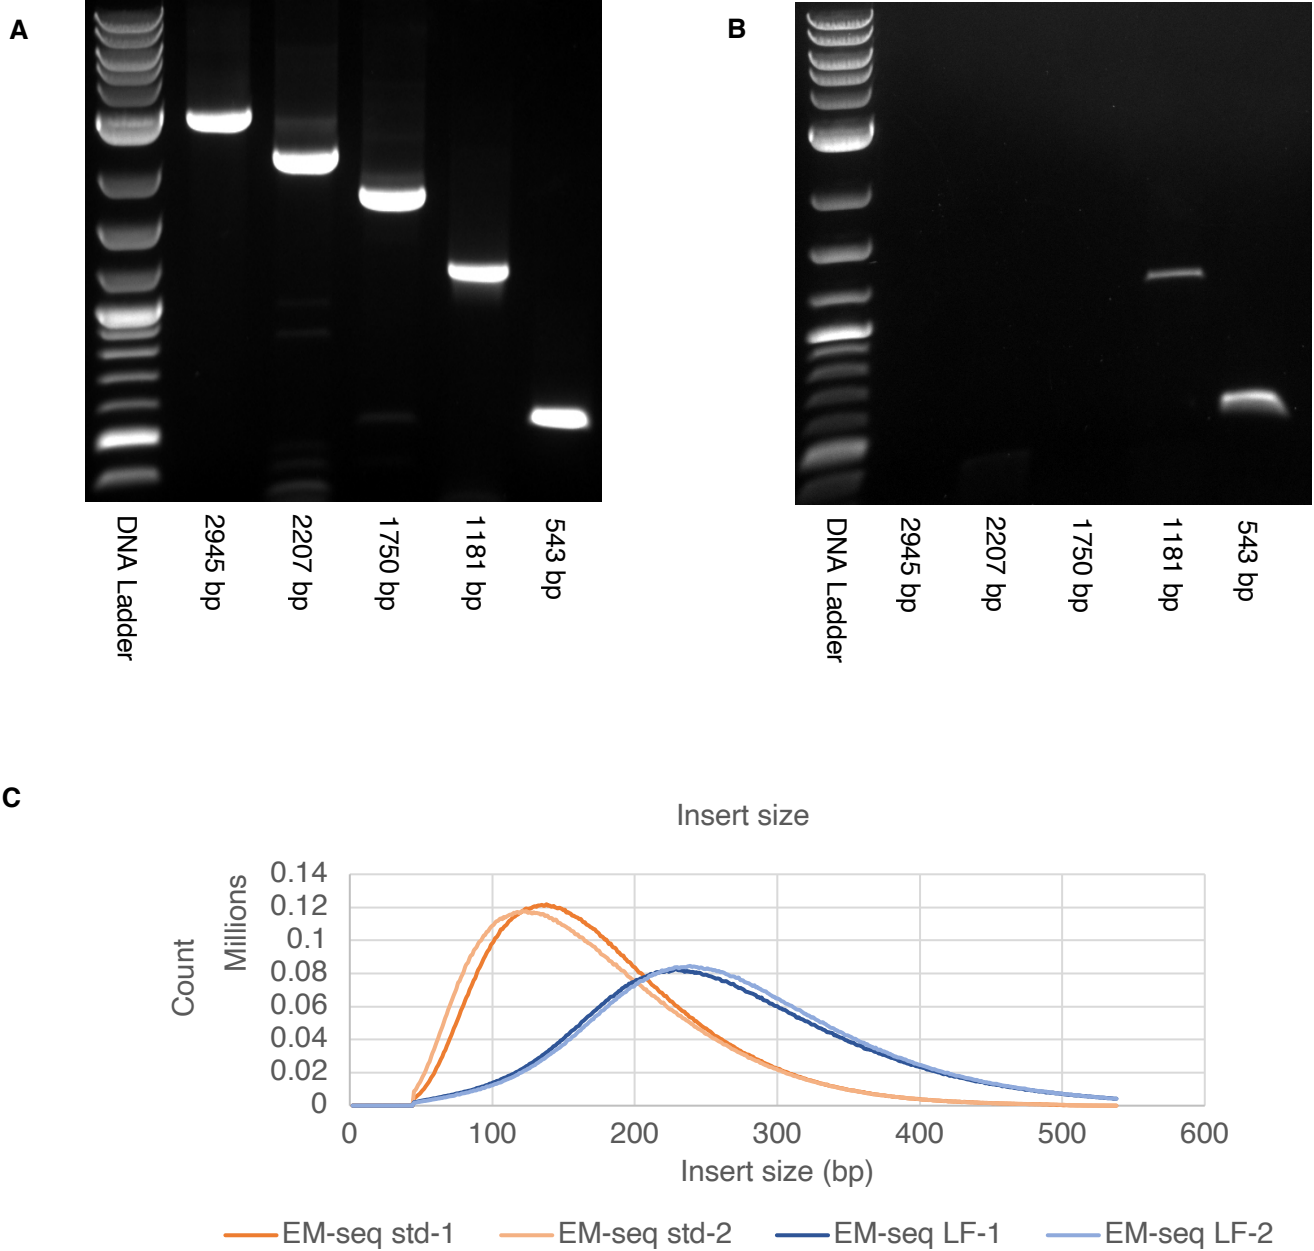

### DNA integrity assessment

(A) and (B) NA12878 DNA was sheared to 5 kb prior to enzymatic conversion or bisulfite conversion. End-point PCR was performed using five amplicons ranging in size from 543 bp to 2945 bp. The PCR primers used are shown in Supplemental Table 4. The PCR products were separated using agarose gel

electrophoresis and their images are shown in (A) TET2/T4-BGT followed by APOBEC3A treated samples and (B) bisulfite treated DNA. The left lane represents 1 kb Plus DNA Ladder (NEB). (C) Larger insert Illumina libraries were generated by increasing the shearing size of the DNA to 1 kb and altering the bead clean up after PCR. The larger fragment (LF) libraries have larger inserts than the standard (std) sized EM-seq library inserts. These data indicate that DNA integrity is maintained in the enzymatically treated DNA.

Supplemental Figure 6

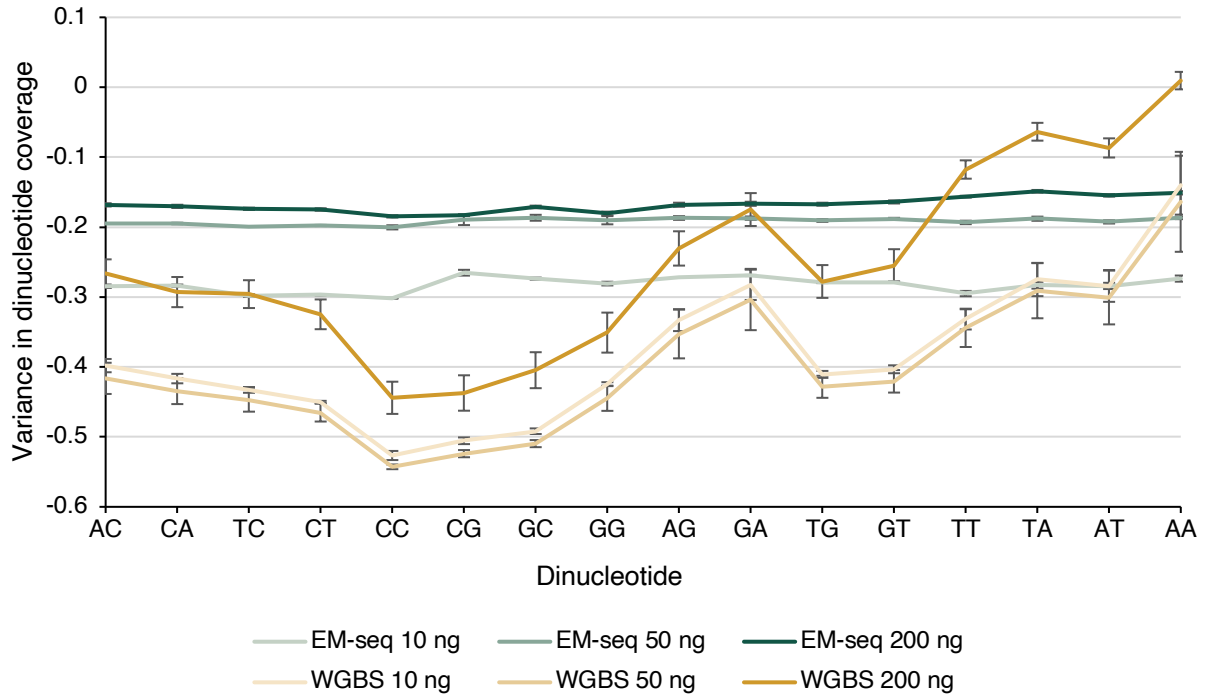

**Nucleotide analysis of EM-seq and bisulfite libraries.**

EM-seq and WGBS libraries were made using 10 ng, 50 ng and 200 ng of NA12878 DNA. Dinucleotide distribution for the data was normalized to coverage observed in an unconverted Ultra II DNA library using the same input DNA as the EM-seq and WGBS libraries. The even distribution of dinucleotides found in EM-seq libraries provides evidence for reduced bias compared to WGBS.

Supplemental Figure 7

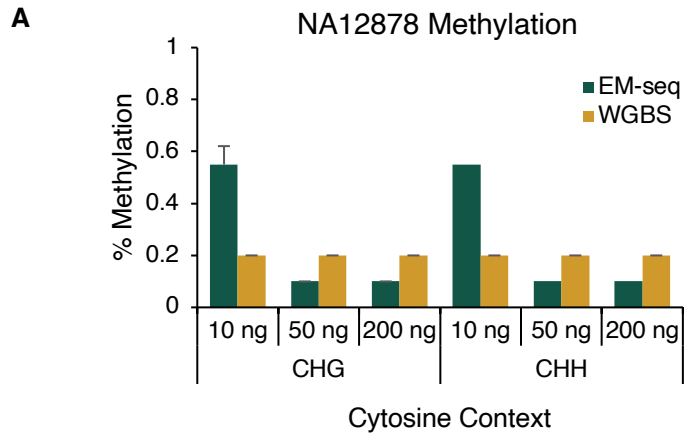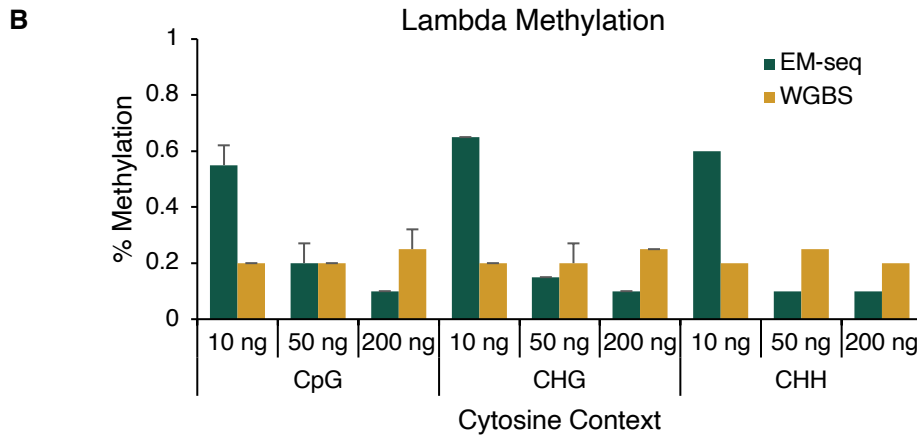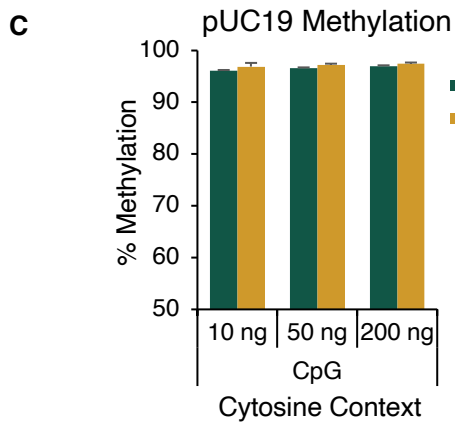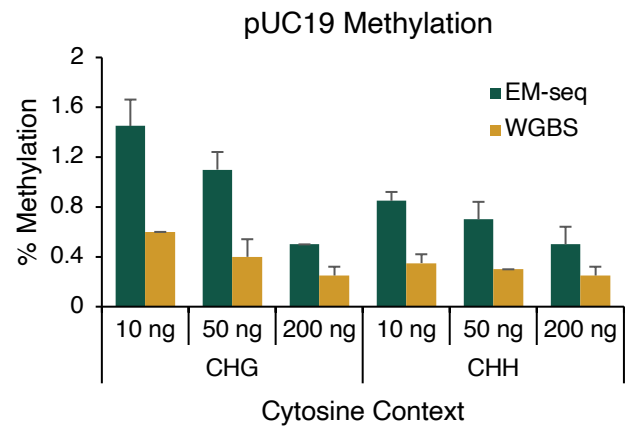

### **Cytosine methylation in the EM-seq and bisulfite NA12878 library internal controls**

(A) Cytosine methylation of NA12878 DNA in the CHG and CHH contexts. (B) Methylation of cytosines in the unmethylated lambda controls. EM-seq and WGBS have <1% methylation in CpG, CHG and CHH contexts. (C) Methylation of cytosines in the CpG methylated pUC19 control. EM-seq and WGBS libraries have approximately 97% methylation in the CpG context and around 1% in the CHG and CHH contexts.

Supplemental Figure 8

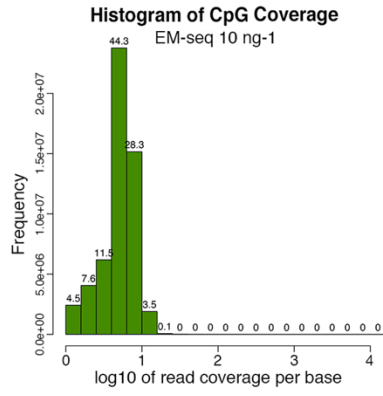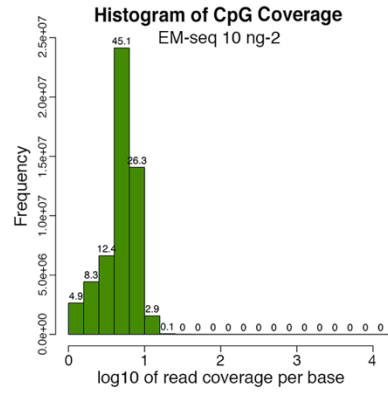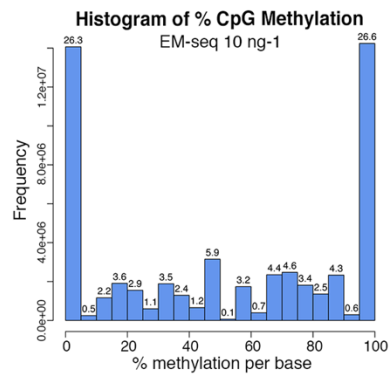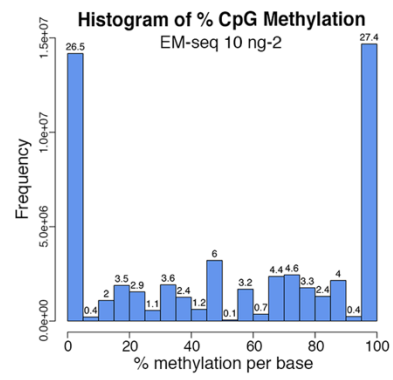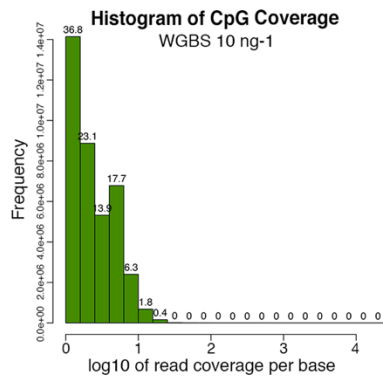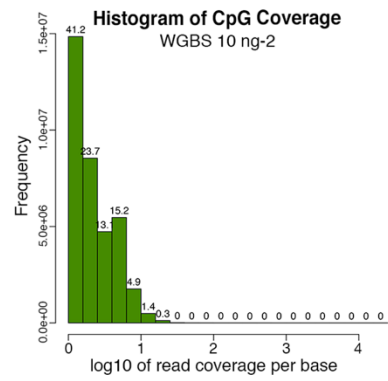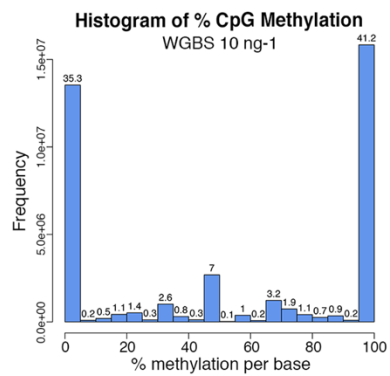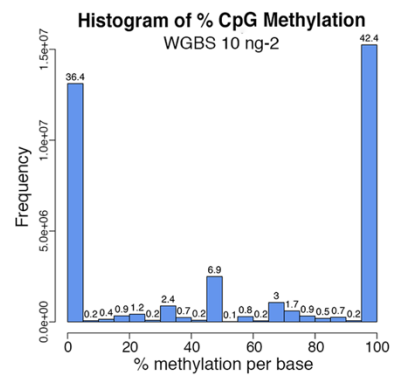

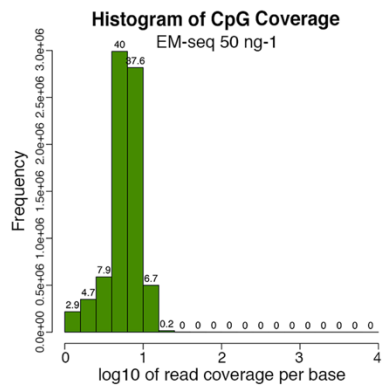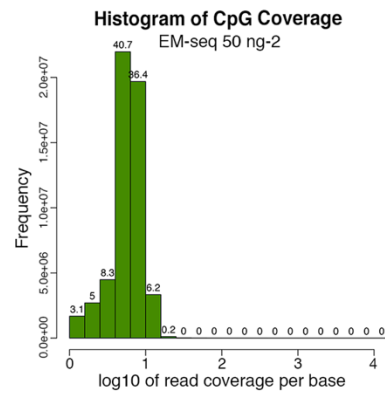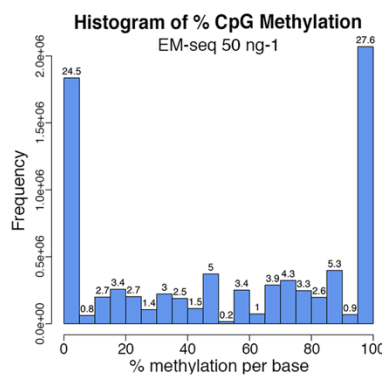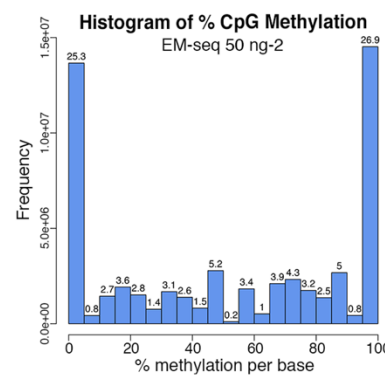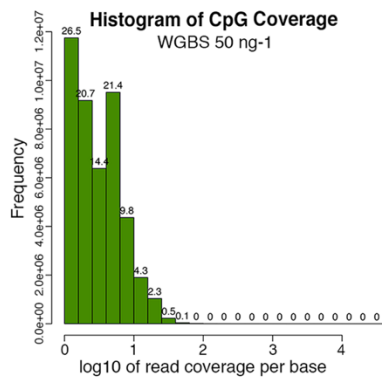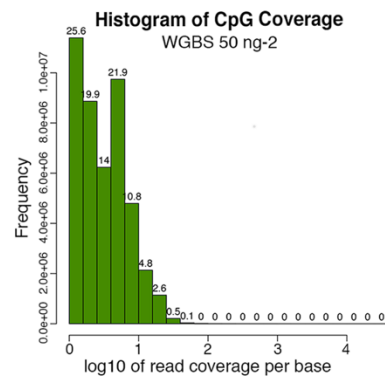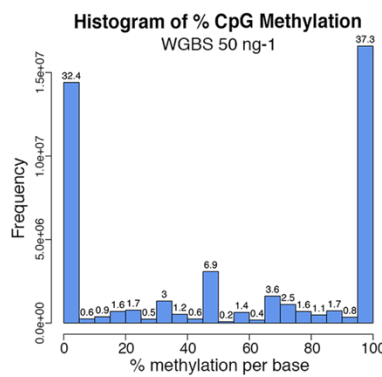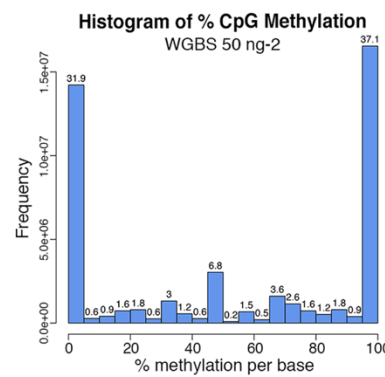



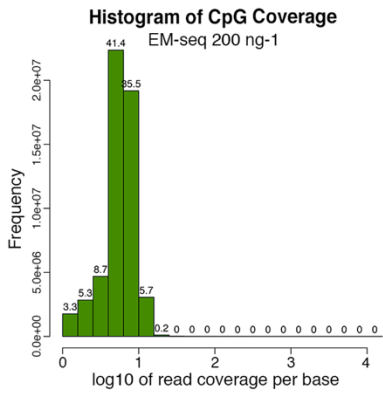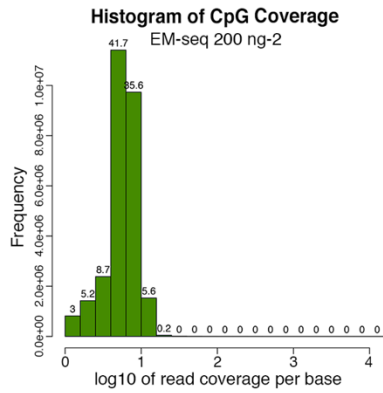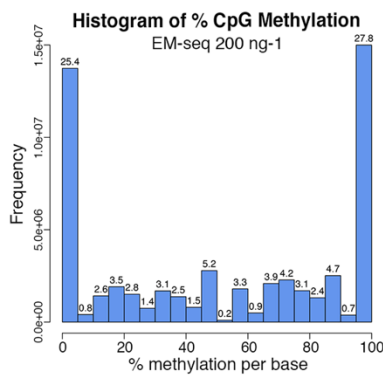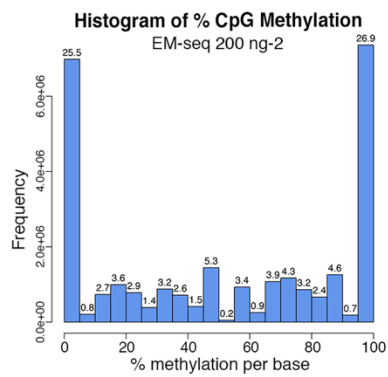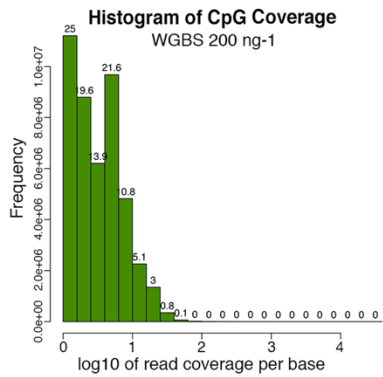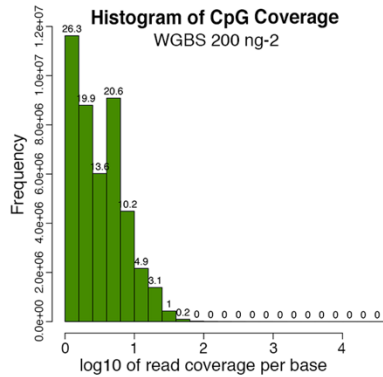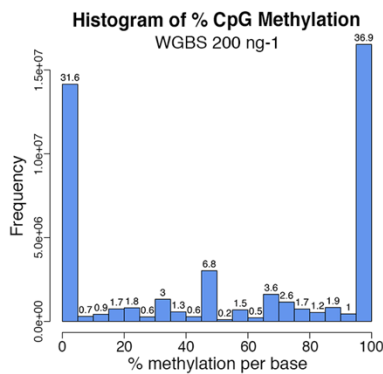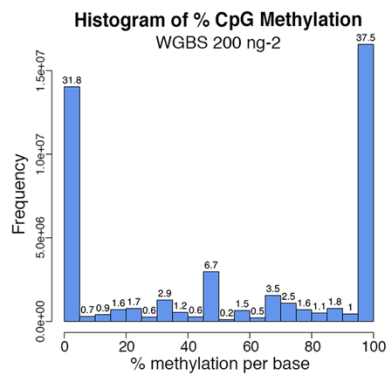

### **CpG coverage and methylation per base**

MethyKit was used to generate CpG coverage and percent methylation per base plots for data from EM-seq and bisulfite libraries made using 10, 50 and 200 ng NA12878 DNA.

**Supplemental Figure 9**

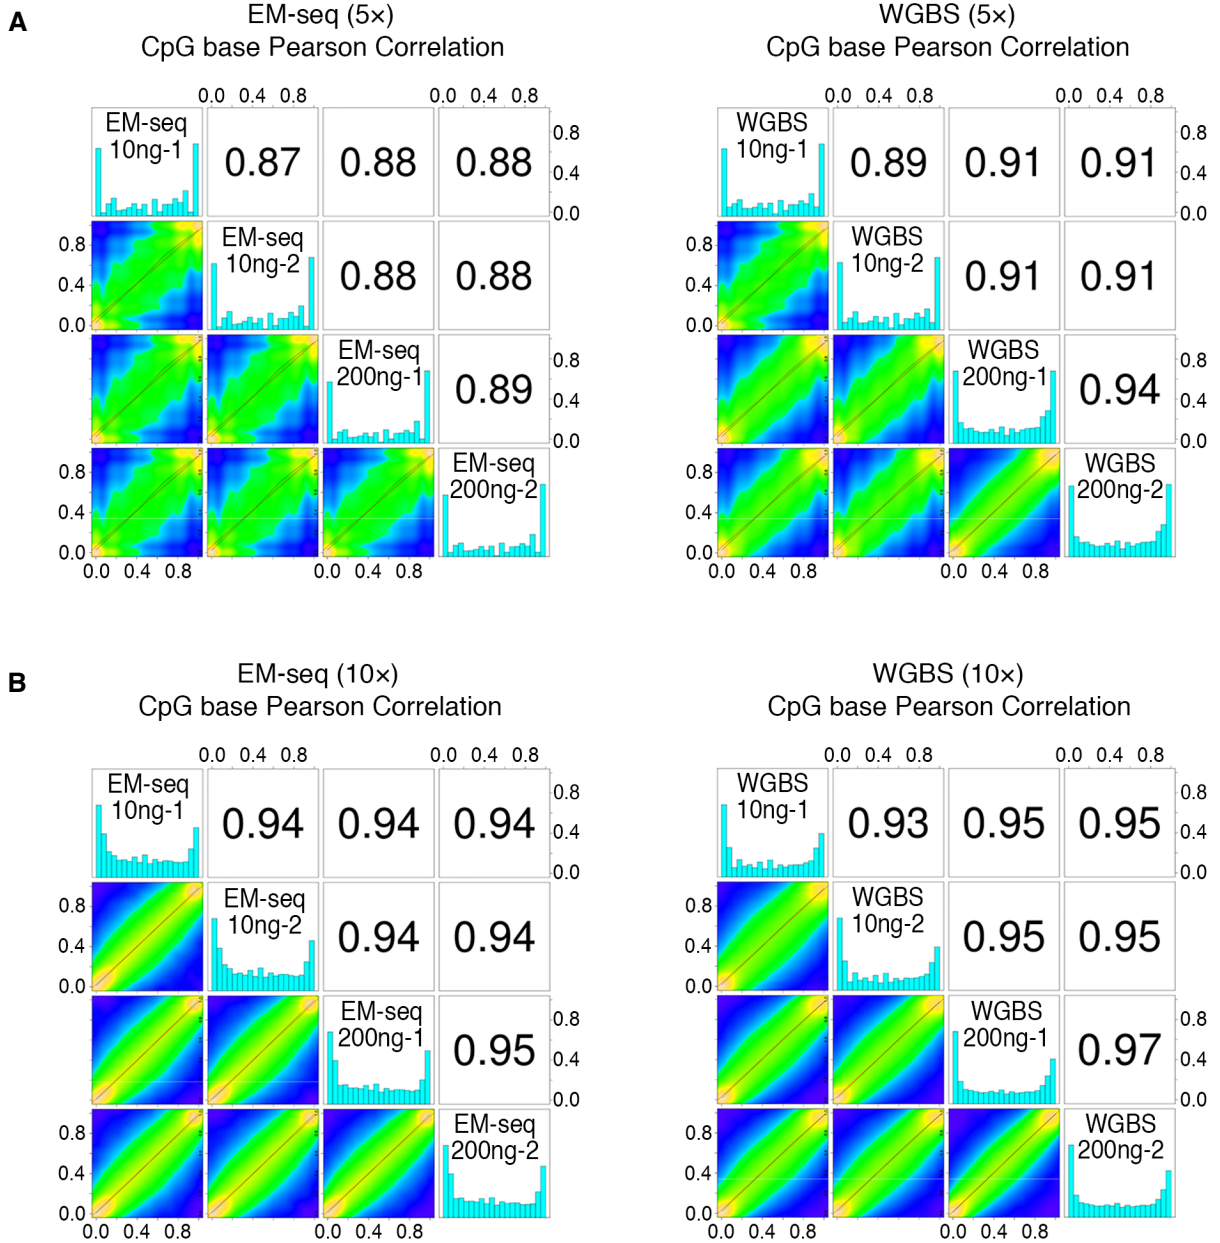

**C**

| Correlation Coverage | EM-seq: CpGs used for correlation | WGBS: CpGs used for correlation |
|----------------------|-----------------------------------|---------------------------------|
| 1×                   | 53,458,888                        | 25,958,126                      |
| 5×                   | 14,878,258                        | 3,578,394                       |
| 10×                  | 179,991                           | 615,413                         |

**D****CpG base Pearson Correlation**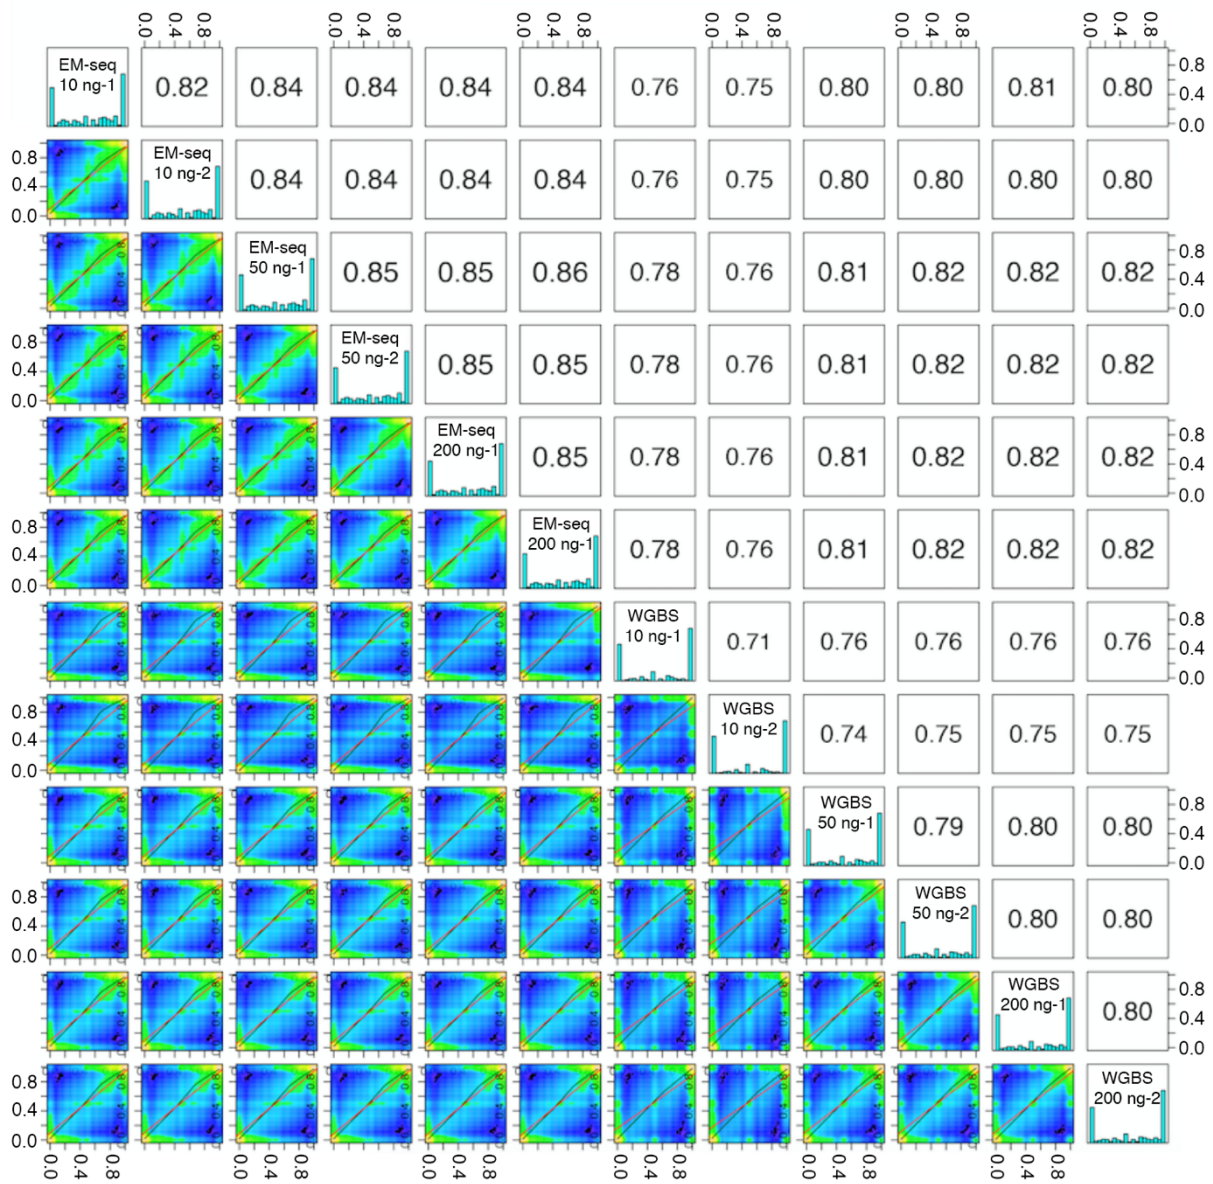**Correlations between EM-seq and bisulfite libraries**

(A, B) MethylKit was used to plot correlations of data from 10 ng and 200 ng NA12878 EM-seq and bisulfite libraries at coverage depths of 5× (A) or 10× (B). (C) Different coverage thresholds result in the identification of differential numbers of CpGs between EM-seq and WGBS libraries. (D) Correlations were plotted using methylKit for 10 ng, 50 ng and 200 ng NA12878 EM-seq libraries and bisulfite

libraries at 1× minimum coverage (21 million CpGs common to all libraries). Correlations are highest for EM-seq libraries regardless of input. WGBS library correlations are lower with 10 ng inputs driving the lowest correlations and limiting the number of CpGs common to all libraries.

## Supplemental Figure 10

Enhanced coverage for CpGs around Transcription Start Sites (TSS) in EM-seq Libraries

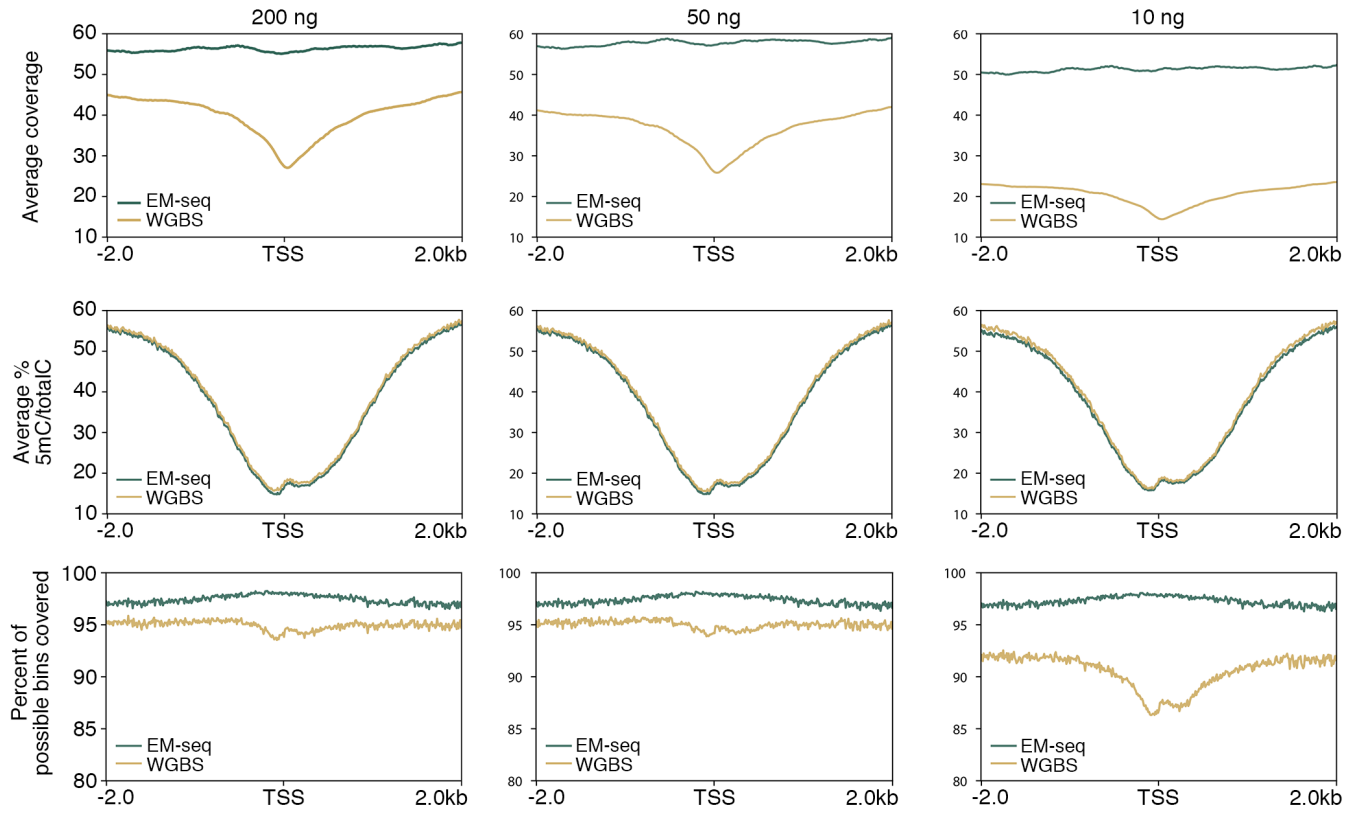

### CpG coverage and methylation at the transcription start site

CpG coverage and methylation for EM-seq and WGBS libraries across TSS. This data had no coverage filtering before analysis.

Supplemental Figure 11

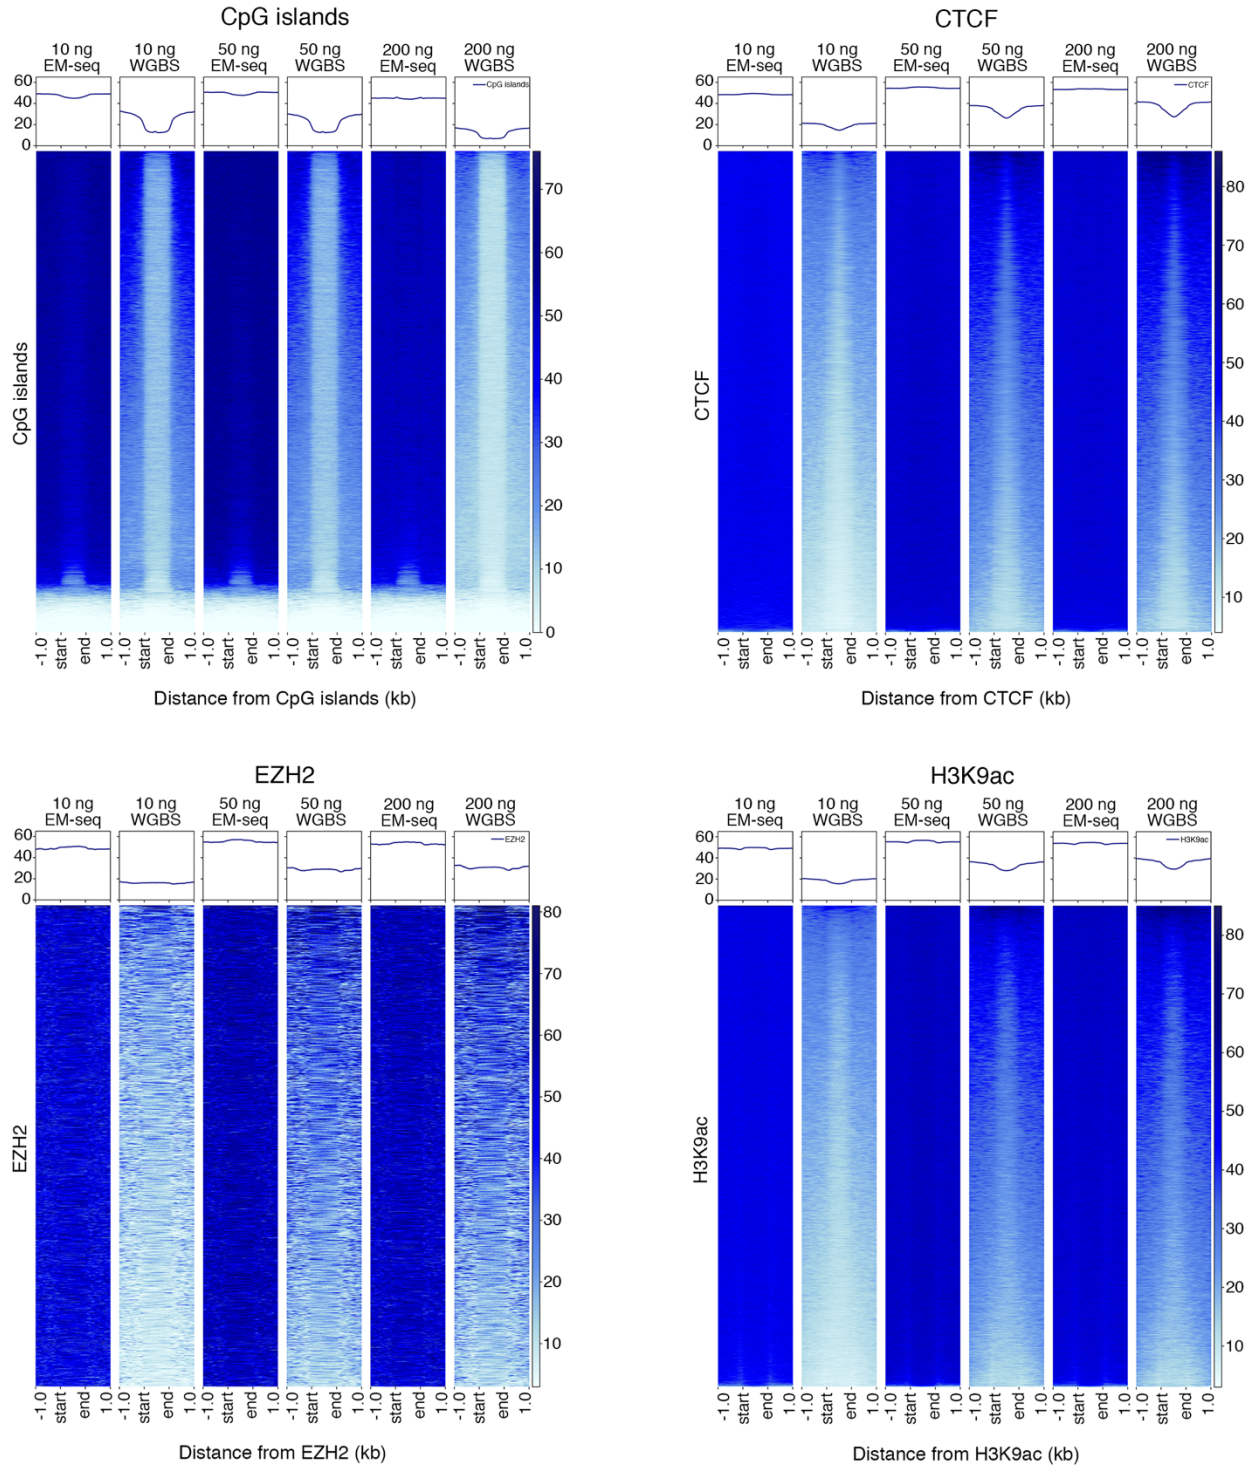

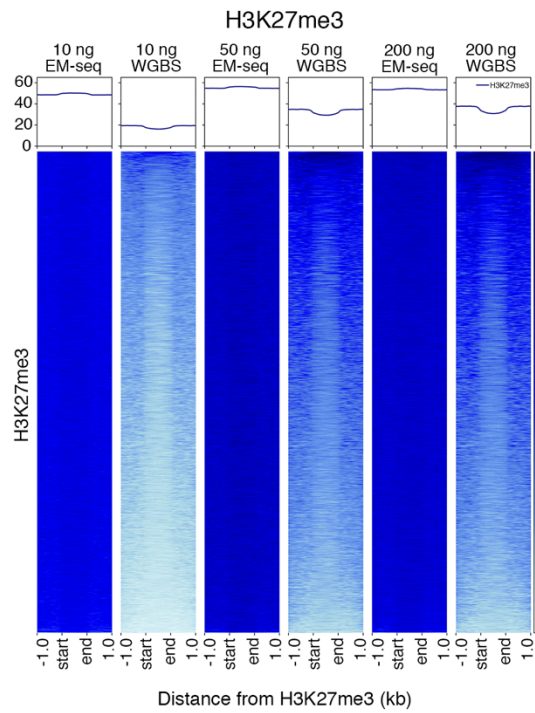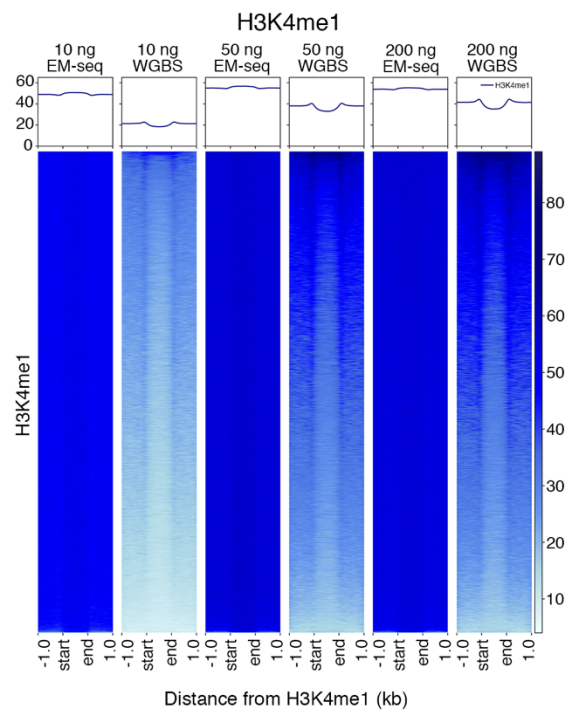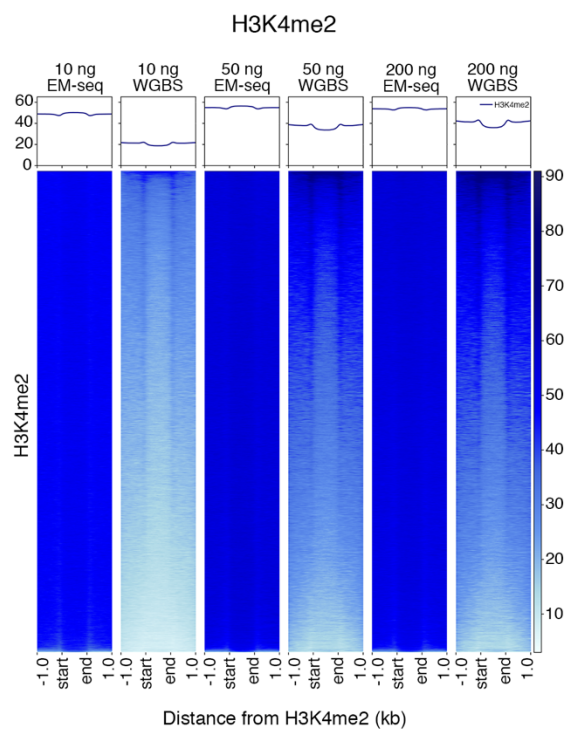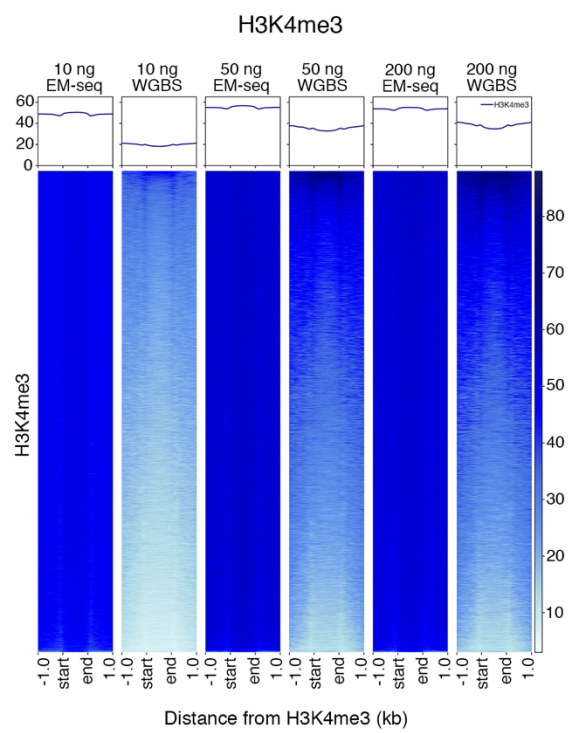



### **Even coverage of CpGs found in diverse genomic features using EM-seq**

Heat maps (made using deepTools, gencode) representing CpG coverage across a range of genomic features including CTCF and EZH2 binding sites, CpG islands as well as H3K4me1, H3K4me2, H3K4me3, H3K27me3 and H3K9ac binding sites. Coverage plot include +/- 1 kb either side of the start and end of each feature.

## Supplemental Figure 12

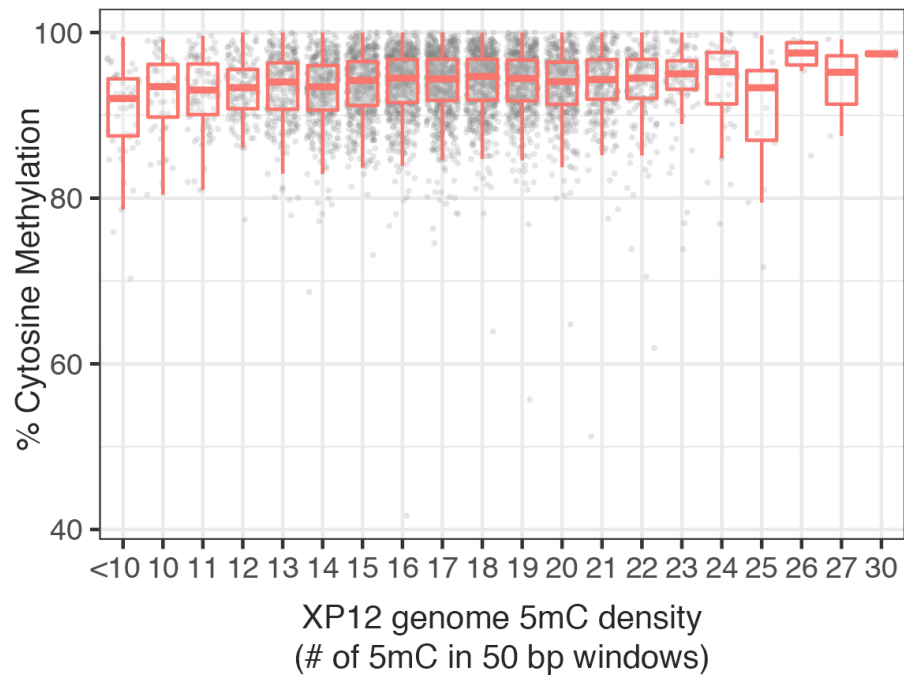

### Methylation of cytosine in XP12

An EM-seq library was made using XP12 genomic DNA. The XP12 genome was divided into strand-specific 50 bp windows at 25 bp step intervals and the cytosine density plotted against methylation to investigate any reduction in observed methylation caused by the higher density of cytosines. The plot demonstrates that there are no extreme biases against high density cytosine methylated regions.

**Supplemental Figure 13**

**A**

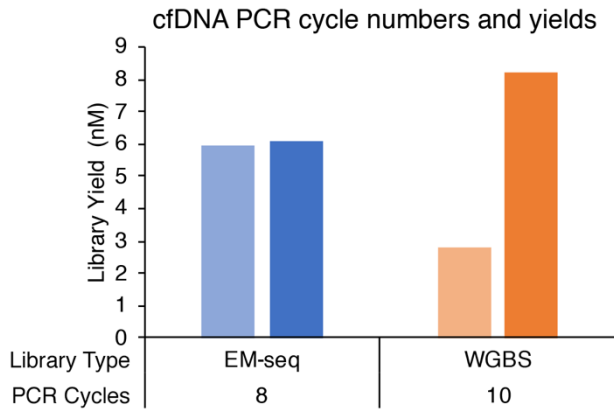

**B**

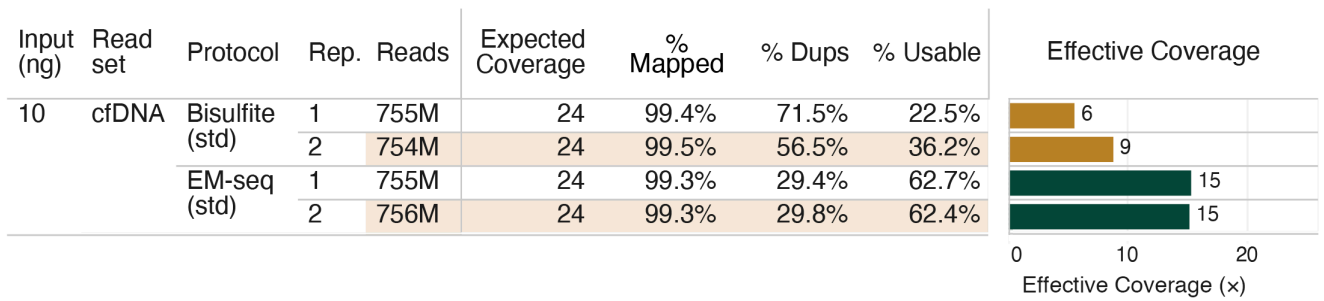

**C**

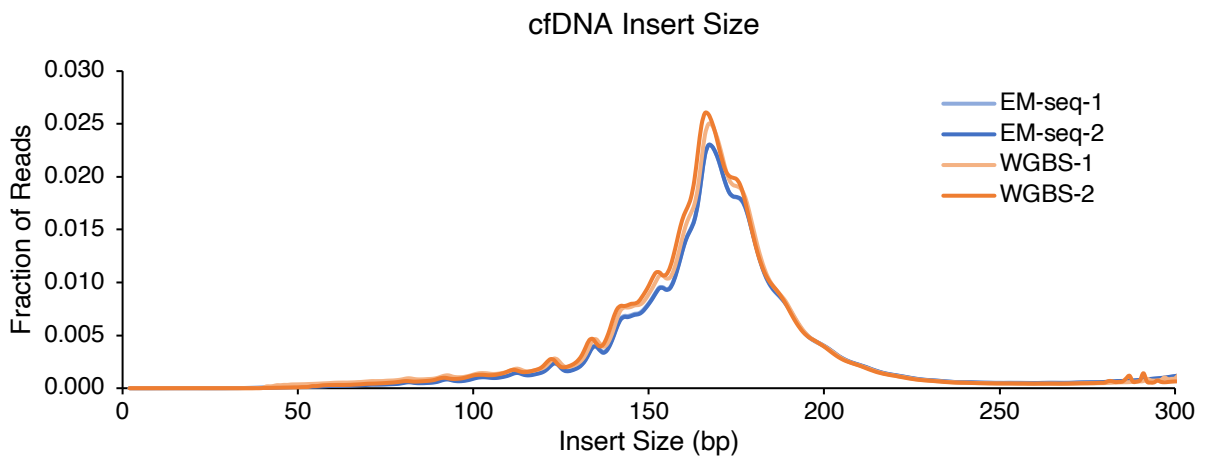

D

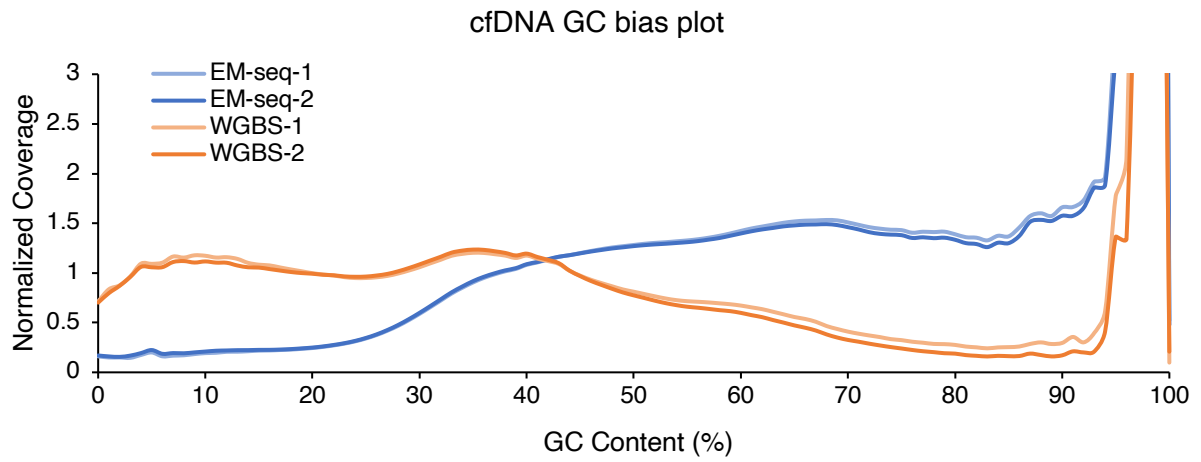

E

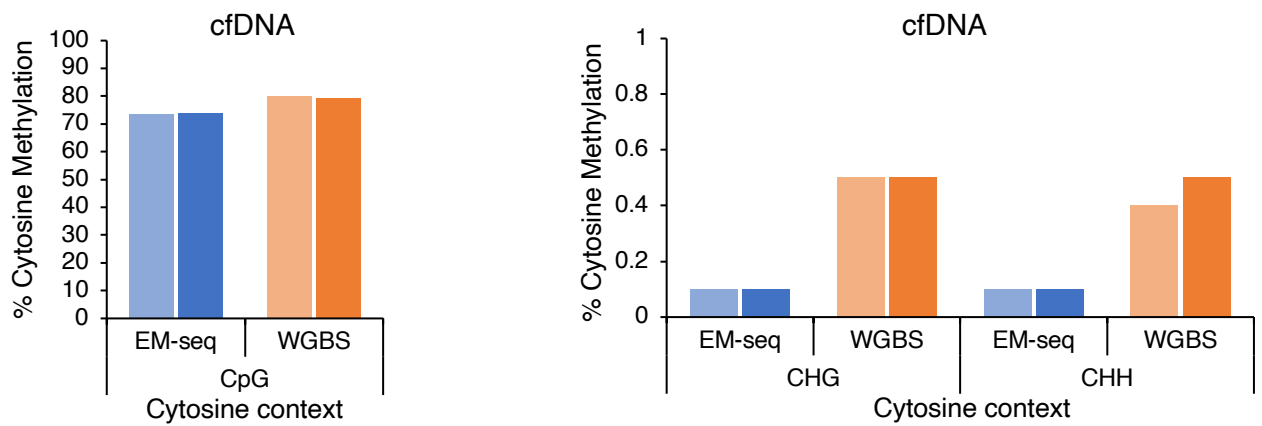

F

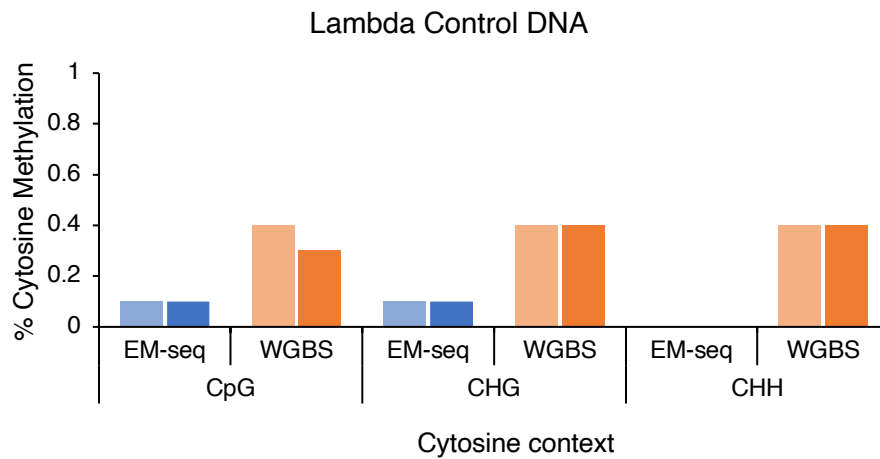

**G**

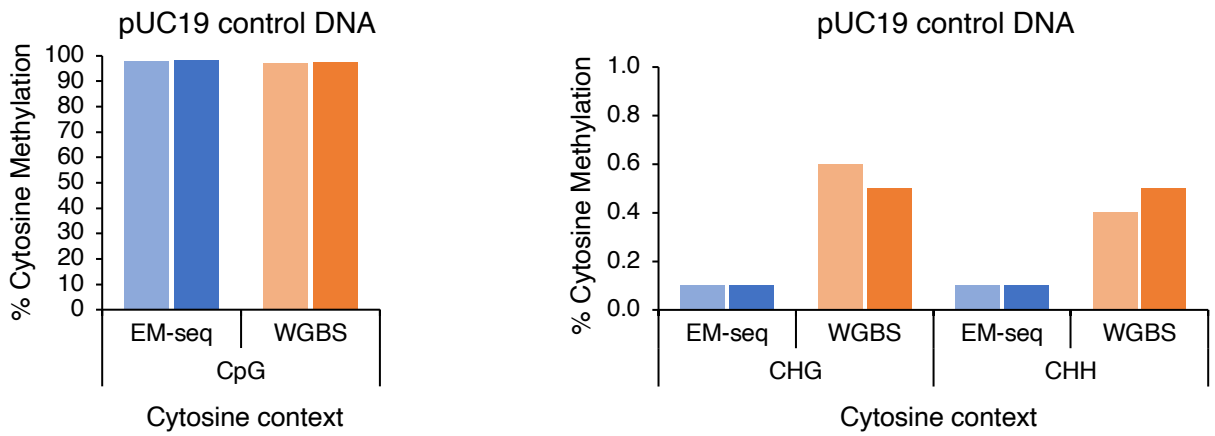

**H**

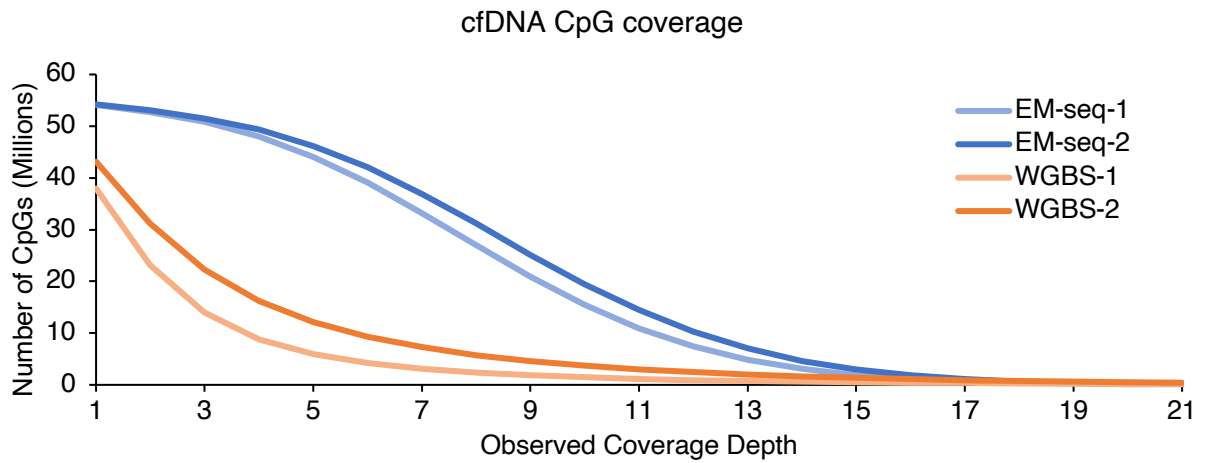

I

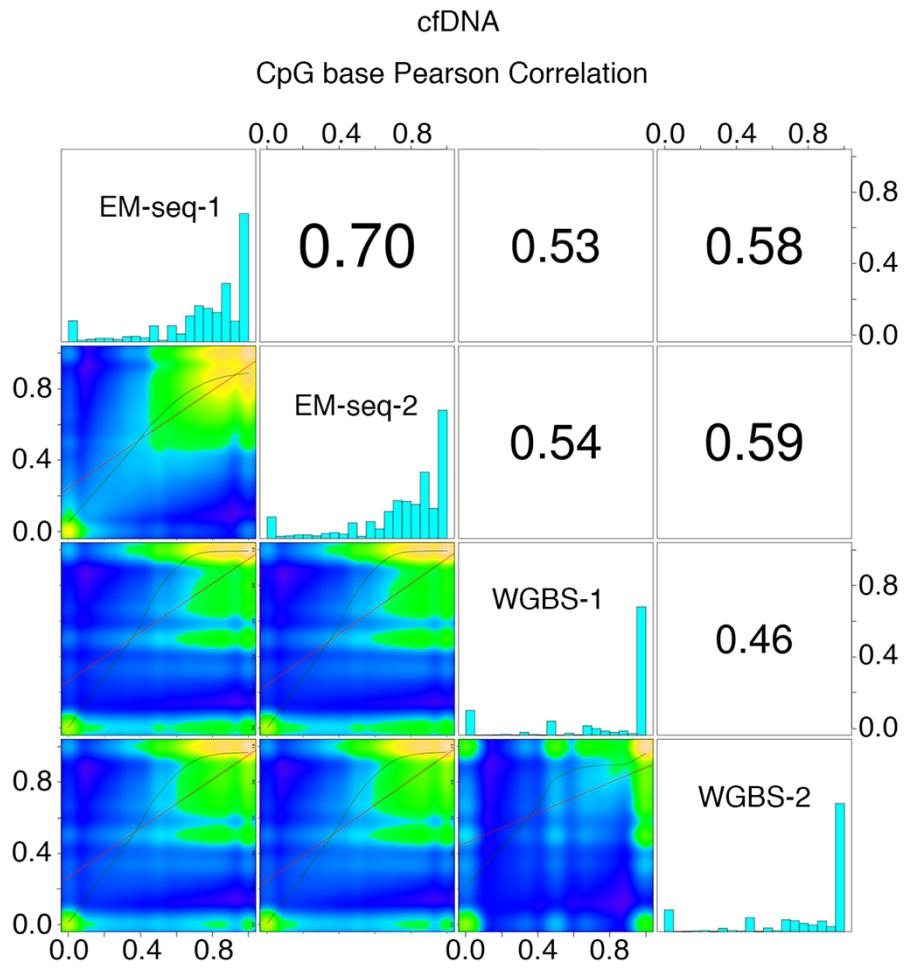

J

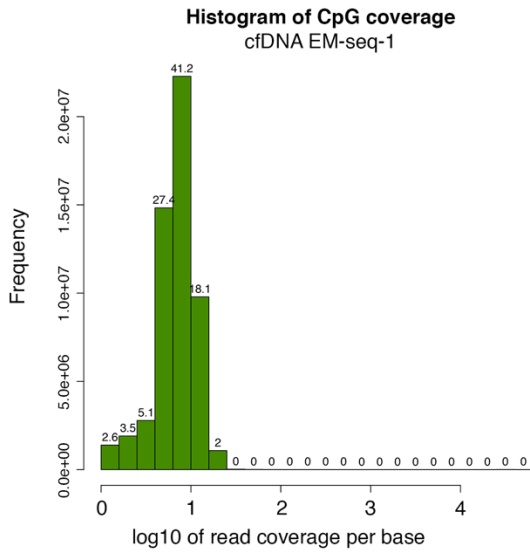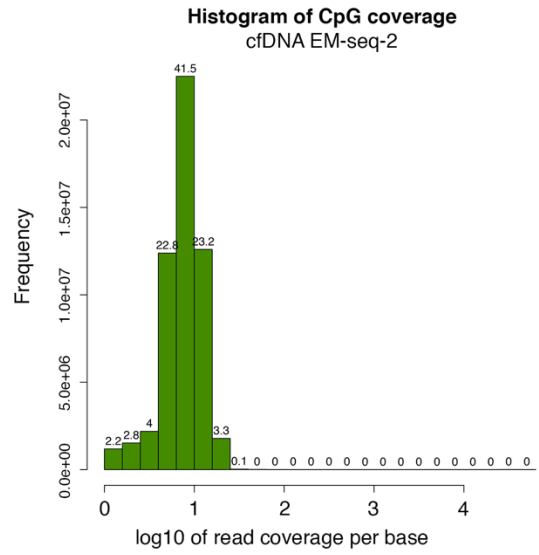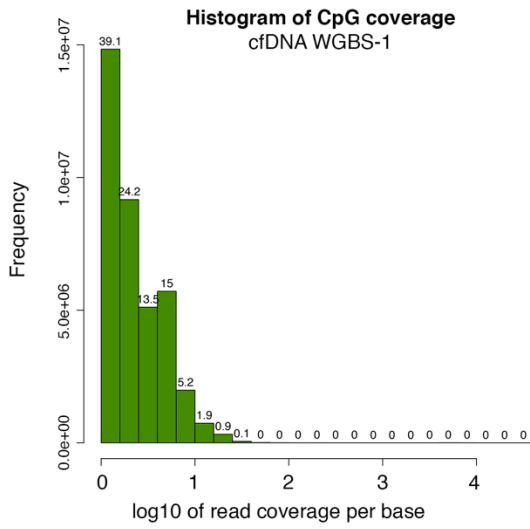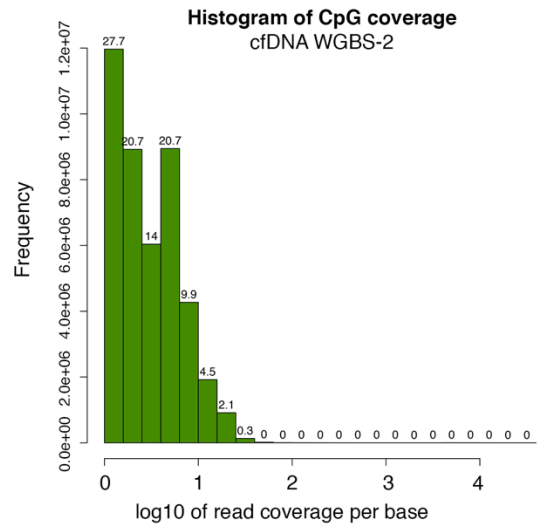

K

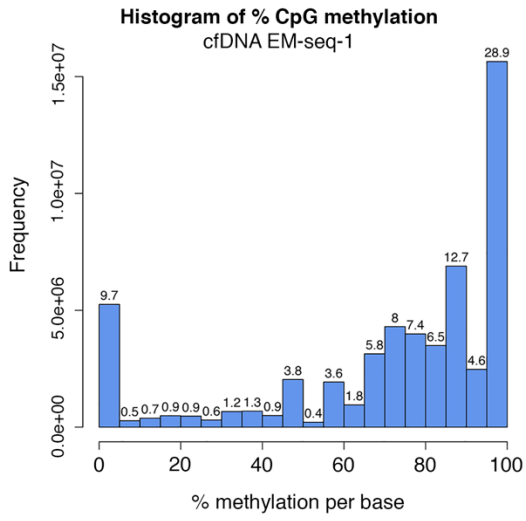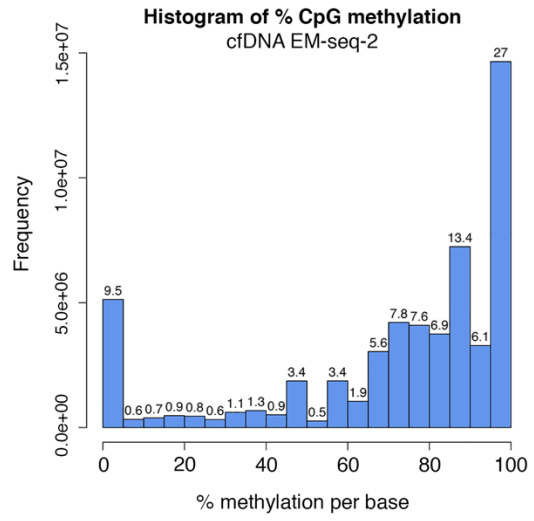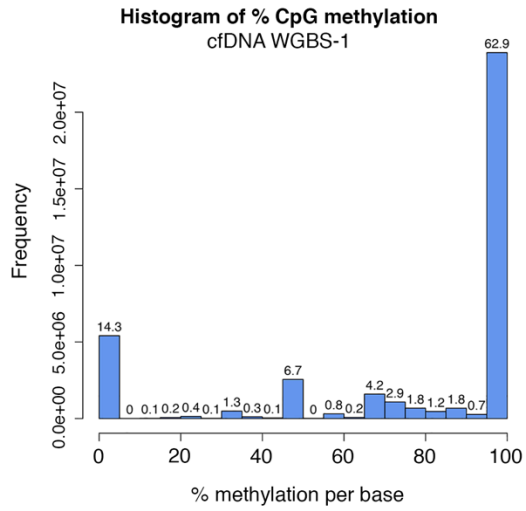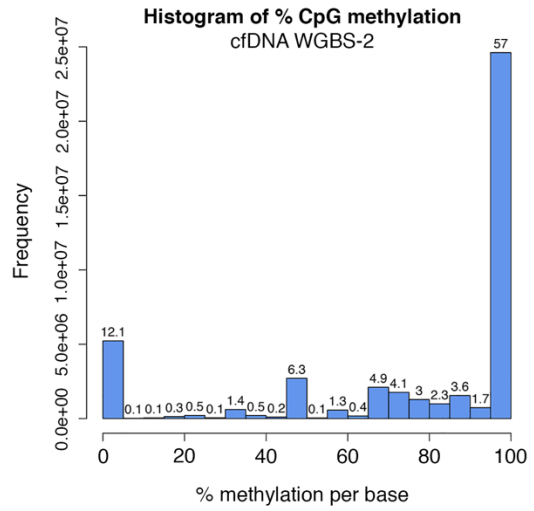



**L**

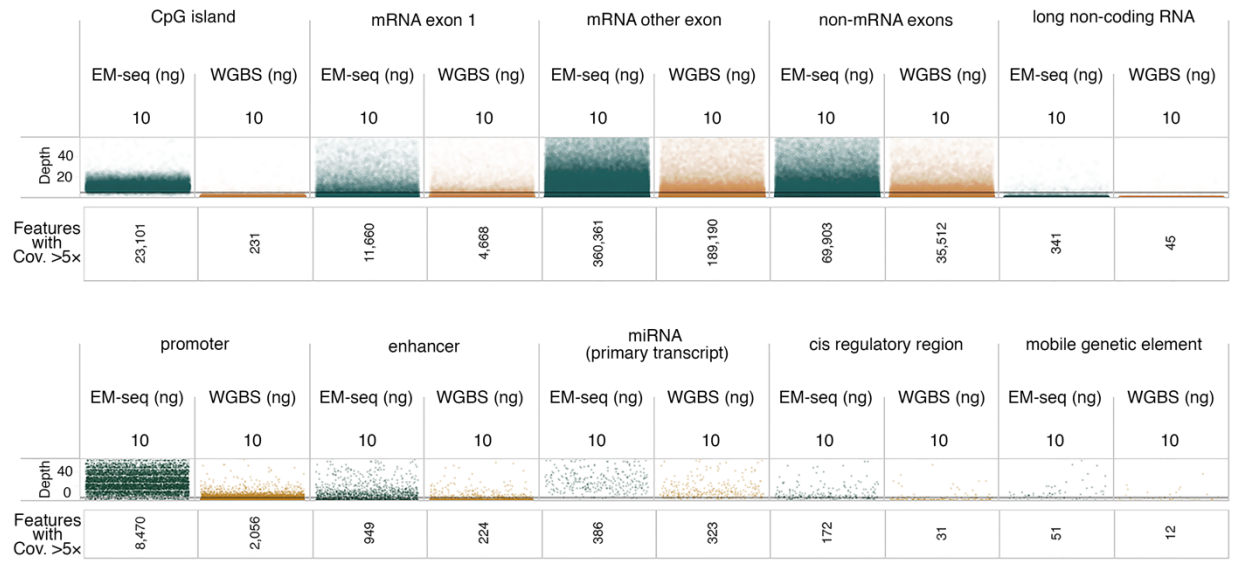

**M**

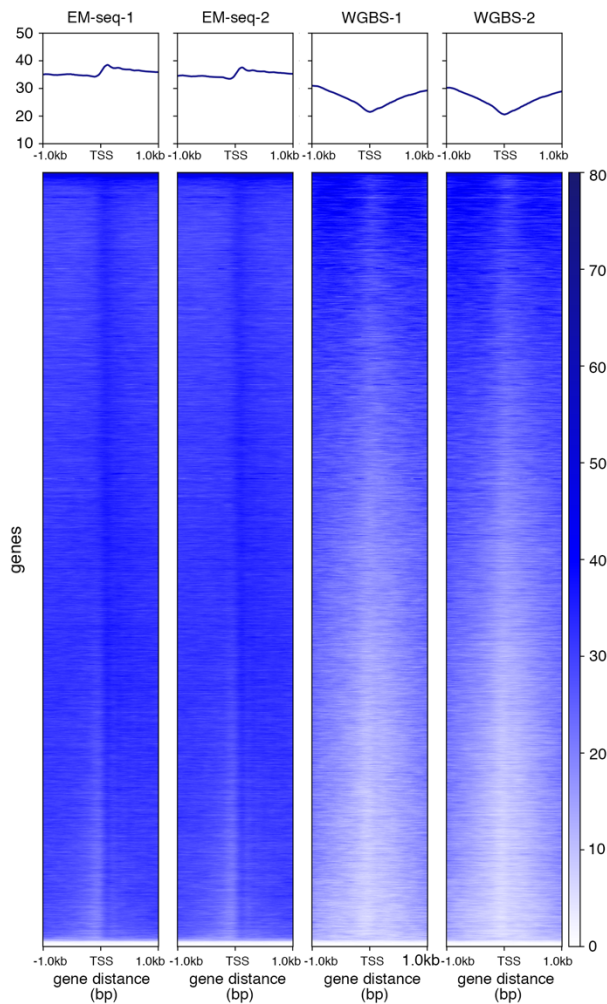

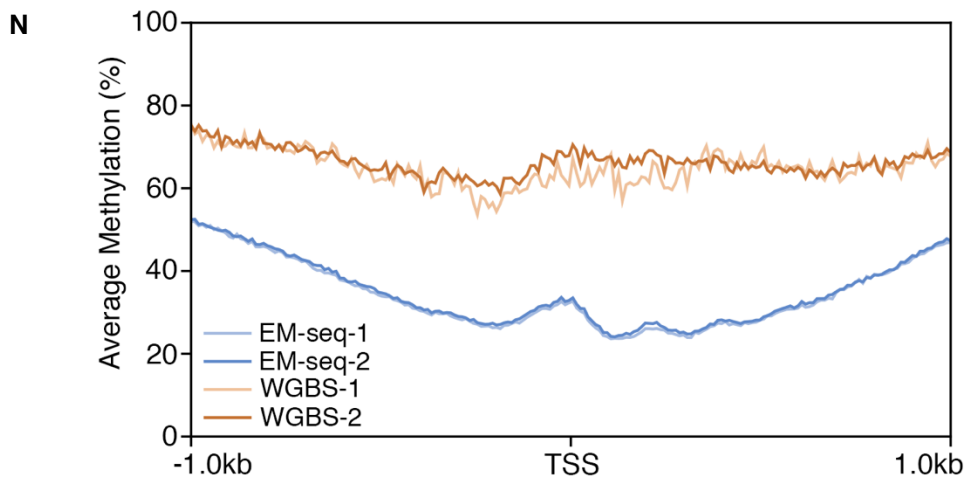

### EM-seq and bisulfite cfDNA libraries

10 ng cfDNA was spiked with control DNA (2 ng unmethylated lambda DNA and 0.1 ng CpG methylated pUC19) and libraries were made using either EM-seq or the Zymo Gold Bisulfite Kit prepped for Illumina sequencing using NEBNext Ultra II DNA library kit reagents. Libraries were sequenced on an Illumina NovaSeq 6000 and 750 million reads per library were used for analysis. (A) EM-seq uses less PCR cycles but results in more PCR product than WGBS libraries. (B) Table of sequencing and alignment metrics for EM-seq and WGBS libraries using 750 million Illumina reads. Metrics were calculated using bwa-meth, SAMtools, and Picard. Theoretical coverage is calculated using the number of bases sequenced/total bases in the GRCh38 reference. Percent mapped refers to reads aligned to the reference genome (grch38+controls), Percent Dups refers to reads marked as duplicate by Picard MarkDuplicates, Percent Usable refers to the set of Proper-pair, MapQ 10+, Primary, non-Duplicate reads used in methylation calling (SAMtools view -F 0xF00 -q 10). Effective Coverage is the Percent Usable  $\times$  Theoretical coverage. (C) Insert sizes of EM-seq and WGBS libraries. (D) GC-bias plot for EM-seq and WGBS libraries. EM-seq libraries display an even GC distribution while WGBS libraries have an AT-rich and GC-poor profile. (E) cfDNA methylation in CpG, CHG and CHH contexts are similarly represented for EM-seq and WGBS

libraries. (F, G) Methylation state for unmethylated lambda control and CpG methylated pUC19 control DNA. (H) The number of CpGs covered for EM-seq and bisulfite libraries were calculated and graphed at minimum coverage depths of 1× through 21×. (I) MethylKit analysis at a minimum of 1× coverage shows good CpG methylation correlation between the 10 ng EM-seq and WGBS libraries. (J, K) CpG coverage and percent methylation per base data were obtained using methylKit. (L) EM-seq and WGBS cover a diverse range of genomic features but EM-seq libraries exhibit greater coverage of all features examined. Coverage of various genomic feature types are represented with one point per region. The vertical position is defined by the average coverage of the feature. Points are staggered horizontally to avoid too much overlapping. Features from NCBI's RefSeq, the Eukaryotic Promoter, UCSC Table Browser and Dfam are shown and the numbers covered at 5× or greater depth are indicated. (M) deepTool Heat map of CpG coverage for +/- 1 kb of the TSS for the 10 ng inputs for EM-seq and bisulfite libraries at a minimum coverage of 1×. Plots were created using random sampling of the same number of reads raw reads from each library (N) Methylation status for EM-seq and bisulfite libraries using 8× minimum coverage depth. EM-seq libraries show less CpG methylation and more accurately represent the expected CpG methylation pattern.

Supplemental Figure 14

A

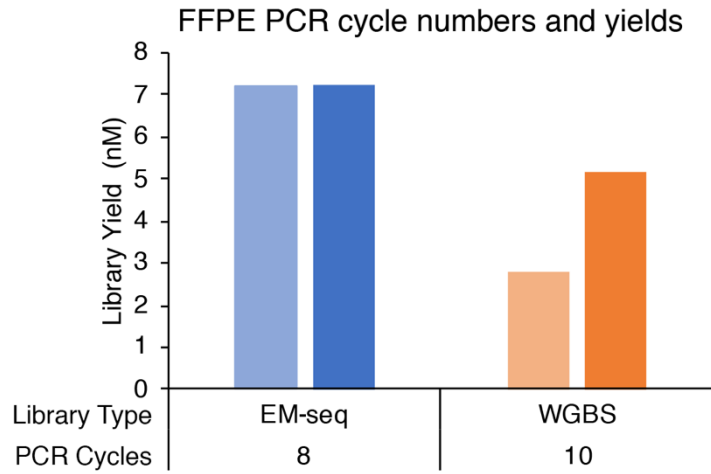

B

| Input (ng) | Read set | Protocol        | Rep. | Reads | Expected Coverage | % Mapped | % Dups | % Usable | Effective Coverage |
|------------|----------|-----------------|------|-------|-------------------|----------|--------|----------|--------------------|
| 10         | FFPE     | Bisulfite (std) | 1    | 755M  | 24                | 99.3%    | 73.8%  | 16.4%    | 4                  |
|            |          |                 | 2    | 754M  | 24                | 99.5%    | 68.4%  | 20.8%    | 5                  |
|            |          | EM-seq (std)    | 1    | 816M  | 26                | 91.9%    | 29.7%  | 48.0%    | 13                 |
|            |          |                 | 2    | 815M  | 26                | 92.0%    | 29.3%  | 48.3%    | 13                 |

Effective Coverage (x) scale: 0, 10, 20

C

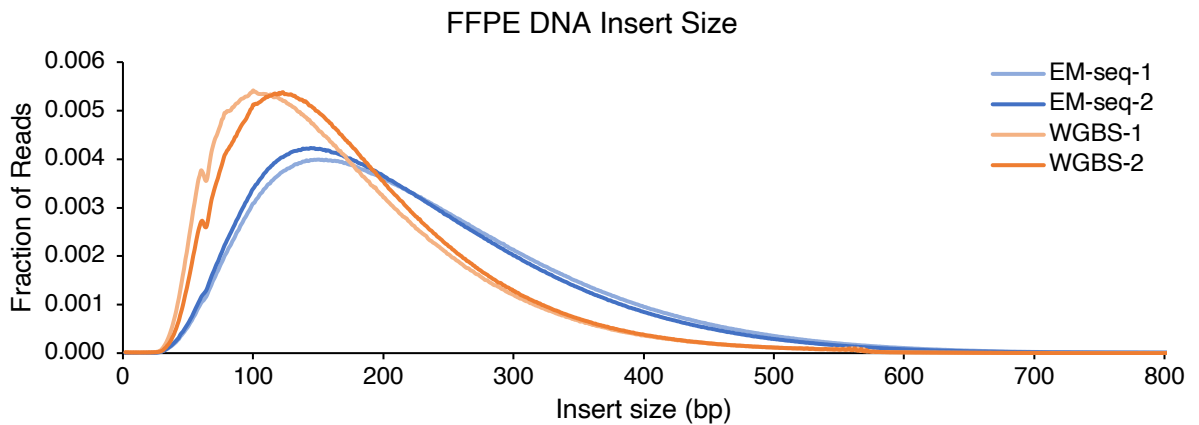

**D**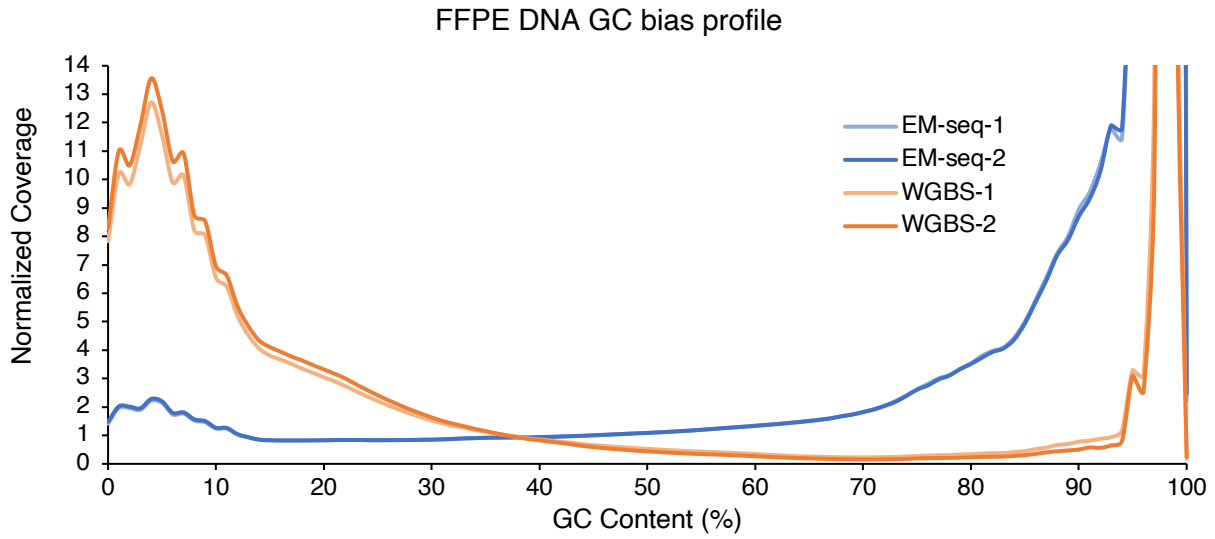**E**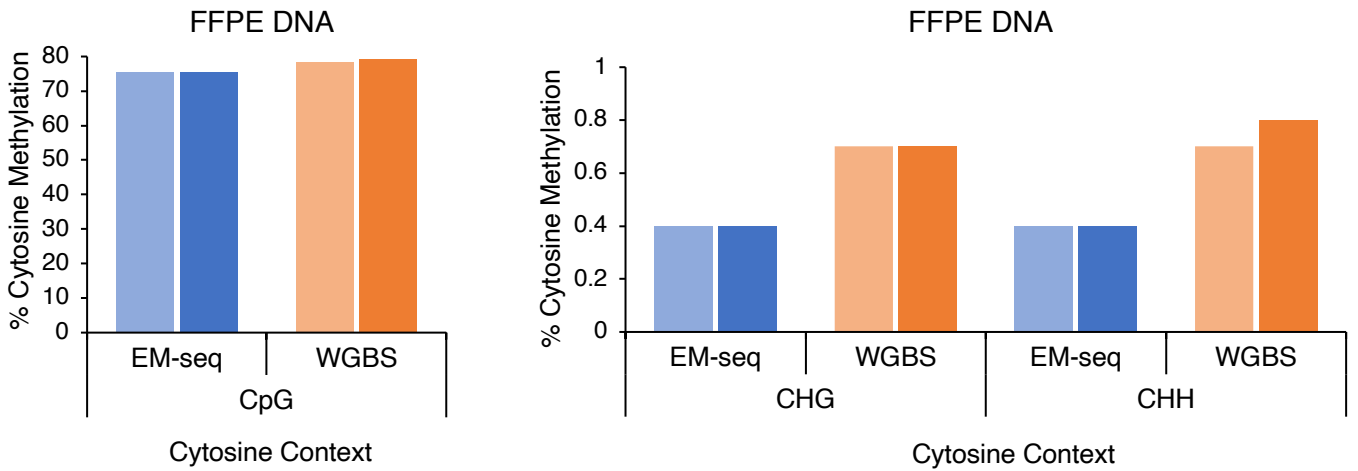**F**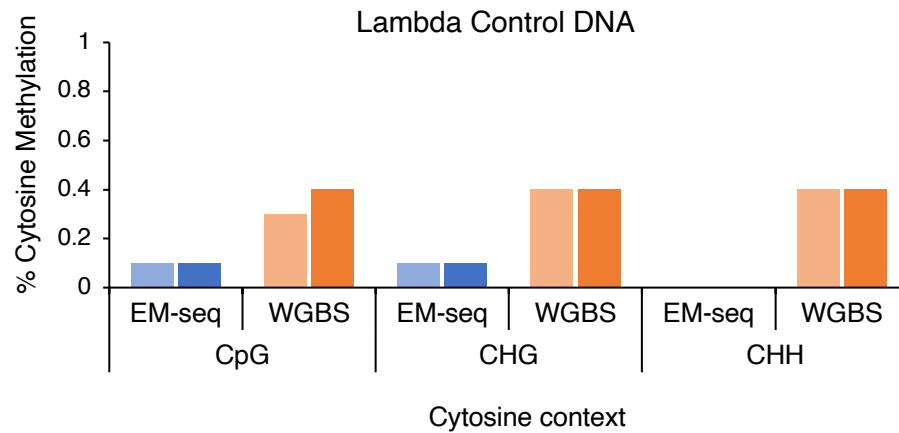

**G**

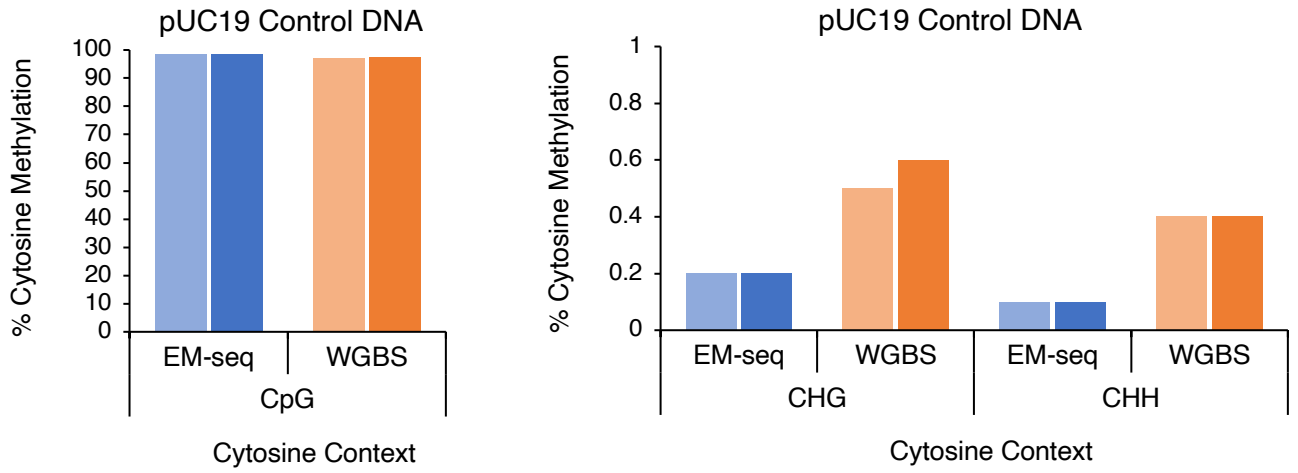

**H**

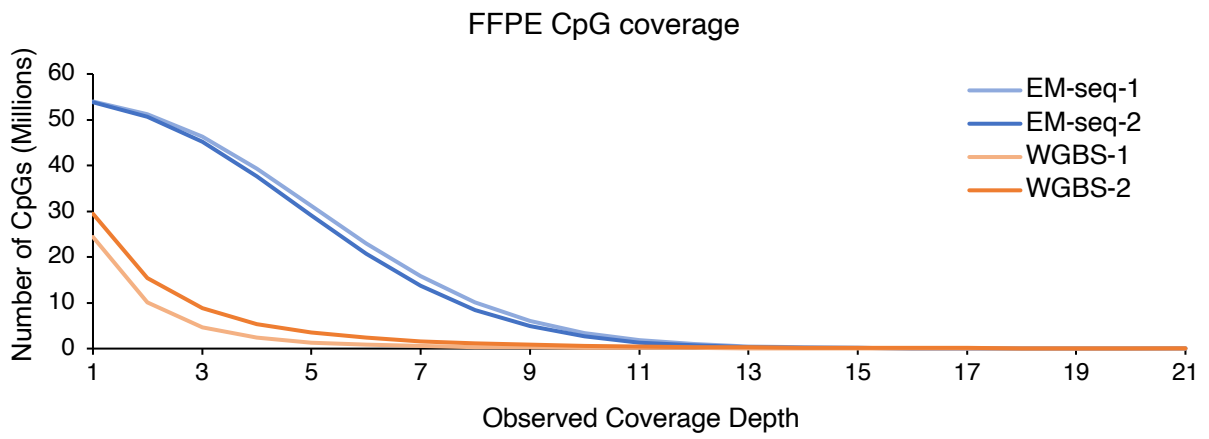

I

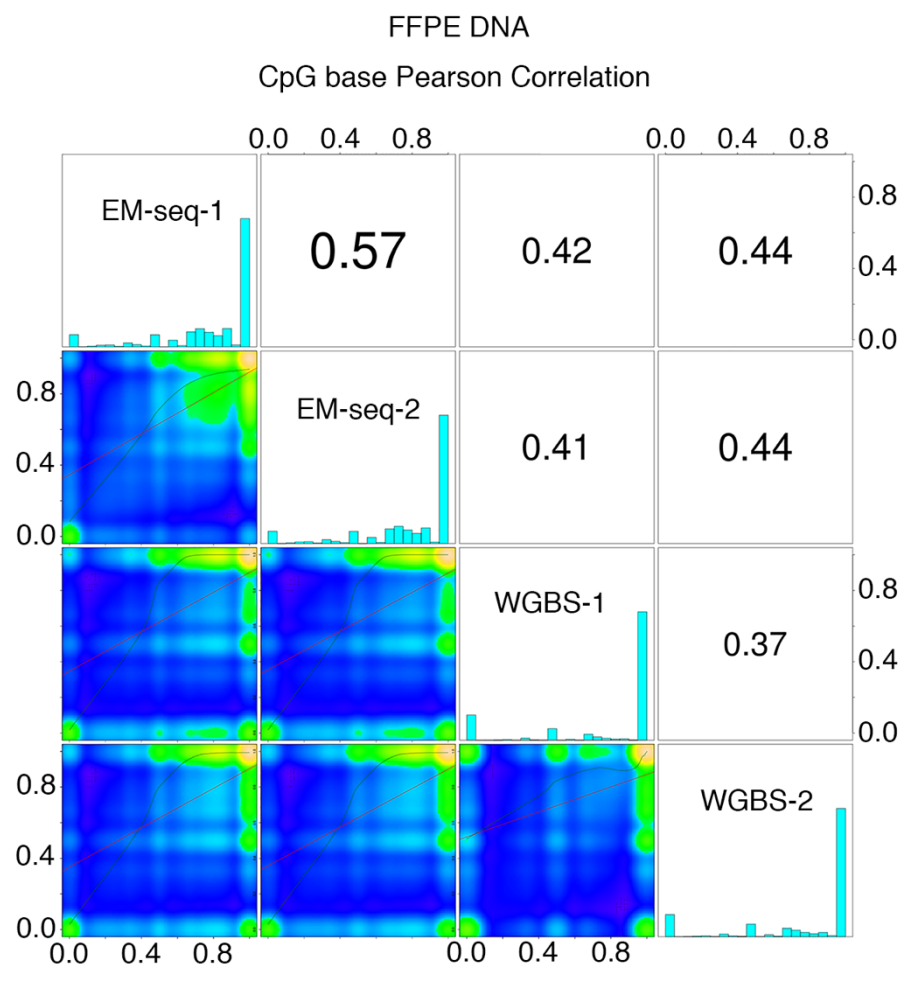

J

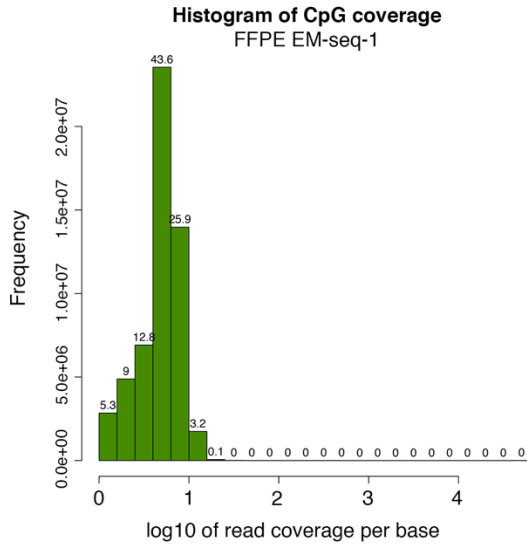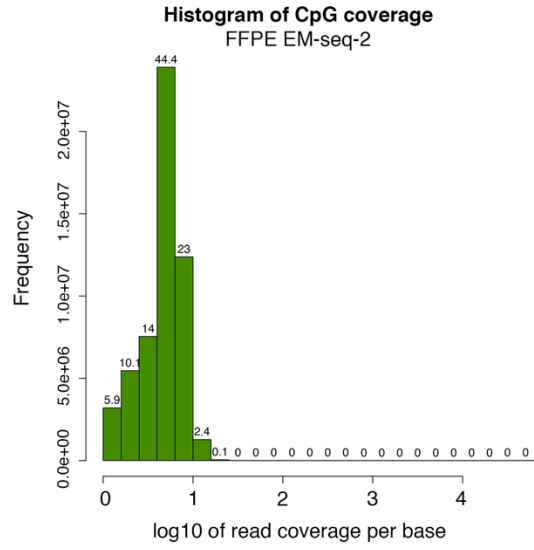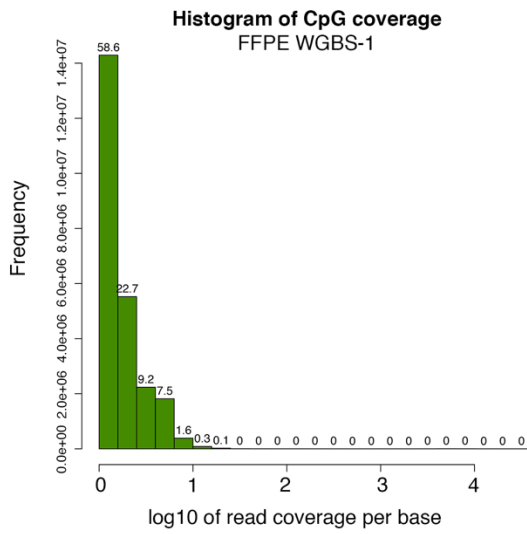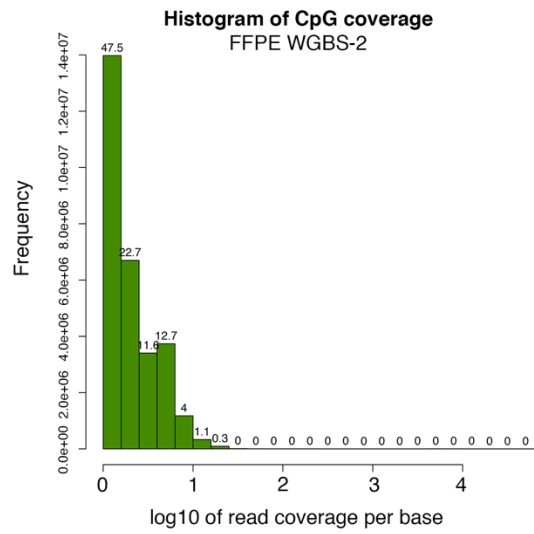



K

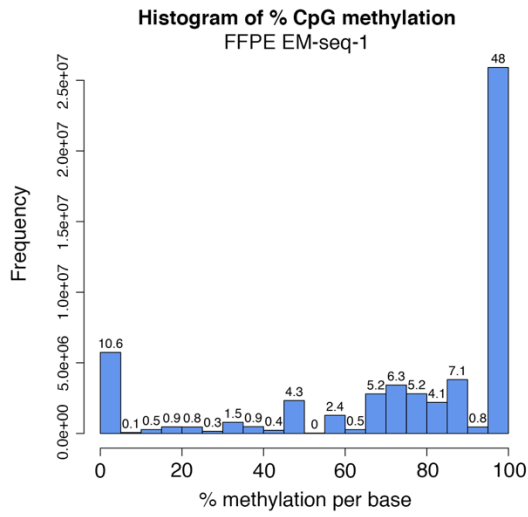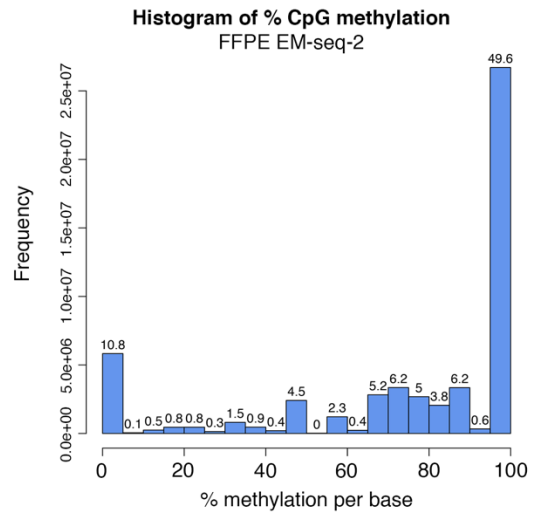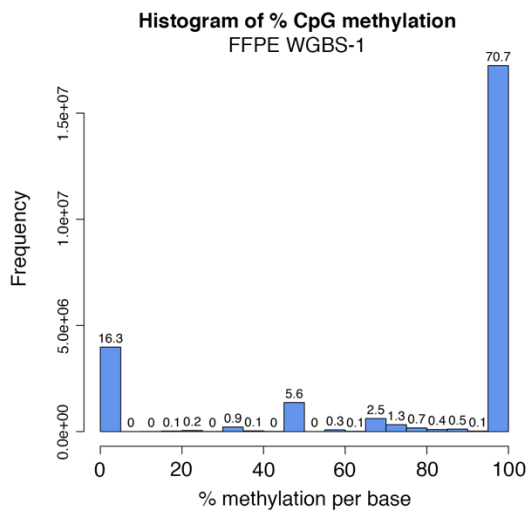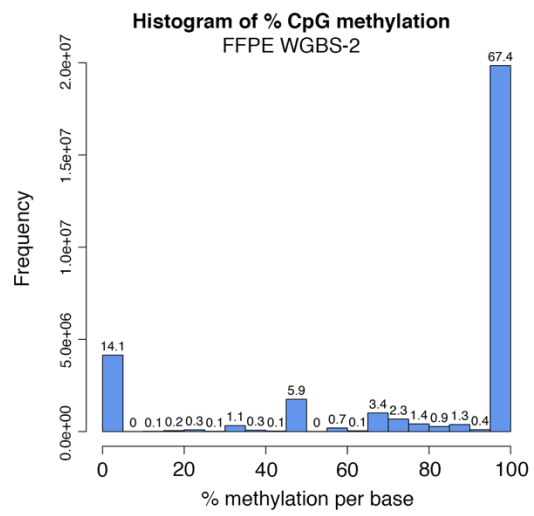

L

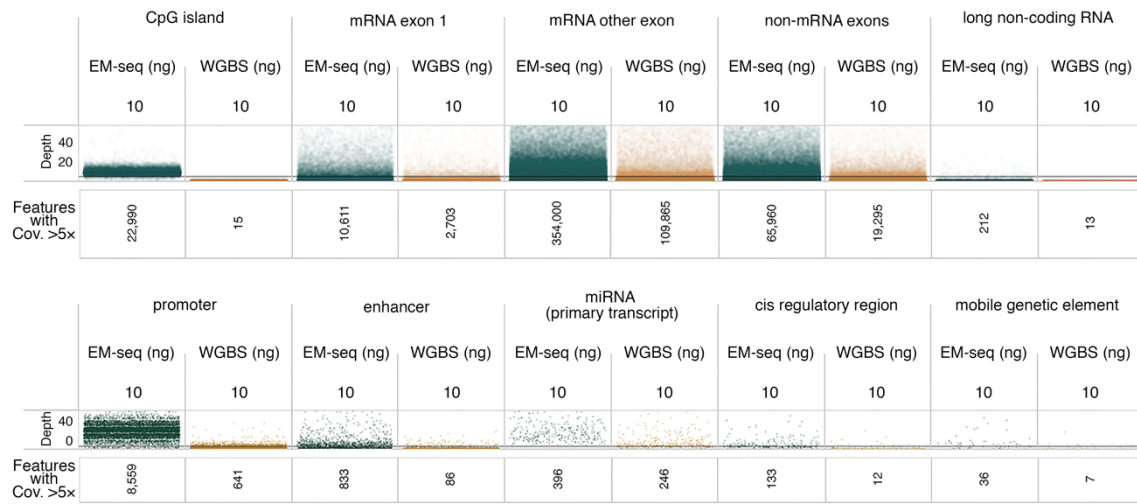

M

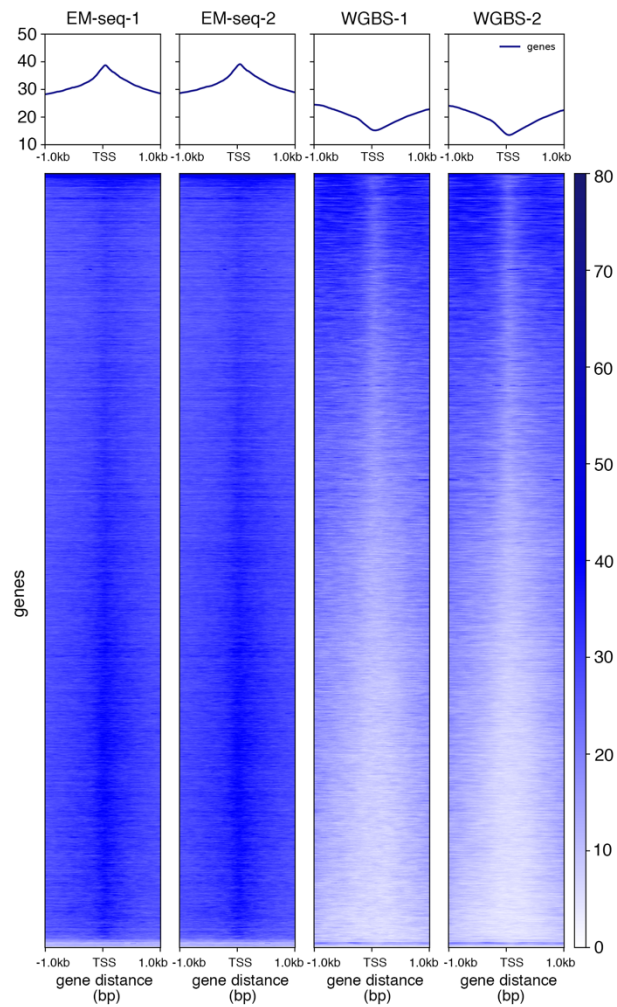

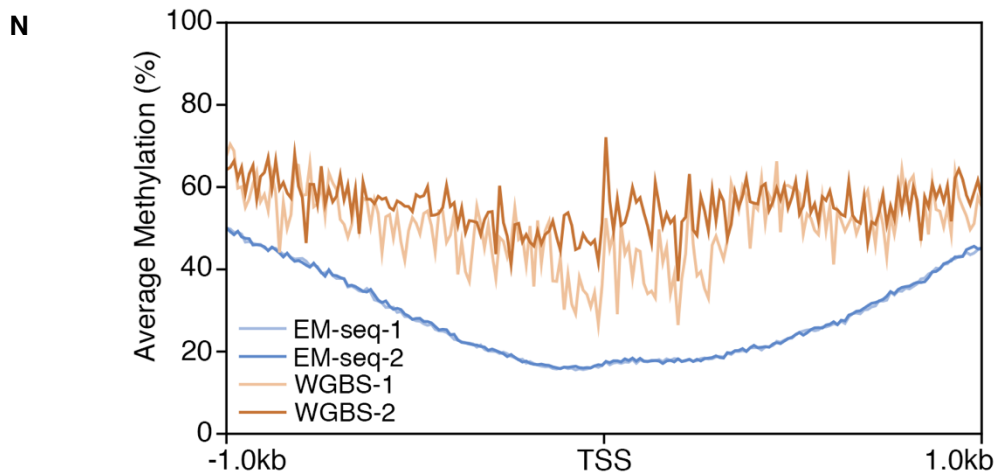

### EM-seq and bisulfite FFPE libraries

10 ng FFPE DNA were spiked with control DNA (2 ng unmethylated lambda DNA and 0.1 ng CpG methylated pUC19) and libraries were made using either EM-seq or the Zymo Gold Bisulfite Kit prepped for Illumina sequencing using NEBNext Ultra II DNA library kit reagents. Libraries were sequenced on an Illumina NovaSeq 6000 and 750 - 810 million reads per library were used for analysis. (A) EM-seq uses less PCR cycles but results in more PCR product than whole genome bisulfite libraries (WGBS). (B) Table of sequencing and alignment metrics for EM-seq and WGBS libraries using 750 million read. Metrics were calculated using bwa-meth, SAMtools, and Picard. Theoretical coverage is calculated using the number of bases sequenced/total bases in the GRCh38 reference. Percent mapped refers to reads aligned to the reference genome (grch38+controls), Percent Dups refers to reads marked as duplicate by Picard MarkDuplicates, Percent Usable refers to the set of Proper-pair, MapQ 10+, Primary, non-Duplicate reads used in methylation calling (SAMtools view -F 0xF00 -q 10). Effective Coverage is the Percent Usable  $\times$  Theoretical coverage. (C) Insert sizes of EM-seq and WGBS libraries. (D) GC-bias plot for EM-seq and WGBS libraries. EM-seq libraries display an even GC distribution while WGBS libraries have an AT- rich and GC- poor profile. (E) cfDNA methylation in CpG, CHG and CHH contexts are similarly represented for EM-seq and WGBS libraries. (F, G) Methylation state for unmethylated lambda control

and CpG methylated pUC19 control DNA. (H) The number of CpGs covered for EM-seq and bisulfite libraries were calculated and graphed at minimum coverage depths of 1× through 21×. (I) MethylKit analysis at a minimum of 1× coverage shows good CpG methylation correlation between the 10 ng EM-seq and WGBS libraries. (J, K) CpG coverage and percent methylation per base data were obtained using methylKit. (L) EM-seq and WGBS cover a diverse range of genomic features but EM-seq libraries exhibit greater coverage of all features examined. Coverage of various genomic feature types are represented with one point per region. The vertical position is defined by the average coverage of the feature. Points are staggered horizontally to avoid too much overlapping. Features from NCBI's RefSeq, the Eukaryotic Promoter, UCSC Table Browser and Dfam are shown and the numbers covered at 5× or greater depth are indicated. (M) deepTool Heat map of CpG coverage for +/- 1 kb of the TSS for the 10 ng inputs for EM-seq and bisulfite libraries at a minimum coverage of 1×. Plots were created using random sampling of the same number of reads raw reads from each library (N) Methylation status for EM-seq and bisulfite libraries using 8× minimum coverage depth. EM-seq libraries show less CpG methylation and more accurately represent the expected CpG methylation pattern.

### Supplemental Figure 15

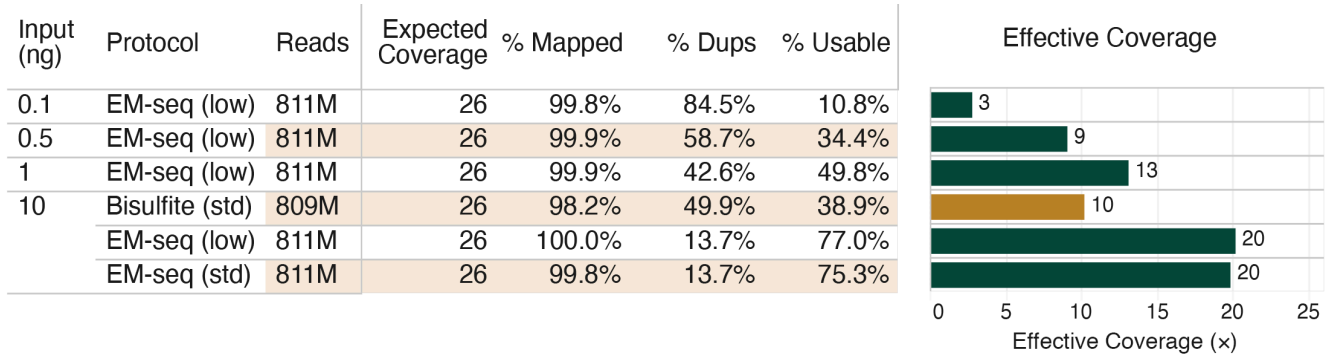

### Sequencing Metrics for Low Input EM-seq Libraries

EM-seq libraries were made using 100 pg, 500 pg, 1 ng and 10 ng of NA12878 genomic DNA. Libraries were sequenced on an Illumina NovaSeq 6000, replicates combined, and 810 million total reads per library were used for analysis. Sequencing and alignment metrics for EM-seq libraries are shown. For the 10 ng inputs, the low input EM-seq method metrics were compared to libraries made using the standard EM-seq method and sodium bisulfite conversion. Metrics were calculated using bwa-meth, SAMtools, and Picard. Theoretical coverage is calculated using the number of bases sequenced/total bases in the GRCh38 reference. Percent mapped refers to reads aligned to the reference genome (grch38+controls), Percent Dups refers to reads marked as duplicate by Picard MarkDuplicates, Percent Usable refers to the set of Proper-pair, MapQ 10+, Primary, non-Duplicate reads used in methylation calling (SAMtools view -F 0x000-q 10). Effective Coverage is the Percent Usable  $\times$  Theoretical coverage.

Supplemental Figure 16

A

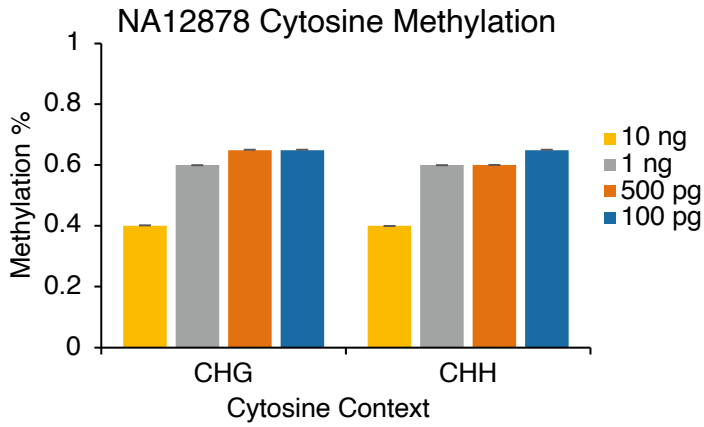

B

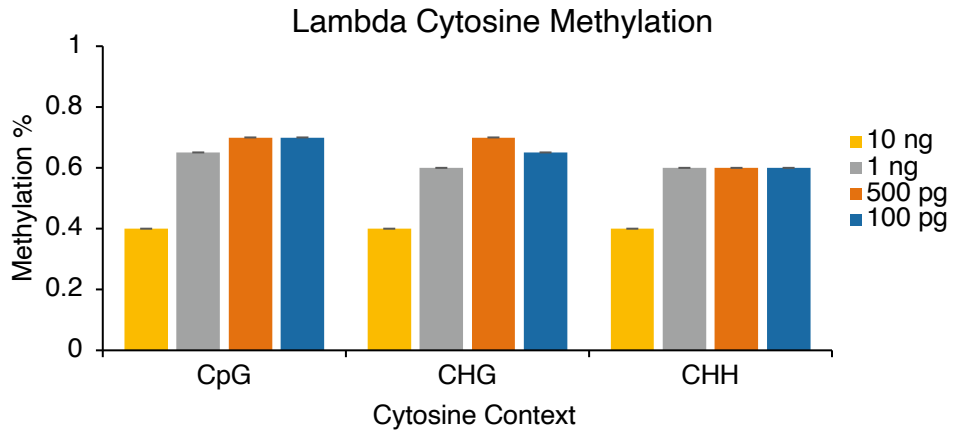

C

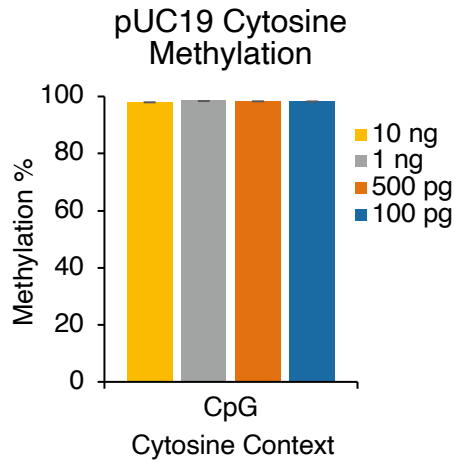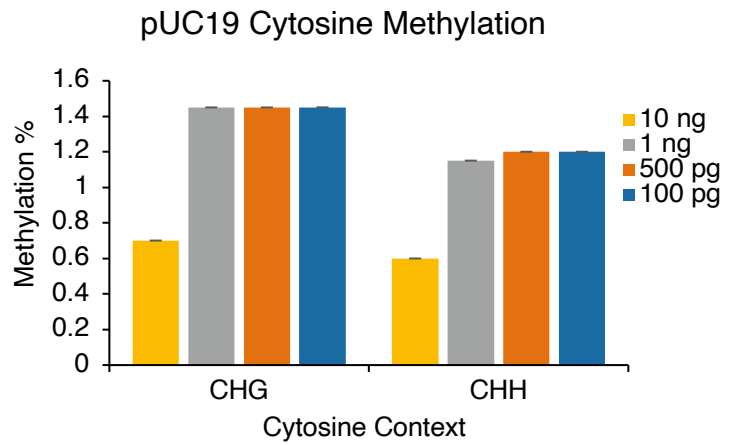

### **Low Input EM-seq Libraries, Cytosine Methylation of Lambda and pUC19 internal controls**

(A) NA12878 DNA cytosine methylation in CHG and CHH contexts. (B) Methylation of cytosines in the unmethylated lambda controls. EM-seq has <1% methylation in CpG, CHG and CHH contexts. (C) Methylation of cytosines in the CpG methylated pUC19 control. EM-seq and WGBS have approximately 97% methylation in the CpG context and around 1% in the CHG and CHH contexts.

## Supplemental Figure 17

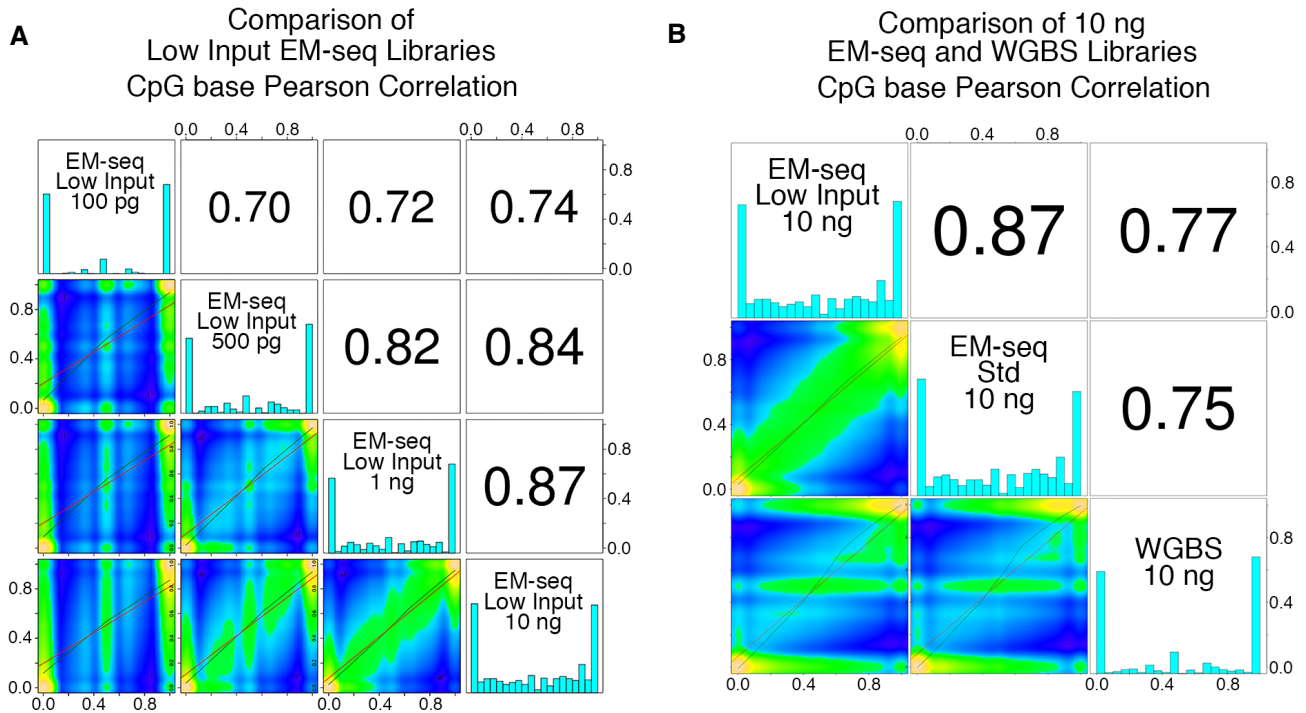

### Correlations between lower DNA input EM-seq Libraries

Correlations were plotted using methylKit for EM-seq libraries made using NA12878 genomic DNA. (A) MethylKit correlations for 100 pg, 500 pg, 1 ng, and 10 ng NA12878 EM-seq libraries at 1× minimum coverage. Correlations remain strong between libraries but are reduced when considering the 100 pg DNA input. (B) Correlations for 10 ng NA12878 DNA libraries. Data was from low input EM-seq, standard EM-seq and WGBS libraries. The correlation between the two EM-seq methods is higher than for those observed using WGBS.



## Supplemental Figure 18

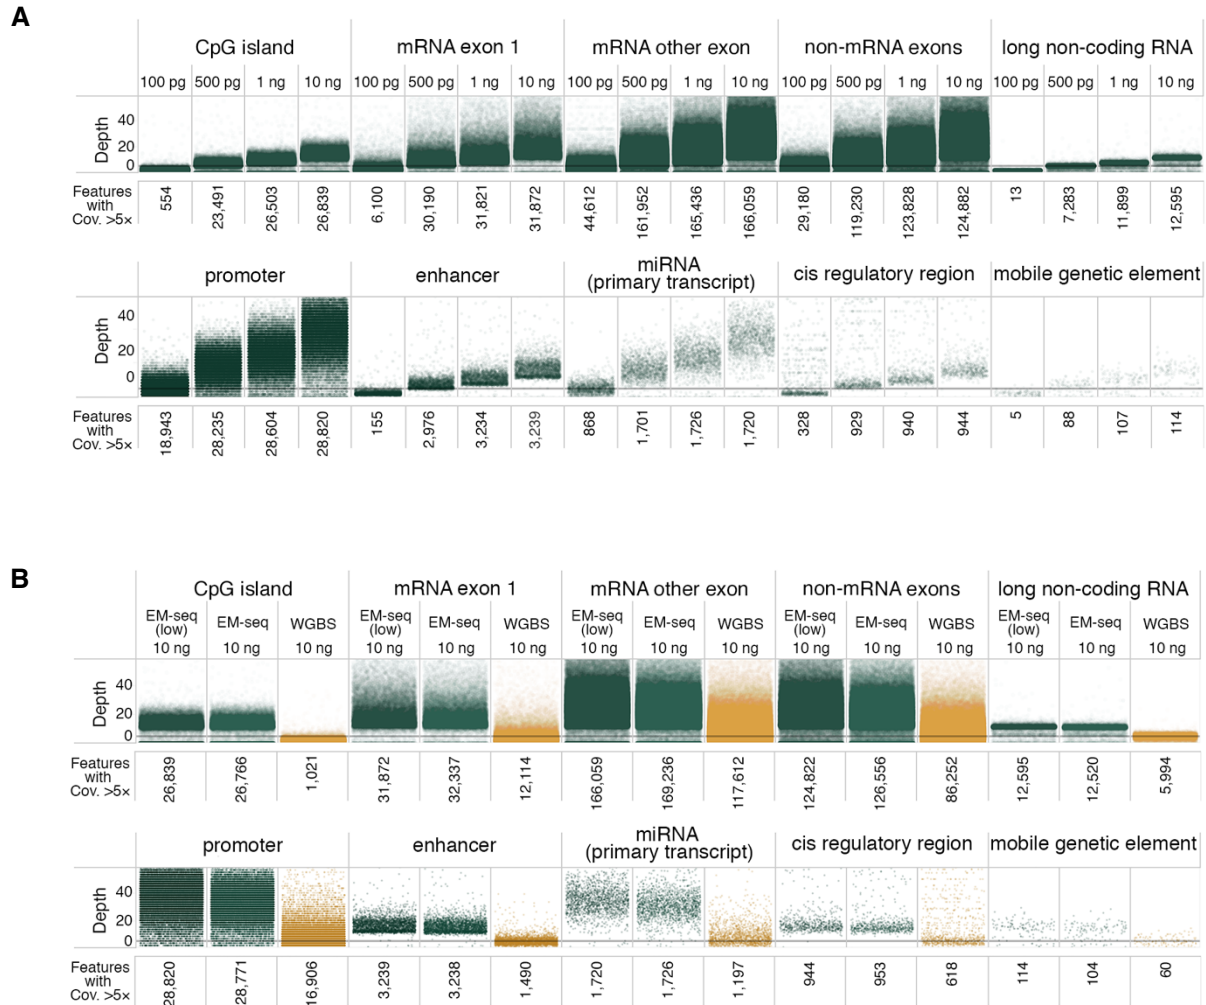

### Low Input EM-seq determines methylation status of cytosines at key genomic features

Two technical replicates were combined before randomly selecting reads from each library to produce comparable sets of 810 million total human reads. These were analyzed for each library and annotated using featureCounts. (A) The number of genomic features identified at a coverage depth of >5 $\times$  is similar for 500 pg, 1 ng, and 10 ng DNA inputs. The 100 pg input library has fewer genomic features identified (likely due to lower library complexity at this extreme input amount) (B) Comparison of genomic

features identified from 10 ng NA12878 DNA libraries. Data was from low input EM-seq, standard EM-seq and WGBS libraries. A wide range of genomic features at  $>5\times$  coverage were identified. For EM-seq, the same number of genomic features were identified regardless of low input or standard library preparation method. The number of genomic features in each of the categories was less for WGBS libraries compared to EM-seq libraries.

Supplemental Figure 19

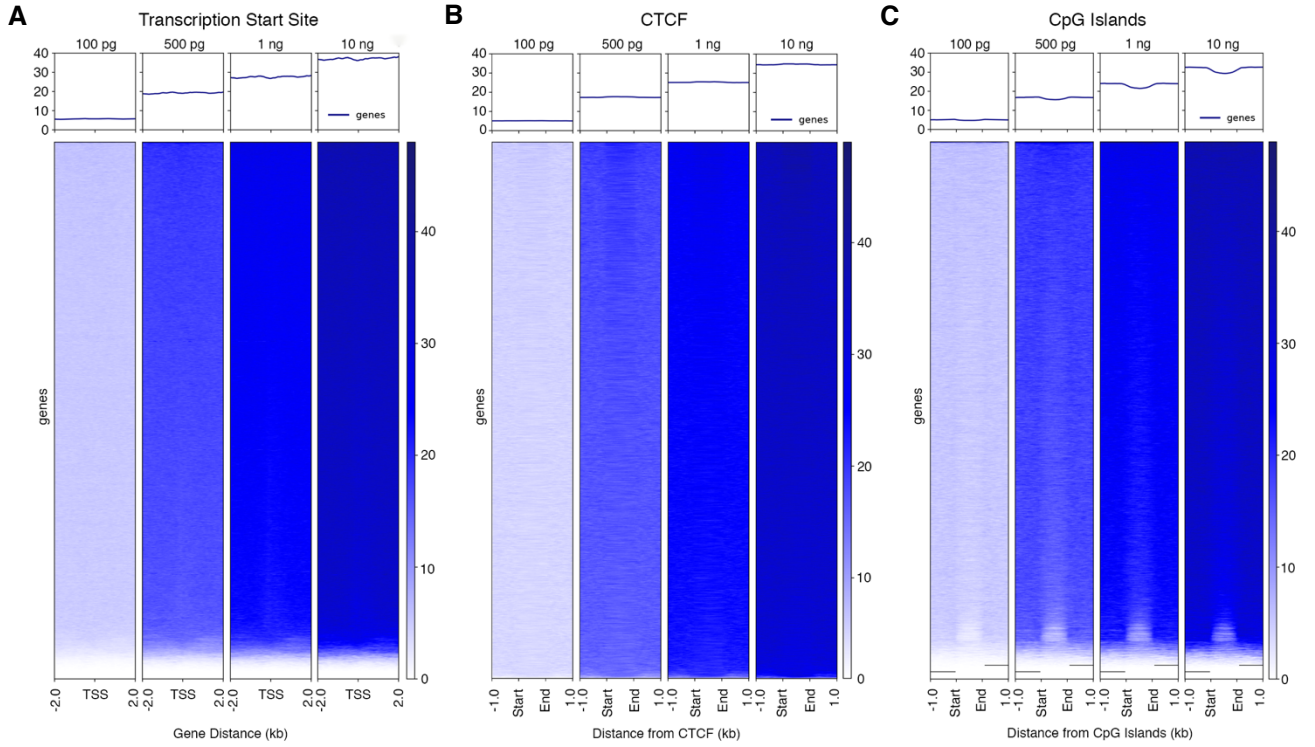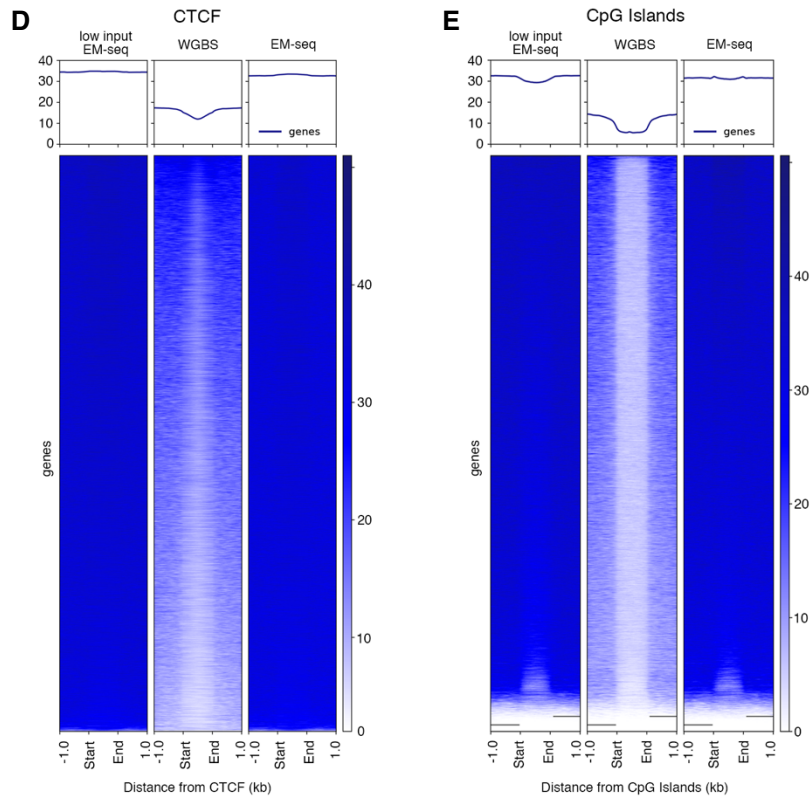

### **EM-seq provides greater coverage of CpGs over genomic features**

deepTools heat maps representing CpG coverage across genomic features including transcription start sites (TSS), CTCF sites, and CpG islands. (A-C) Heat maps for 100 pg, 500 pg, 1 ng and 10 ng DNA inputs showing coverage around TSS, CTCF and CpG islands. Coverage is even across the features at all inputs.

(D, E) Heat maps for 10 ng DNA inputs comparing coverage of genomic features using libraries prepared using low input EM-seq, standard EM-seq and WGBS. Data from low input and standard EM-seq prepped libraries show similar even coverage. WGBS does not have the same evenness of coverage.

Supplemental Figure 20

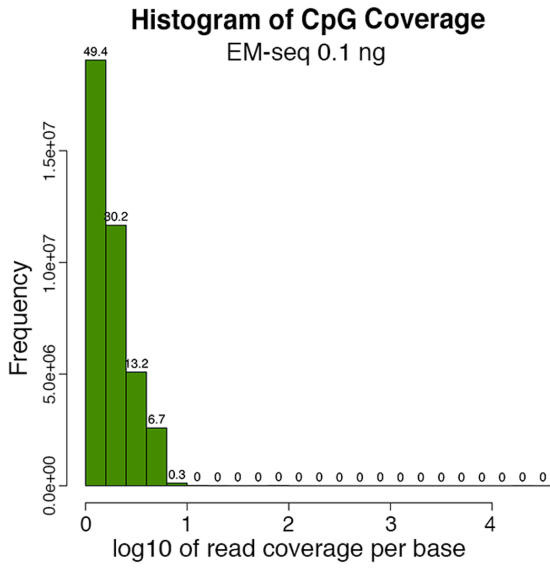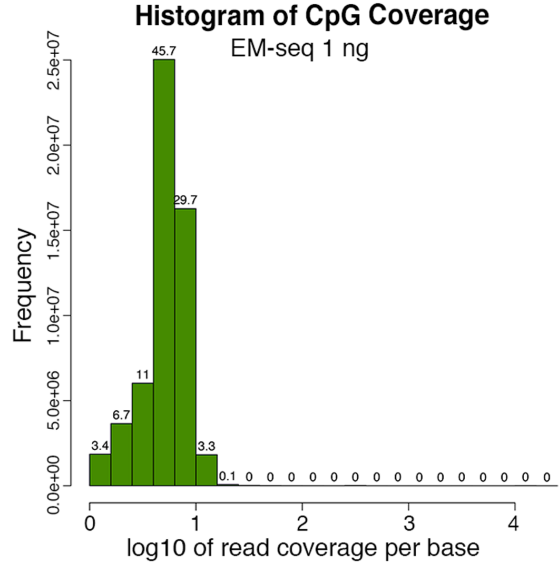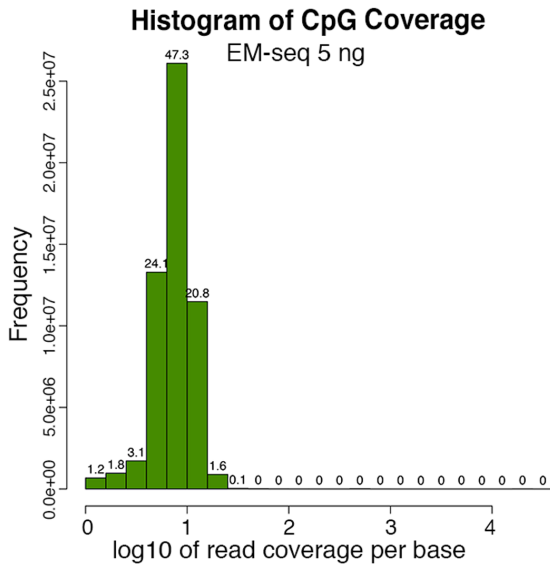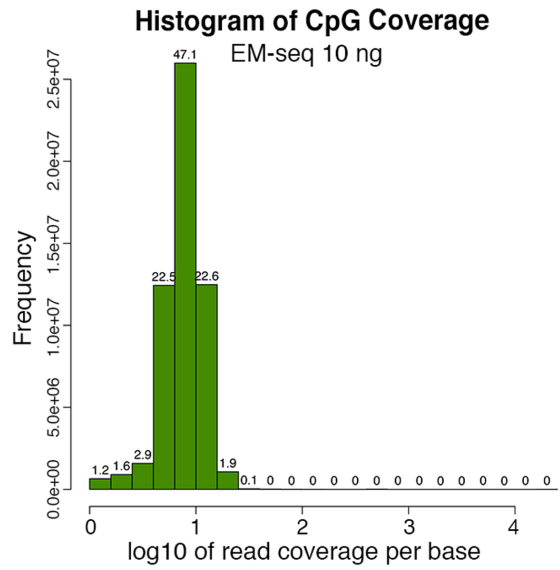

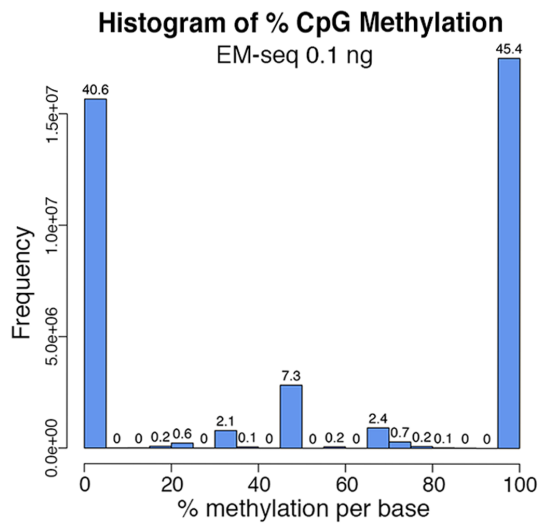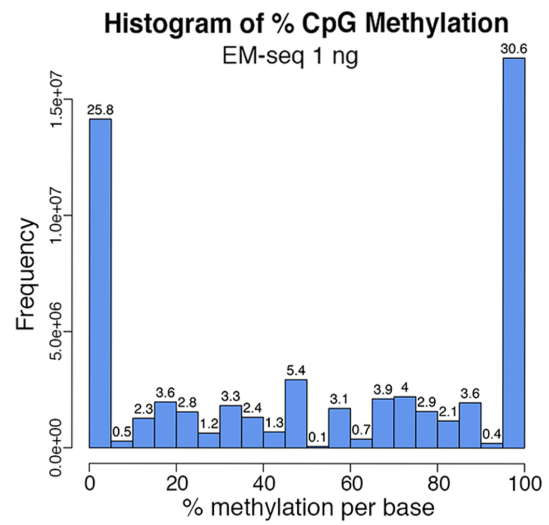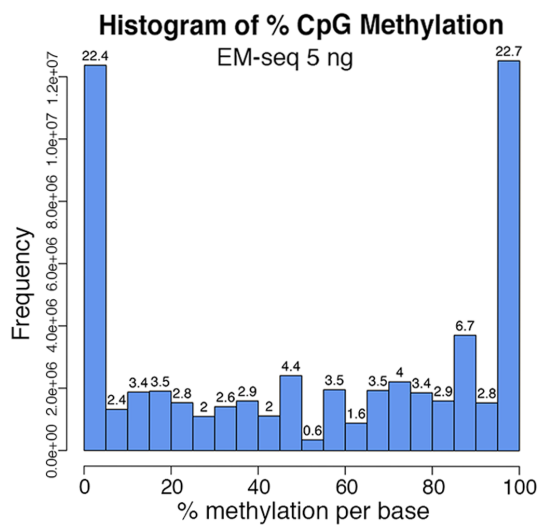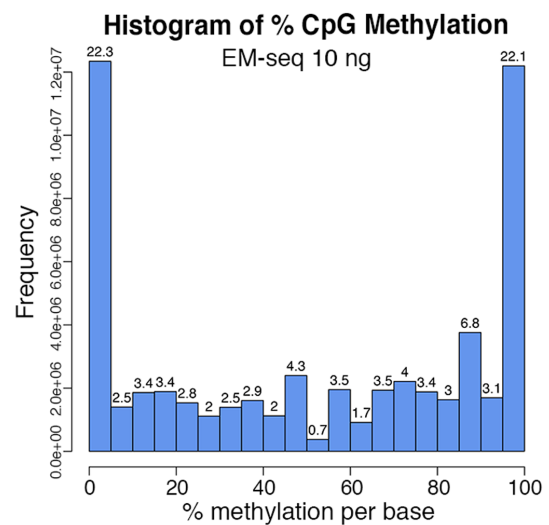

**CpG coverage and methylation for low input libraries**

The coverage and methylation status of CpGs were extracted using MethylDackel and plotting using methylKit for 100 pg, 500 pg, 1 ng and 10 ng NA12878 DNA inputs. There is deeper coverage for higher DNA inputs. Methylation profiles are as expected, with highest representation of CpG methylation at 0% and 100%.

**Supplemental Figure 21**

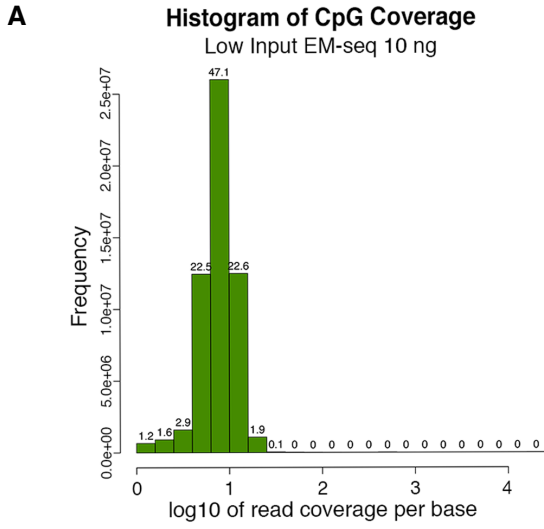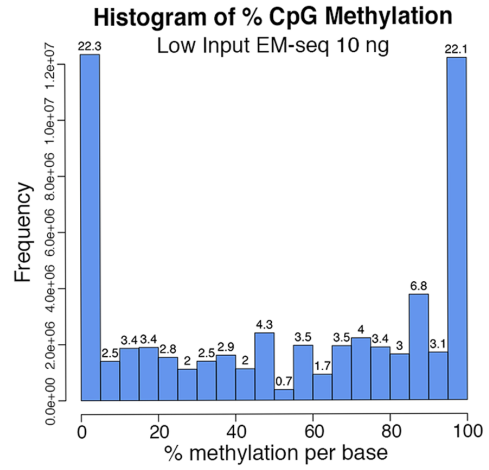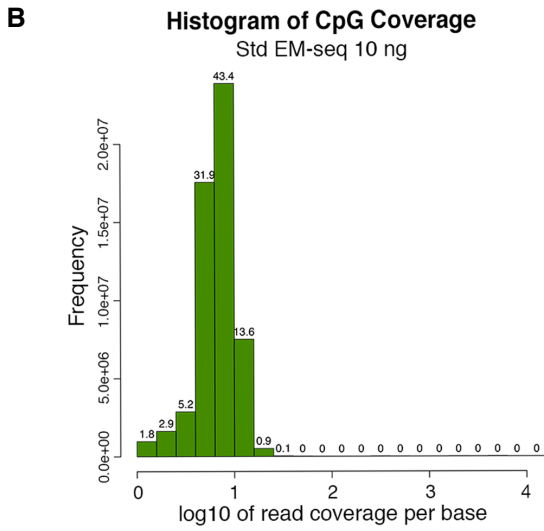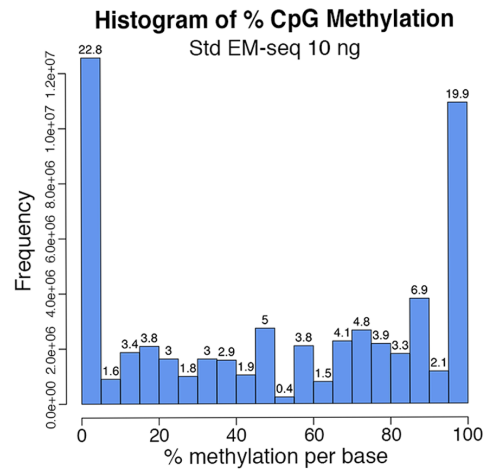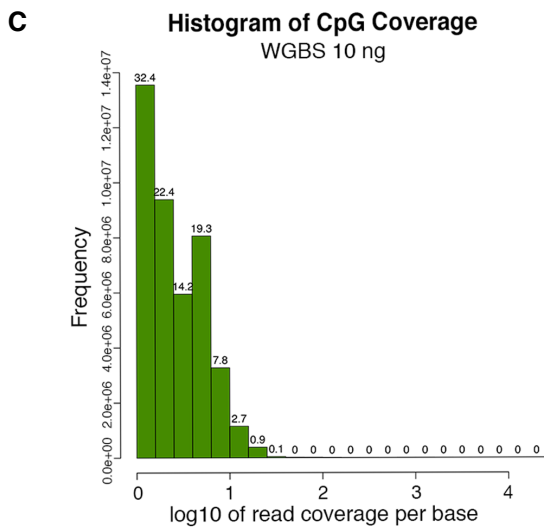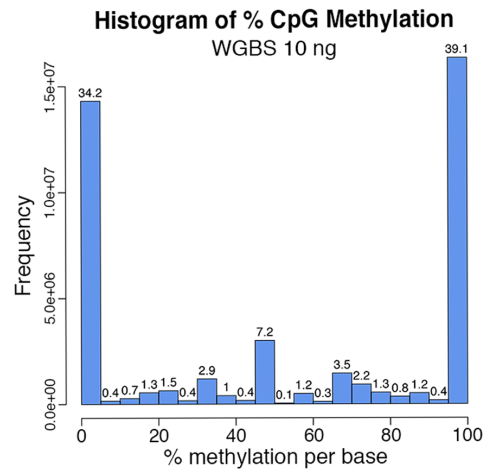

### **Comparison of WGBS, standard EM-seq and low input EM-seq 10 ng DNA input library types**

The coverage and methylation status of CpGs were extracted from MethylDackel output files using methylKit for 10 ng NA12878 genomic DNA inputs. Libraries were made using (A) Low input EM-seq methods (B) Standard EM-seq method and (C) WGBS. Methylation profiles and coverage were similar between the two EM-seq methods with highest representation of CpG methylation at 0% and 100%.



## **Supplemental Tables**

**Supplemental Table 1**

| Pre-nucleotide substrate | Variable Nucleotide | Oligonucleotide Sequence                                  |
|--------------------------|---------------------|-----------------------------------------------------------|
| A                        | C                   | ATAAGAATAGAATGAA <u>C</u> CGTGAAATGAATATGAAATGAATAGTA     |
| G                        | C                   | ATAAGAATAGAATGAA <u>G</u> CGTGAAATGAATATGAAATGAATAGTA     |
| T                        | C                   | ATAAGAATAGAATGAA <u>T</u> CGTGAAATGAATATGAAATGAATAGTA     |
| U                        | C                   | ATAAGAATAGAATGAA <u>U</u> CGTGAAATGAATATGAAATGAATAGTA     |
| 5mC                      | C                   | ATAAGAATAGAATGAA/ <u>5mC</u> /CGTGAAATGAATATGAAATGAATAGTA |
| A                        | 5mC                 | ATAAGAATAGAATGAAA/ <u>5mC</u> /GTGAAATGAATATGAAATGAATAGTA |
| G                        | 5mC                 | ATAAGAATAGAATGAAG/ <u>5mC</u> /GTGAAATGAATATGAAATGAATAGTA |
| T                        | 5mC                 | ATAAGAATAGAATGAAT/ <u>5mC</u> /GTGAAATGAATATGAAATGAATAGTA |
| U                        | 5mC                 | ATAAGAATAGAATGAAU/ <u>5mC</u> /GTGAAATGAATATGAAATGAATAGTA |
| C                        | 5mC                 | ATAAGAATAGAATGAAC/ <u>5mC</u> /GTGAAATGAATATGAAATGAATAGTA |

**Quantitative analysis of APOBEC3A: site preference specificity oligonucleotides**

Oligonucleotides used in Supplemental Figure 3A and 3B. For quantitative analysis of APOBEC3A site preference, the same core 44 bp oligonucleotide sequence for investigating the APOBEC3A substrate specificity was used. The base preceding cytosine and 5mC is underlined in the table.

**Supplemental Table 2**

| Variable Nucleotide | Oligonucleotide sequence                          |
|---------------------|---------------------------------------------------|
| C                   | ATAAGAATAGAATGAATCGTGAAATGAATATGAAATGAATAGTA      |
| 5mC                 | ATAAGAATAGAATGAAT/5mC/GTGAAATGAATATGAAATGAATAGTA  |
| 5hmC                | ATAAGAATAGAATGAAT/5hmC/GTGAAATGAATATGAAATGAATAGTA |
| 5gmC                | ATAAGAATAGAATGAAT/5gmC/GTGAAATGAATATGAAATGAATAGTA |
| 5fC                 | ATAAGAATAGAATGAAT/5fC/GTGAAATGAATATGAAATGAATAGTA  |
| 5caC                | ATAAGAATAGAATGAAT/5caC/GTGAAATGAATATGAAATGAATAGTA |

**Quantitative analysis of APOBEC3A: substrate specificity oligonucleotides**

Oligonucleotides used in Supplemental Figure 3C. For quantitative analysis of APOBEC3A substrate specificity, 44 bp oligonucleotides were used. These contained the same core sequence, but varied at one single position with either C, 5mC, 5hmC, 5gmC, 5fC or 5caC.

**Supplemental Table 3**

| Oligonucleotide Modification | APOBEC3A survival in a reaction (half life (h)) |
|------------------------------|-------------------------------------------------|
| No substrate                 | 6                                               |
| 5mC                          | 6                                               |
| 5hmC                         | 6                                               |
| 5gmC                         | 6                                               |
| 5fC                          | 1                                               |
| 5caC                         | 2                                               |

**APOBEC3A activity half life**

Activity of APOBEC3A on different single stranded oligo substrates with a single cytosine, 5mC, 5hmC, 5gmC, 5fC or 5caC was measured over time to determine the half-life of APOBEC3A.

**Supplemental Table 4**

| <b>Forward primer (5' to 3')</b> | <b>Chromosome location (Fwd)</b> | <b>Reverse primer (5' to 3')</b> | <b>Chromosome location (Rev)</b> | <b>Amplicon size, bp</b> |
|----------------------------------|----------------------------------|----------------------------------|----------------------------------|--------------------------|
| GTAAAATGTTTTGGGTAAAAGTTATATGAATG | Chr1-36100629                    | TAAAATAATCCTAACTTCTAACCTCTCTTTTC | Chr1-36097684                    | 2945                     |
| TGATGAGCGGTAGTTAGGTGAAAG         | Chr12-110944577                  | AATAAATACAATCCCAAACTATCAAATCTTC  | Chr12-110942370                  | 2207                     |
| AAAACGGAAATAGGGGTAATGATAG        | Chr12-110944120                  | AATAAATACAATCCCAAACTATCAAATCTTC  | Chr12-110942370                  | 1750                     |
| TTTTTATGATTTGTTGTGATTTGGTTATTAAG | Chr12-110943551                  | AATAAATACAATCCCAAACTATCAAATCTTC  | Chr12-110942370                  | 1181                     |
| GAGTATGGTAAAGTTGAAAATATGTAGATAAG | Chr12-110942913                  | AATAAATACAATCCCAAACTATCAAATCTTC  | Chr12-110942370                  | 543                      |

**DNA integrity assessment**

Sequences of primers used for amplicon test designed using GRCh37 as the reference genome.

**Supplemental Table 5**

| Sample Description | From [bp] | To [bp] | Average Size [bp] | Region Molarity [nmol/l] | PCR cycles |
|--------------------|-----------|---------|-------------------|--------------------------|------------|
| 0.1 ng-1           | 100       | 1000    | 397               | 18.5                     | 14         |
| 0.1 ng-2           | 100       | 1000    | 382               | 11.3                     | 14         |
| 0.5 ng-1           | 100       | 1000    | 389               | 13                       | 12         |
| 0.5 ng-2           | 100       | 1000    | 393               | 14.1                     | 12         |
| 1 ng-1             | 100       | 1000    | 397               | 12.5                     | 11         |
| 1 ng-2             | 100       | 1000    | 385               | 11.9                     | 11         |
| 10 ng-1            | 100       | 1000    | 384               | 21.8                     | 8          |
| 10 ng-2            | 100       | 1000    | 404               | 24.2                     | 8          |

**Low input library yields**

NA12878 low input libraries. The average size of the libraries, PCR yields and PCR cycles are indicated.

**Supplemental Table 6**

**A**

| Enzymes Used             | % 5mC/Total C | STDEV   |
|--------------------------|---------------|---------|
| TET2 + T4-BGT            | 0.023%        | 0.00002 |
| TET2                     | 0.018%        | 0.00001 |
| T4-BGT                   | 2.660%        | 0.00009 |
| APOBEC3A                 | 0.088%        | 0.00003 |
| TET2 + T4-BGT + APOBEC3A | 0.000%        | 0.00000 |
| Unconverted DNA          | 2.675%        | 0.00019 |

**B**

| Enzymes Used             | % dU/(dC+dU) | STDEV   |
|--------------------------|--------------|---------|
| TET2 + T4-BGT            | 0.000%       | 0.00000 |
| TET2                     | 0.000%       | 0.00000 |
| T4-BGT                   | 0.000%       | 0.00000 |
| APOBEC3A                 | 97.822%      | 0.00134 |
| TET2 + T4-BGT + APOBEC3A | 97.897%      | 0.00038 |
| Unconverted DNA          | 0.000%       | 0.00000 |

C

| Reaction           | Name  | dcaC   | dC       | dhmC  | dU      | dhmU   | dmC    | dfC   | dT       | Total C Mod |
|--------------------|-------|--------|----------|-------|---------|--------|--------|-------|----------|-------------|
| TET2+T4-BGT        | CP_01 | 32.18  | 16879.16 | 1.14  | 0.00    | 160.42 | 3.46   | 0.00  | 20870.13 | 36.79       |
| TET2+T4-BGT        | CP_01 | 28.74  | 15667.93 | 0.99  | 0.00    | 148.87 | 3.25   | 0.00  | 19403.74 | 32.99       |
| TET2+T4-BGT        | CP_02 | 13.10  | 8978.19  | 0.42  | 0.00    | 70.03  | 2.28   | 0.00  | 10453.93 | 15.80       |
| TET2+T4-BGT        | CP_02 | 14.96  | 8454.20  | 0.44  | 0.00    | 70.29  | 2.00   | 0.00  | 10149.15 | 17.40       |
| TET2               | CP_03 | 357.03 | 12724.17 | 90.39 | 0.00    | 140.66 | 2.48   | 56.20 | 16280.33 | 506.11      |
| TET2               | CP_03 | 344.88 | 12808.22 | 89.17 | 0.00    | 145.25 | 2.35   | 52.46 | 16007.79 | 488.86      |
| TET2               | CP_04 | 324.89 | 11916.66 | 85.04 | 0.00    | 137.32 | 2.12   | 53.02 | 14592.71 | 465.06      |
| TET2               | CP_04 | 314.85 | 11666.93 | 81.04 | 0.00    | 131.10 | 2.13   | 50.91 | 14427.04 | 448.93      |
| T4-BGT             | CP_05 | 0.00   | 11316.63 | 0.00  | 0.00    | 0.00   | 302.55 | 0.00  | 14609.16 | 302.55      |
| T4-BGT             | CP_05 | 0.00   | 11213.19 | 0.00  | 0.00    | 0.00   | 298.00 | 0.00  | 13994.27 | 298.00      |
| T4-BGT             | CP_06 | 0.00   | 10630.01 | 0.00  | 0.00    | 0.00   | 282.62 | 0.00  | 13686.18 | 282.62      |
| T4-BGT             | CP_06 | 0.00   | 10546.38 | 0.00  | 0.00    | 0.00   | 279.67 | 0.00  | 13725.83 | 279.67      |
| APOBEC             | CP_07 | 0.00   | 93.12    | 0.00  | 4516.74 | 0.00   | 4.00   | 0.00  | 6314.92  | 4.00        |
| APOBEC             | CP_07 | 0.00   | 97.61    | 0.00  | 4510.71 | 0.00   | 3.92   | 0.00  | 6257.50  | 3.92        |
| APOBEC             | CP_08 | 0.00   | 95.81    | 0.00  | 4140.91 | 0.00   | 3.81   | 0.00  | 5472.26  | 3.81        |
| APOBEC             | CP_08 | 0.00   | 91.56    | 0.00  | 3868.68 | 0.00   | 3.62   | 0.00  | 5220.60  | 3.62        |
| TET2+T4-BGT+APOBEC | CP_09 | 5.81   | 98.59    | 0.00  | 4519.24 | 32.06  | 0.00   | 0.00  | 6243.56  | 5.81        |
| TET2+T4-BGT+APOBEC | CP_09 | 4.22   | 98.60    | 0.00  | 4513.06 | 27.41  | 0.00   | 0.00  | 5923.75  | 4.22        |
| TET2+T4-BGT+APOBEC | CP_10 | 5.38   | 88.21    | 0.00  | 4175.77 | 27.54  | 0.00   | 0.00  | 5530.32  | 5.38        |
| TET2+T4-BGT+APOBEC | CP_10 | 4.56   | 87.56    | 0.00  | 4139.12 | 28.41  | 0.00   | 0.00  | 5567.22  | 4.56        |
| Unconverted        | CP_11 | 0.00   | 8851.73  | 0.00  | 0.00    | 0.00   | 238.75 | 0.00  | 11743.82 | 238.75      |
| Unconverted        | CP_11 | 0.00   | 8889.26  | 0.00  | 0.00    | 0.00   | 236.55 | 0.00  | 11556.56 | 236.55      |
| Unconverted        | CP_12 | 0.00   | 8253.42  | 0.00  | 0.00    | 0.00   | 219.28 | 0.00  | 10850.20 | 219.28      |
| Unconverted        | CP_12 | 0.00   | 8217.99  | 0.00  | 0.00    | 0.00   | 220.59 | 0.00  | 11047.84 | 220.59      |

### LCMS after Enzymatic Treatments

The amount of 5mC and uracil after different enzymatic treatments was investigated. The activity of individual TET2, T4-BGT and APOBEC3A enzymes or the combinations indicated on 200 ng of NA12878 DNA were analyzed using LCMS. Summaries indicating the percentage 5mC (Supplemental Table 6A) and the percentage uracil (Supplemental Table 6B) are shown. The amount of 5mC is reduced by addition of



TET2 and by the combined addition of TET2 and T4-BGT. APOBEC3A is very active as observed by the formation of uracils. There was 0.9% residual 5mC available for deamination by APOBEC3A. This residual 5mC is based upon the percentage of 5mC remaining after the TET2 + APOBEC3A reaction divided by the percentage of unconverted 5mC. Each reaction was in duplicate, and each duplicate was assayed twice using LC-MS. Supplemental Table 6C shows the complete data from this experiment.

## Supplemental Table 7

### Reference genome sequences

|                                               |               |              |              |                  |                                      |           |
|-----------------------------------------------|---------------|--------------|--------------|------------------|--------------------------------------|-----------|
| >chr1                                         | AC:CM000663.2 | gi:568336023 | LN:248956422 | rl:Chromosome    | M5:6aef897c3d6ff0c78aff06ac189178dd  | AS:GRCh38 |
| >chr2                                         | AC:CM000664.2 | gi:568336022 | LN:242193529 | rl:Chromosome    | M5:f98db672eb0993dcfdabafe2a882905c  | AS:GRCh38 |
| >chr3                                         | AC:CM000665.2 | gi:568336021 | LN:198295559 | rl:Chromosome    | M5:76635a41ea913a405ded820447d067b0  | AS:GRCh38 |
| >chr4                                         | AC:CM000666.2 | gi:568336020 | LN:190214555 | rl:Chromosome    | M5:3210fecf1eb92d5489da4346b3fddc6e  | AS:GRCh38 |
| >chr5                                         | AC:CM000667.2 | gi:568336019 | LN:181538259 | rl:Chromosome    | M5:a811b3dc9fe66af729dc0ddd7fa4f13   | AS:GRCh38 |
| hm:47309185-49591369                          |               |              |              |                  |                                      |           |
| >chr6                                         | AC:CM000668.2 | gi:568336018 | LN:170805979 | rl:Chromosome    | M5:5691468a67c7e7a7b5f2a3a683792c29  | AS:GRCh38 |
| >chr7                                         | AC:CM000669.2 | gi:568336017 | LN:159345973 | rl:Chromosome    | M5:cc044cc2256a1141212660fb07b6171e  | AS:GRCh38 |
| >chr8                                         | AC:CM000670.2 | gi:568336016 | LN:145138636 | rl:Chromosome    | M5:c67955b5f7815a9aledfaa15893d3616  | AS:GRCh38 |
| >chr9                                         | AC:CM000671.2 | gi:568336015 | LN:138394717 | rl:Chromosome    | M5:6c198acf68b5af7b9d676dfdd531b5de  | AS:GRCh38 |
| >chr10                                        | AC:CM000672.2 | gi:568336014 | LN:133797422 | rl:Chromosome    | M5:c0eeee7acfdaf31b770a509bdaa6e51a  | AS:GRCh38 |
| >chr11                                        | AC:CM000673.2 | gi:568336013 | LN:135086622 | rl:Chromosome    | M5:1511375dc2dd1b633af8cf439ae90cec  | AS:GRCh38 |
| >chr12                                        | AC:CM000674.2 | gi:568336012 | LN:133275309 | rl:Chromosome    | M5:96e414eace405d8c27a6d35ba19df56f  | AS:GRCh38 |
| >chr13                                        | AC:CM000675.2 | gi:568336011 | LN:114364328 | rl:Chromosome    | M5:a5437debe2ef9c9ef8f3ea2874ae1d82  | AS:GRCh38 |
| >chr14                                        | AC:CM000676.2 | gi:568336010 | LN:107043718 | rl:Chromosome    | M5:e0f0eccc3bcab6178c62b6211565c807  | AS:GRCh38 |
| hm:multiple                                   |               |              |              |                  |                                      |           |
| >chr15                                        | AC:CM000677.2 | gi:568336009 | LN:101991189 | rl:Chromosome    | M5:f036bd11158407596ca6bf3581454706  | AS:GRCh38 |
| >chr16                                        | AC:CM000678.2 | gi:568336008 | LN:90338345  | rl:Chromosome    | M5:db2d37c8b7d019caaf2dd64ba3a6f33a  | AS:GRCh38 |
| >chr17                                        | AC:CM000679.2 | gi:568336007 | LN:83257441  | rl:Chromosome    | M5:f9a0fb01553adb183568e3eb9d8626db  | AS:GRCh38 |
| >chr18                                        | AC:CM000680.2 | gi:568336006 | LN:80373285  | rl:Chromosome    | M5:11eeaa801f6b0e2e36a1138616b8ee9a  | AS:GRCh38 |
| >chr19                                        | AC:CM000681.2 | gi:568336005 | LN:58617616  | rl:Chromosome    | M5:85f9f4fc152c58cb7913c06d6b98573a  | AS:GRCh38 |
| hm:multiple                                   |               |              |              |                  |                                      |           |
| >chr20                                        | AC:CM000682.2 | gi:568336004 | LN:64444167  | rl:Chromosome    | M5:b18e6c531b0bd70e949a7fc20859cb01  | AS:GRCh38 |
| >chr21                                        | AC:CM000683.2 | gi:568336003 | LN:46709983  | rl:Chromosome    | M5:974dc7aec0b755b19f031418fddedf293 | AS:GRCh38 |
| hm:multiple                                   |               |              |              |                  |                                      |           |
| >chr22                                        | AC:CM000684.2 | gi:568336002 | LN:50818468  | rl:Chromosome    | M5:ac37ec46683600f808cdd41eac1d55cd  | AS:GRCh38 |
| hm:multiple                                   |               |              |              |                  |                                      |           |
| >chrX                                         | AC:CM000685.2 | gi:568336001 | LN:156040895 | rl:Chromosome    | M5:2b3a55ff7f58eb308420c8a9b11cac50  | AS:GRCh38 |
| >chrY                                         | AC:CM000686.2 | gi:568336000 | LN:57227415  | rl:Chromosome    | M5:ce3e31103314a704255f3cd90369ecce  | AS:GRCh38 |
| hm:10001-2781479,56887903-57217415            |               |              |              |                  |                                      |           |
| >chrM                                         | AC:J01415.2   | gi:l13200490 | LN:16569     | rl:Mitochondrion | M5:c68f52674c9fb33aef52dcf399755519  | AS:GRCh38 |
| tp:circular                                   |               |              |              |                  |                                      |           |
| >chr1_KI270706v1_random                       | AC:KI270706.1 | gi:568335410 | LN:175055    | rg:chr1          | rl:unlocalized                       |           |
| M5:62def1a794b3e18192863d187af956e6 AS:GRCh38 |               |              |              |                  |                                      |           |
| >chr1_KI270707v1_random                       | AC:KI270707.1 | gi:568335409 | LN:32032     | rg:chr1          | rl:unlocalized                       |           |
| M5:78135804eb15220565483b7cdd02f3be AS:GRCh38 |               |              |              |                  |                                      |           |
| >chr1_KI270708v1_random                       | AC:KI270708.1 | gi:568335408 | LN:127682    | rg:chr1          | rl:unlocalized                       |           |
| M5:1e95e047b98ed92148dd84d6c037158c AS:GRCh38 |               |              |              |                  |                                      |           |

|                                                                                                                                         |
|-----------------------------------------------------------------------------------------------------------------------------------------|
| >chr1_KI270709v1_random AC:KI270709.1 gi:568335407 LN:66860 rg:chr1 rl:unlocalized<br>M5:4e2db2933ea96aee8dab54af60ecb37d AS:GRCh38     |
| >chr1_KI270710v1_random AC:KI270710.1 gi:568335406 LN:40176 rg:chr1 rl:unlocalized<br>M5:9949f776680c6214512ee738ac5da289 AS:GRCh38     |
| >chr1_KI270711v1_random AC:KI270711.1 gi:568335405 LN:42210 rg:chr1 rl:unlocalized<br>M5:af383f98cf4492c1f1c4e750c26cbb40 AS:GRCh38     |
| >chr1_KI270712v1_random AC:KI270712.1 gi:568335404 LN:176043 rg:chr1 rl:unlocalized<br>M5:c38a0fecae6a1838a405406f724d6838 AS:GRCh38    |
| >chr1_KI270713v1_random AC:KI270713.1 gi:568335403 LN:40745 rg:chr1 rl:unlocalized<br>M5:cb78d48cc0adbc58822a1c6fe89e3569 AS:GRCh38     |
| >chr1_KI270714v1_random AC:KI270714.1 gi:568335402 LN:41717 rg:chr1 rl:unlocalized<br>M5:42f7a452b8b769d051ad738ee9f00631 AS:GRCh38     |
| >chr2_KI270715v1_random AC:KI270715.1 gi:568335401 LN:161471 rg:chr2 rl:unlocalized<br>M5:b65a8af1d7bbb7f3c77eea85423452bb AS:GRCh38    |
| >chr2_KI270716v1_random AC:KI270716.1 gi:568335400 LN:153799 rg:chr2 rl:unlocalized<br>M5:2828e63b8edc5e845bf48e75fbad2926 AS:GRCh38    |
| >chr3_GL000221v1_random AC:GL000221.1 gi:224183270 LN:155397 rg:chr3 rl:unlocalized<br>M5:3238fb74ea87ae857f9c7508d315babb AS:GRCh38    |
| >chr4_GL000008v2_random AC:GL000008.2 gi:568335399 LN:209709 rg:chr4 rl:unlocalized<br>M5:a999388c587908f80406444cebe80ba3 AS:GRCh38    |
| >chr5_GL000208v1_random AC:GL000208.1 gi:224183050 LN:92689 rg:chr5 rl:unlocalized<br>M5:aa81be49bf3fe63a79bdc6a6f279abf6 AS:GRCh38     |
| >chr9_KI270717v1_random AC:KI270717.1 gi:568335398 LN:40062 rg:chr9 rl:unlocalized<br>M5:796773alee67c988b4de887adbed9e7 AS:GRCh38      |
| >chr9_KI270718v1_random AC:KI270718.1 gi:568335397 LN:38054 rg:chr9 rl:unlocalized<br>M5:b0c463c8efa8d64442b48e936368dad5 AS:GRCh38     |
| >chr9_KI270719v1_random AC:KI270719.1 gi:568335396 LN:176845 rg:chr9 rl:unlocalized<br>M5:cd5e932cfc4c74d05bb64e2126873a3a AS:GRCh38    |
| >chr9_KI270720v1_random AC:KI270720.1 gi:568335395 LN:39050 rg:chr9 rl:unlocalized<br>M5:8c2683400a4aeeb40abff96652b9b127 AS:GRCh38     |
| >chr11_KI270721v1_random AC:KI270721.1 gi:568335394 LN:100316 rg:chr11 rl:unlocalized<br>M5:9654b5d3f36845bb9d19a6dbd15d2f22 AS:GRCh38  |
| >chr14_GL000009v2_random AC:GL000009.2 gi:568335393 LN:201709 rg:chr14 rl:unlocalized<br>M5:862f555045546733591ff7ab15bcecebe AS:GRCh38 |
| >chr14_GL000225v1_random AC:GL000225.1 gi:224183274 LN:211173 rg:chr14 rl:unlocalized<br>M5:63945c3e6962f28ffd469719a747e73c AS:GRCh38  |
| >chr14_KI270722v1_random AC:KI270722.1 gi:568335392 LN:194050 rg:chr14 rl:unlocalized<br>M5:51f46c9093929e6edc3b4dfd50d803fc AS:GRCh38  |
| >chr14_GL000194v1_random AC:GL000194.1 gi:224183213 LN:191469 rg:chr14 rl:unlocalized<br>M5:6ac8f815bf8e845bb3031b73f812c012 AS:GRCh38  |
| >chr14_KI270723v1_random AC:KI270723.1 gi:568335391 LN:38115 rg:chr14 rl:unlocalized<br>M5:74a4b480675592095fb0c577c515b5df AS:GRCh38   |

|                                                                                                                                         |
|-----------------------------------------------------------------------------------------------------------------------------------------|
| >chr14_KI270724v1_random AC:KI270724.1 gi:568335390 LN:39555 rg:chr14 rl:unlocalized<br>M5:c3fcb15dddf45f91ef7d94e2623cel3b AS:GRCh38   |
| >chr14_KI270725v1_random AC:KI270725.1 gi:568335389 LN:172810 rg:chr14 rl:unlocalized<br>M5:edc6402e58396b90b8738a5e37bf773d AS:GRCh38  |
| >chr14_KI270726v1_random AC:KI270726.1 gi:568335388 LN:43739 rg:chr14 rl:unlocalized<br>M5:fbe54a3197e2b469ccb2f4b161cfbe86 AS:GRCh38   |
| >chr15_KI270727v1_random AC:KI270727.1 gi:568335387 LN:448248 rg:chr15 rl:unlocalized<br>M5:84fe18a7bf03f3b7fc76cbac8eb583f1 AS:GRCh38  |
| >chr16_KI270728v1_random AC:KI270728.1 gi:568335386 LN:1872759 rg:chr16 rl:unlocalized<br>M5:369ff74cf36683b3066a2ca929d9c40d AS:GRCh38 |
| >chr17_GL000205v2_random AC:GL000205.2 gi:568335385 LN:185591 rg:chr17 rl:unlocalized<br>M5:458e71cd53ddldf4083dc7983a6c82c4 AS:GRCh38  |
| >chr17_KI270729v1_random AC:KI270729.1 gi:568335384 LN:280839 rg:chr17 rl:unlocalized<br>M5:2756f6ee4f5780acce31e995443508b6 AS:GRCh38  |
| >chr17_KI270730v1_random AC:KI270730.1 gi:568335383 LN:112551 rg:chr17 rl:unlocalized<br>M5:48f98ede8e28a06d241ab2e946c15e07 AS:GRCh38  |
| >chr22_KI270731v1_random AC:KI270731.1 gi:568335382 LN:150754 rg:chr22 rl:unlocalized<br>M5:8176d9a20401e8d9f01b7ca8b51d9c08 AS:GRCh38  |
| >chr22_KI270732v1_random AC:KI270732.1 gi:568335381 LN:41543 rg:chr22 rl:unlocalized<br>M5:d837bab5e416450df6e1038ae6cd0817 AS:GRCh38   |
| >chr22_KI270733v1_random AC:KI270733.1 gi:568335380 LN:179772 rg:chr22 rl:unlocalized<br>M5:f1fa05d48bb0c1f87237a28b66f0be0b AS:GRCh38  |
| >chr22_KI270734v1_random AC:KI270734.1 gi:568335379 LN:165050 rg:chr22 rl:unlocalized<br>M5:1d17410ae2569c758e6dd51616412d32 AS:GRCh38  |
| >chr22_KI270735v1_random AC:KI270735.1 gi:568335378 LN:42811 rg:chr22 rl:unlocalized<br>M5:eb6b07b73dd9a47252098ed3d9fb78b8 AS:GRCh38   |
| >chr22_KI270736v1_random AC:KI270736.1 gi:568335377 LN:181920 rg:chr22 rl:unlocalized<br>M5:2ff189f33cfa52f321accddf648c5616 AS:GRCh38  |
| >chr22_KI270737v1_random AC:KI270737.1 gi:568335376 LN:103838 rg:chr22 rl:unlocalized<br>M5:2ea8bc113a8193d1d700b584b2c5f42a AS:GRCh38  |
| >chr22_KI270738v1_random AC:KI270738.1 gi:568335375 LN:99375 rg:chr22 rl:unlocalized<br>M5:854ec525c7b6a79e7268f515b6a9877c AS:GRCh38   |
| >chr22_KI270739v1_random AC:KI270739.1 gi:568335374 LN:73985 rg:chr22 rl:unlocalized<br>M5:760fbd73515fedcc9f37737c4a722d6a AS:GRCh38   |
| >chrY_KI270740v1_random AC:KI270740.1 gi:568335373 LN:37240 rg:chrY rl:unlocalized<br>M5:69e42252aead509bf56f1ea6fda91405 AS:GRCh38     |
| >chrUn_KI270302v1 AC:KI270302.1 gi:568335372 LN:2274 rl:unplaced M5:ee6dff38036f7d03478c70717643196e AS:GRCh38                          |
| >chrUn_KI270304v1 AC:KI270304.1 gi:568335371 LN:2165 rl:unplaced M5:9423c1b46a48aa6331a77ab5c702ac9d AS:GRCh38                          |
| >chrUn_KI270303v1 AC:KI270303.1 gi:568335370 LN:1942 rl:unplaced M5:2cb746c78e0faa11e628603a4bc9bd58 AS:GRCh38                          |
| >chrUn_KI270305v1 AC:KI270305.1 gi:568335369 LN:1472 rl:unplaced M5:f9acea3395b6992cf3418b6689b98cf9 AS:GRCh38                          |
| >chrUn_KI270322v1 AC:KI270322.1 gi:568335368 LN:21476 rl:unplaced M5:7d459255d1c54369e3b64e719061a5a5<br>AS:GRCh38                      |
| >chrUn_KI270320v1 AC:KI270320.1 gi:568335367 LN:4416 rl:unplaced M5:d898b9c5a0118e76481bf5695272959e AS:GRCh38                          |

|                   |               |              |           |             |                                     |           |
|-------------------|---------------|--------------|-----------|-------------|-------------------------------------|-----------|
| >chrUn_KI270310v1 | AC:KI270310.1 | gi:568335366 | LN:1201   | rl:unplaced | M5:af6cb123af7007793bac06485a2a20e9 | AS:GRCh38 |
| >chrUn_KI270316v1 | AC:KI270316.1 | gi:568335365 | LN:1444   | rl:unplaced | M5:6adde7a9fe7bd6918f12d0f0924aa8ba | AS:GRCh38 |
| >chrUn_KI270315v1 | AC:KI270315.1 | gi:568335364 | LN:2276   | rl:unplaced | M5:ecc43e822dc011fae1fcfd9981c46e9c | AS:GRCh38 |
| >chrUn_KI270312v1 | AC:KI270312.1 | gi:568335363 | LN:998    | rl:unplaced | M5:26499f2fe4c65621fd8f4ecafbad31d7 | AS:GRCh38 |
| >chrUn_KI270311v1 | AC:KI270311.1 | gi:568335362 | LN:12399  | rl:unplaced | M5:59594f9012d8ce21ed5d1119c051a2ba | AS:GRCh38 |
| >chrUn_KI270317v1 | AC:KI270317.1 | gi:568335361 | LN:37690  | rl:unplaced | M5:cd4b1fda800f6ec9ea8001994dbf6499 | AS:GRCh38 |
| >chrUn_KI270412v1 | AC:KI270412.1 | gi:568335360 | LN:1179   | rl:unplaced | M5:7bb9612f733fb7f098be79499d46350c | AS:GRCh38 |
| >chrUn_KI270411v1 | AC:KI270411.1 | gi:568335359 | LN:2646   | rl:unplaced | M5:fc240322d91d43c04f349cc58fda3eca | AS:GRCh38 |
| >chrUn_KI270414v1 | AC:KI270414.1 | gi:568335358 | LN:2489   | rl:unplaced | M5:753e02ef3b1c590e0e3376ad2ebb5836 | AS:GRCh38 |
| >chrUn_KI270419v1 | AC:KI270419.1 | gi:568335357 | LN:1029   | rl:unplaced | M5:58455e7a788f0dc82034d1fb109f6f5c | AS:GRCh38 |
| >chrUn_KI270418v1 | AC:KI270418.1 | gi:568335356 | LN:2145   | rl:unplaced | M5:1537ec12b9c58d137a2d4cb9db896bbc | AS:GRCh38 |
| >chrUn_KI270420v1 | AC:KI270420.1 | gi:568335355 | LN:2321   | rl:unplaced | M5:bac954a897539c91982a7e3985a49910 | AS:GRCh38 |
| >chrUn_KI270424v1 | AC:KI270424.1 | gi:568335354 | LN:2140   | rl:unplaced | M5:747c8f94f34d5de4ad289bc604708210 | AS:GRCh38 |
| >chrUn_KI270417v1 | AC:KI270417.1 | gi:568335353 | LN:2043   | rl:unplaced | M5:cd26758fda713f9c96e51d541f50c2d0 | AS:GRCh38 |
| >chrUn_KI270422v1 | AC:KI270422.1 | gi:568335352 | LN:1445   | rl:unplaced | M5:3fce80eb4c0554376b591699031feb56 | AS:GRCh38 |
| >chrUn_KI270423v1 | AC:KI270423.1 | gi:568335351 | LN:981    | rl:unplaced | M5:bd5a85c001731dcccfb150db2bfe58ac | AS:GRCh38 |
| >chrUn_KI270425v1 | AC:KI270425.1 | gi:568335350 | LN:1884   | rl:unplaced | M5:665a46879bbb48294b0cfa87b61e71f6 | AS:GRCh38 |
| >chrUn_KI270429v1 | AC:KI270429.1 | gi:568335349 | LN:1361   | rl:unplaced | M5:ee8962dbef9396884f649e566b78bf06 | AS:GRCh38 |
| >chrUn_KI270442v1 | AC:KI270442.1 | gi:568335348 | LN:392061 | rl:unplaced | M5:796289c4cda40e358991f9e672490015 | AS:GRCh38 |
| >chrUn_KI270466v1 | AC:KI270466.1 | gi:568335347 | LN:1233   | rl:unplaced | M5:530b7033716a5d72dd544213c513fd12 | AS:GRCh38 |
| >chrUn_KI270465v1 | AC:KI270465.1 | gi:568335346 | LN:1774   | rl:unplaced | M5:bb1b2323414425c46531b3c3d2ae00d  | AS:GRCh38 |
| >chrUn_KI270467v1 | AC:KI270467.1 | gi:568335345 | LN:3920   | rl:unplaced | M5:db34e0dc109a4afd499b5ec6aaae9754 | AS:GRCh38 |
| >chrUn_KI270435v1 | AC:KI270435.1 | gi:568335344 | LN:92983  | rl:unplaced | M5:1655c75415b9c29e143a815f44286d05 | AS:GRCh38 |
| >chrUn_KI270438v1 | AC:KI270438.1 | gi:568335343 | LN:112505 | rl:unplaced | M5:e765271939b854dd6826aa764e930c87 | AS:GRCh38 |
| >chrUn_KI270468v1 | AC:KI270468.1 | gi:568335342 | LN:4055   | rl:unplaced | M5:0a603090f06108ed7aff75df0767b822 | AS:GRCh38 |
| >chrUn_KI270510v1 | AC:KI270510.1 | gi:568335341 | LN:2415   | rl:unplaced | M5:cd7348b3b5d9d0dfef6aed2af75ce920 | AS:GRCh38 |
| >chrUn_KI270509v1 | AC:KI270509.1 | gi:568335340 | LN:2318   | rl:unplaced | M5:1cdeb8c823d839e1d1735b5bc9a14856 | AS:GRCh38 |
| >chrUn_KI270518v1 | AC:KI270518.1 | gi:568335339 | LN:2186   | rl:unplaced | M5:3fd898b62ca859f50fb8b83e7706352b | AS:GRCh38 |
| >chrUn_KI270508v1 | AC:KI270508.1 | gi:568335338 | LN:1951   | rl:unplaced | M5:7d42a358d472b9cbdfdf30c8742473d0 | AS:GRCh38 |
| >chrUn_KI270516v1 | AC:KI270516.1 | gi:568335337 | LN:1300   | rl:unplaced | M5:1cbaaafbbf016906a5bf5886f5a0ecb7 | AS:GRCh38 |
| >chrUn_KI270512v1 | AC:KI270512.1 | gi:568335336 | LN:22689  | rl:unplaced | M5:ba1021c82d1230af856f59079e2f71b4 | AS:GRCh38 |
| >chrUn_KI270519v1 | AC:KI270519.1 | gi:568335335 | LN:138126 | rl:unplaced | M5:8d754e9c9afd904fba0a2cd577fcc9a1 | AS:GRCh38 |
| >chrUn_KI270522v1 | AC:KI270522.1 | gi:568335334 | LN:5674   | rl:unplaced | M5:070b4678e22501029c2e3297115216bc | AS:GRCh38 |
| >chrUn_KI270511v1 | AC:KI270511.1 | gi:568335333 | LN:8127   | rl:unplaced | M5:907ca34a4a2a6673632ebaf513a4c1a4 | AS:GRCh38 |
| >chrUn_KI270515v1 | AC:KI270515.1 | gi:568335332 | LN:6361   | rl:unplaced | M5:dd7527ee8e0bdb0a43ca0b2a5456c8c3 | AS:GRCh38 |

|                   |               |              |          |             |                                      |           |
|-------------------|---------------|--------------|----------|-------------|--------------------------------------|-----------|
| >chrUn_KI270507v1 | AC:KI270507.1 | gi:568335331 | LN:5353  | rl:unplaced | M5:311894d0a815eb07c5cac49da851cb4a  | AS:GRCh38 |
| >chrUn_KI270517v1 | AC:KI270517.1 | gi:568335330 | LN:3253  | rl:unplaced | M5:913440c38d95c618617ca69bb9296170  | AS:GRCh38 |
| >chrUn_KI270529v1 | AC:KI270529.1 | gi:568335329 | LN:1899  | rl:unplaced | M5:4caf890f2586daab8e4b2e2db904f05f  | AS:GRCh38 |
| >chrUn_KI270528v1 | AC:KI270528.1 | gi:568335328 | LN:2983  | rl:unplaced | M5:d75c9235f0b8c449fc4352997c56b086  | AS:GRCh38 |
| >chrUn_KI270530v1 | AC:KI270530.1 | gi:568335327 | LN:2168  | rl:unplaced | M5:04549369e1197c626669a10164613635  | AS:GRCh38 |
| >chrUn_KI270539v1 | AC:KI270539.1 | gi:568335326 | LN:993   | rl:unplaced | M5:19e3a982e67eafef39c5a3e4163f1e17  | AS:GRCh38 |
| >chrUn_KI270538v1 | AC:KI270538.1 | gi:568335325 | LN:91309 | rl:unplaced | M5:d60b72221cc7af871f2c757577e4c92a  | AS:GRCh38 |
| >chrUn_KI270544v1 | AC:KI270544.1 | gi:568335324 | LN:1202  | rl:unplaced | M5:e62a14b14467cdf48b5a236c66918f0f  | AS:GRCh38 |
| >chrUn_KI270548v1 | AC:KI270548.1 | gi:568335323 | LN:1599  | rl:unplaced | M5:866b0db8e9cf66208c2c064bd09ce0a2  | AS:GRCh38 |
| >chrUn_KI270583v1 | AC:KI270583.1 | gi:568335322 | LN:1400  | rl:unplaced | M5:b127e2e6dbe358ff192b271b8c6ee690  | AS:GRCh38 |
| >chrUn_KI270587v1 | AC:KI270587.1 | gi:568335321 | LN:2969  | rl:unplaced | M5:36be47659719f47b95caa51744aa8f70  | AS:GRCh38 |
| >chrUn_KI270580v1 | AC:KI270580.1 | gi:568335320 | LN:1553  | rl:unplaced | M5:1df30dae0f605811d927dcea58e729fc  | AS:GRCh38 |
| >chrUn_KI270581v1 | AC:KI270581.1 | gi:568335319 | LN:7046  | rl:unplaced | M5:9f26945f9f9b3f865c9e9be953cbbc1a9 | AS:GRCh38 |
| >chrUn_KI270579v1 | AC:KI270579.1 | gi:568335318 | LN:31033 | rl:unplaced | M5:fe62fb1964002717cc1b034630e89b1f  | AS:GRCh38 |
| >chrUn_KI270589v1 | AC:KI270589.1 | gi:568335317 | LN:44474 | rl:unplaced | M5:211c215414693fe0a2399cf82e707e03  | AS:GRCh38 |
| >chrUn_KI270590v1 | AC:KI270590.1 | gi:568335316 | LN:4685  | rl:unplaced | M5:e8a57f147561b361091791b9010cd28b  | AS:GRCh38 |
| >chrUn_KI270584v1 | AC:KI270584.1 | gi:568335315 | LN:4513  | rl:unplaced | M5:d93636c9d54abd013cfc0d4c01334032  | AS:GRCh38 |
| >chrUn_KI270582v1 | AC:KI270582.1 | gi:568335314 | LN:6504  | rl:unplaced | M5:6fd9804a7478d2e28160fe9f017689cb  | AS:GRCh38 |
| >chrUn_KI270588v1 | AC:KI270588.1 | gi:568335313 | LN:6158  | rl:unplaced | M5:37ffa850e69b342a8f8979bd3ffc77d4  | AS:GRCh38 |
| >chrUn_KI270593v1 | AC:KI270593.1 | gi:568335312 | LN:3041  | rl:unplaced | M5:f4a5bfa203e9e81acb640b18fb11e78e  | AS:GRCh38 |
| >chrUn_KI270591v1 | AC:KI270591.1 | gi:568335311 | LN:5796  | rl:unplaced | M5:d6af509d69835c9ac25a30086e5a4051  | AS:GRCh38 |
| >chrUn_KI270330v1 | AC:KI270330.1 | gi:568335310 | LN:1652  | rl:unplaced | M5:c2c590706a339007b00c59e0b8937e78  | AS:GRCh38 |
| >chrUn_KI270329v1 | AC:KI270329.1 | gi:568335309 | LN:1040  | rl:unplaced | M5:f023f927ae84c5cc48dc4dce11ba90f2  | AS:GRCh38 |
| >chrUn_KI270334v1 | AC:KI270334.1 | gi:568335308 | LN:1368  | rl:unplaced | M5:53afe12d1371f250a3d1de655345d374  | AS:GRCh38 |
| >chrUn_KI270333v1 | AC:KI270333.1 | gi:568335307 | LN:2699  | rl:unplaced | M5:57baf650c47bba9b3a8b7c6d0fb55ad6  | AS:GRCh38 |
| >chrUn_KI270335v1 | AC:KI270335.1 | gi:568335306 | LN:1048  | rl:unplaced | M5:eb27188639503b524d2659a23b8262ea  | AS:GRCh38 |
| >chrUn_KI270338v1 | AC:KI270338.1 | gi:568335305 | LN:1428  | rl:unplaced | M5:301ef75a6b2996d745eb3464bd352b57  | AS:GRCh38 |
| >chrUn_KI270340v1 | AC:KI270340.1 | gi:568335304 | LN:1428  | rl:unplaced | M5:56b462bac20d385cdfcde0155fe4c3a1  | AS:GRCh38 |
| >chrUn_KI270336v1 | AC:KI270336.1 | gi:568335303 | LN:1026  | rl:unplaced | M5:69ad2d85d870c8b0269434581e86e30e  | AS:GRCh38 |
| >chrUn_KI270337v1 | AC:KI270337.1 | gi:568335302 | LN:1121  | rl:unplaced | M5:16fc8d71a2662a6cfec7bdeec3d810c6  | AS:GRCh38 |
| >chrUn_KI270363v1 | AC:KI270363.1 | gi:568335301 | LN:1803  | rl:unplaced | M5:6edd17a912f391022edbc192d49f2489  | AS:GRCh38 |
| >chrUn_KI270364v1 | AC:KI270364.1 | gi:568335300 | LN:2855  | rl:unplaced | M5:6ff66a8e589ca27d93b5bac0e5b13a87  | AS:GRCh38 |
| >chrUn_KI270362v1 | AC:KI270362.1 | gi:568335299 | LN:3530  | rl:unplaced | M5:bc82401ffd9a5ae711fa0ea34da8d2f0  | AS:GRCh38 |
| >chrUn_KI270366v1 | AC:KI270366.1 | gi:568335298 | LN:8320  | rl:unplaced | M5:44a0b65b7ba6bcff37eca202e7d966ea  | AS:GRCh38 |
| >chrUn_KI270378v1 | AC:KI270378.1 | gi:568335297 | LN:1048  | rl:unplaced | M5:fc13bda7dbd914c92fb7e49489d1350f  | AS:GRCh38 |
| >chrUn_KI270379v1 | AC:KI270379.1 | gi:568335296 | LN:1045  | rl:unplaced | M5:3218bef25946cd95de585dfc7750f63b  | AS:GRCh38 |
| >chrUn_KI270389v1 | AC:KI270389.1 | gi:568335295 | LN:1298  | rl:unplaced | M5:2c9b08c57c27e714d4d5259fd91b6983  | AS:GRCh38 |
| >chrUn_KI270390v1 | AC:KI270390.1 | gi:568335294 | LN:2387  | rl:unplaced | M5:7a64d89ea14990c16d20f4d6e7283e10  | AS:GRCh38 |
| >chrUn_KI270387v1 | AC:KI270387.1 | gi:568335293 | LN:1537  | rl:unplaced | M5:22a12462264340c25e912b8485cdfa91  | AS:GRCh38 |

|                   |               |              |           |             |                                     |           |
|-------------------|---------------|--------------|-----------|-------------|-------------------------------------|-----------|
| >chrUn_KI270395v1 | AC:KI270395.1 | gi:568335292 | LN:1143   | rl:unplaced | M5:7c03ca4756c1620f318fb189214388d8 | AS:GRCh38 |
| >chrUn_KI270396v1 | AC:KI270396.1 | gi:568335291 | LN:1880   | rl:unplaced | M5:9069bed3c2efe7cc87272d619ad5816f | AS:GRCh38 |
| >chrUn_KI270388v1 | AC:KI270388.1 | gi:568335290 | LN:1216   | rl:unplaced | M5:76f9f3315fa4b831e93c36cd88196480 | AS:GRCh38 |
| >chrUn_KI270394v1 | AC:KI270394.1 | gi:568335289 | LN:970    | rl:unplaced | M5:d5171e863a3d8f832f0559235987b1e5 | AS:GRCh38 |
| >chrUn_KI270386v1 | AC:KI270386.1 | gi:568335288 | LN:1788   | rl:unplaced | M5:b9b1baaa7abf206f6b70cf31654172db | AS:GRCh38 |
| >chrUn_KI270391v1 | AC:KI270391.1 | gi:568335287 | LN:1484   | rl:unplaced | M5:1fa5cf03b3eac0f1b4a64948fd09de53 | AS:GRCh38 |
| >chrUn_KI270383v1 | AC:KI270383.1 | gi:568335286 | LN:1750   | rl:unplaced | M5:694d75683e4a9554bcc1291edbcaee43 | AS:GRCh38 |
| >chrUn_KI270393v1 | AC:KI270393.1 | gi:568335285 | LN:1308   | rl:unplaced | M5:3724e1d70677d6b5c4bcf17fd40da111 | AS:GRCh38 |
| >chrUn_KI270384v1 | AC:KI270384.1 | gi:568335284 | LN:1658   | rl:unplaced | M5:b06e44ea15d0a57618d6ca7d2e6ac5d2 | AS:GRCh38 |
| >chrUn_KI270392v1 | AC:KI270392.1 | gi:568335283 | LN:971    | rl:unplaced | M5:59b3ca8de65fb171683f8a06d3b4bf0d | AS:GRCh38 |
| >chrUn_KI270381v1 | AC:KI270381.1 | gi:568335282 | LN:1930   | rl:unplaced | M5:2a9297cfd3b3807195ab9ad07e775d99 | AS:GRCh38 |
| >chrUn_KI270385v1 | AC:KI270385.1 | gi:568335281 | LN:990    | rl:unplaced | M5:112a8b1df94ef0498a0bfe2d2ea5cc23 | AS:GRCh38 |
| >chrUn_KI270382v1 | AC:KI270382.1 | gi:568335280 | LN:4215   | rl:unplaced | M5:e7085cdcee6ad62f359744e13d3209fc | AS:GRCh38 |
| >chrUn_KI270376v1 | AC:KI270376.1 | gi:568335279 | LN:1136   | rl:unplaced | M5:59e8fc80b78d62325082334b43dffdba | AS:GRCh38 |
| >chrUn_KI270374v1 | AC:KI270374.1 | gi:568335278 | LN:2656   | rl:unplaced | M5:dbc92c9a92e558946e58b4909ec95dd5 | AS:GRCh38 |
| >chrUn_KI270372v1 | AC:KI270372.1 | gi:568335277 | LN:1650   | rl:unplaced | M5:53a9d5e8fd28bce5da5efcfd9114dbf2 | AS:GRCh38 |
| >chrUn_KI270373v1 | AC:KI270373.1 | gi:568335276 | LN:1451   | rl:unplaced | M5:b174fe53be245a840cd6324e39b88ced | AS:GRCh38 |
| >chrUn_KI270375v1 | AC:KI270375.1 | gi:568335275 | LN:2378   | rl:unplaced | M5:d678250c97e9b94aa390fa46e70a6d83 | AS:GRCh38 |
| >chrUn_KI270371v1 | AC:KI270371.1 | gi:568335274 | LN:2805   | rl:unplaced | M5:a0af3d778dfef7963e8e6d84c0c54fba | AS:GRCh38 |
| >chrUn_KI270448v1 | AC:KI270448.1 | gi:568335273 | LN:7992   | rl:unplaced | M5:0f40827c265cb813b6e723da6c9b926b | AS:GRCh38 |
| >chrUn_KI270521v1 | AC:KI270521.1 | gi:568335272 | LN:7642   | rl:unplaced | M5:af5bef7cefec7bd7efa729ac6c5be088 | AS:GRCh38 |
| >chrUn_GL000195v1 | AC:GL000195.1 | gi:224183229 | LN:182896 | rl:unplaced | M5:5d9ec007868d517e73543b005ba48535 | AS:GRCh38 |
| >chrUn_GL000219v1 | AC:GL000219.1 | gi:224183268 | LN:179198 | rl:unplaced | M5:f977edd13bac459cb2ed4a5457dba1b3 | AS:GRCh38 |
| >chrUn_GL000220v1 | AC:GL000220.1 | gi:224183269 | LN:161802 | rl:unplaced | M5:fc35de963c57bf7648429e6454f1c9db | AS:GRCh38 |
| >chrUn_GL000224v1 | AC:GL000224.1 | gi:224183273 | LN:179693 | rl:unplaced | M5:d5b2fc04f6b41b212a4198a07f450e20 | AS:GRCh38 |
| >chrUn_KI270741v1 | AC:KI270741.1 | gi:568335271 | LN:157432 | rl:unplaced | M5:86eaea8a15a3950e37442eaaa5c9dc92 | AS:GRCh38 |
| >chrUn_GL000226v1 | AC:GL000226.1 | gi:224183275 | LN:15008  | rl:unplaced | M5:1c1b2cd1fccbc0a99b6a447fa24d1504 | AS:GRCh38 |
| >chrUn_GL000213v1 | AC:GL000213.1 | gi:224183287 | LN:164239 | rl:unplaced | M5:9d424fdcc98866650b58f004080a992a | AS:GRCh38 |
| >chrUn_KI270743v1 | AC:KI270743.1 | gi:568335270 | LN:210658 | rl:unplaced | M5:3b62d9d3100f530d509e4efebd98502c | AS:GRCh38 |
| >chrUn_KI270744v1 | AC:KI270744.1 | gi:568335269 | LN:168472 | rl:unplaced | M5:e90aee46b947ff8c32291a6843fde3f9 | AS:GRCh38 |
| >chrUn_KI270745v1 | AC:KI270745.1 | gi:568335268 | LN:41891  | rl:unplaced | M5:1386fe3de6f82956f2124e19353ff9c1 | AS:GRCh38 |

|                                                                                                                                |
|--------------------------------------------------------------------------------------------------------------------------------|
| >chrUn_KI270746v1 AC:KI270746.1 gi:568335267 LN:66486 rl:unplaced M5:c470486a0a858e14aa21d7866f83cc17<br>AS:GRCh38             |
| >chrUn_KI270747v1 AC:KI270747.1 gi:568335266 LN:198735 rl:unplaced M5:62375d812ece679c9fd2f3d08d4e22a4<br>AS:GRCh38            |
| >chrUn_KI270748v1 AC:KI270748.1 gi:568335265 LN:93321 rl:unplaced M5:4f6c6ab005c852a4352aa33e7cc88ded<br>AS:GRCh38             |
| >chrUn_KI270749v1 AC:KI270749.1 gi:568335264 LN:158759 rl:unplaced M5:c899a7b4e911d371283f3f4058ca08b7<br>AS:GRCh38            |
| >chrUn_KI270750v1 AC:KI270750.1 gi:568335263 LN:148850 rl:unplaced M5:c022ba92f244b7dc54ea90c4eef4d554<br>AS:GRCh38            |
| >chrUn_KI270751v1 AC:KI270751.1 gi:568335262 LN:150742 rl:unplaced M5:1b758bbdee0e9ca882058d916cba9d29<br>AS:GRCh38            |
| >chrUn_KI270752v1 AC:KI270752.1 gi:568335261 LN:27745 rl:unplaced M5:e0880631848337bd58559d9b1519da63<br>AS:GRCh38             |
| >chrUn_KI270753v1 AC:KI270753.1 gi:568335260 LN:62944 rl:unplaced M5:25075fb2a1ecada67c0eb2f1fe0c7ec9<br>AS:GRCh38             |
| >chrUn_KI270754v1 AC:KI270754.1 gi:568335259 LN:40191 rl:unplaced M5:fe9e16233cecbc244f06f3acff3d03b8<br>AS:GRCh38             |
| >chrUn_KI270755v1 AC:KI270755.1 gi:568335258 LN:36723 rl:unplaced M5:4a7da6a658955bd787af8add3ccb5751<br>AS:GRCh38             |
| >chrUn_KI270756v1 AC:KI270756.1 gi:568335257 LN:79590 rl:unplaced M5:2996b120a5a5e15dab6555f0bf92e374<br>AS:GRCh38             |
| >chrUn_KI270757v1 AC:KI270757.1 gi:568335256 LN:71251 rl:unplaced M5:174c73b60b41d8a1ef0fbaa4b3bdf0d3<br>AS:GRCh38             |
| >chrUn_GL000214v1 AC:GL000214.1 gi:224183298 LN:137718 rl:unplaced M5:46c2032c37f2ed899eb41c0473319a69<br>AS:GRCh38            |
| >chrUn_KI270742v1 AC:KI270742.1 gi:568335255 LN:186739 rl:unplaced M5:2f31c013a4a8301deb8ab7ed1ca1cd99<br>AS:GRCh38            |
| >chrUn_GL000216v2 AC:GL000216.2 gi:568335254 LN:176608 rl:unplaced M5:725009a7e3f5b78752b68afa922c090c<br>AS:GRCh38            |
| >chrUn_GL000218v1 AC:GL000218.1 gi:224183305 LN:161147 rl:unplaced M5:1d708b54644c26c7e01c2dad5426d38c<br>AS:GRCh38            |
| >chrEBV AC:AJ507799.2 gi:86261677 LN:171823 rl:decoy M5:6743bd63b3ff2b5b8985d8933c53290a<br>SP:Human_herpesvirus_4 tp:circular |
| >phage_lambda J02459.1_48502                                                                                                   |
| >plasmid_puc19c L09137.2 Cloning vector pUC19c, complete sequence                                                              |
| >phage_T4 168903                                                                                                               |
| >phage_Xp12 65076                                                                                                              |
