# Supplementary material for: Enzymatic methyl sequencing detects DNA methylation at single-base resolution from picograms of DNA
Source: HighWire-hosted journal article supplement (doi:10.1101/gr.266551.120), 2021-06-17
Supplement: Supplemental_File_1.xlsx [file Supplemental_File_1.xlsx]

## Sheet: Supplemental Figure 2A
	Raw Data
	Sample Definition	fmoles 5mC	fmoles 5hmC	fmoles 5fC	fmoles 5caC	total fmoles	%5mC	%5hmC	%5fC	%5caC
	run1 2ugTET2, 200ng gDNA	5.0212	74.1999	73.8913	513.707	666.819	0.753007	11.1274	11.0812	77.0384
	run 1 4ugTET2, 200ng gDNA	6.41641	81.619	77.5117	573.989	739.537	0.867626	11.0365	10.4811	77.6147
	run 1 8ugTET2, 200ng gDNA	4.67533	54.6931	59.0116	222.723	341.103	1.37065	16.0342	17.3003	65.2949
	run 1 16ugTET2, 200ng gDNA	1.98401	32.3058	43.1068	632.448	709.845	0.279499	4.55111	6.07271	89.0967
	run 1 32ugTET2, 200ng gDNA	1.71213	3.59285	28.8519	144.452	178.609	0.958593	2.01157	16.1537	80.8762
	run 1, No enzyme, 200ng gDNA	513.74	0	0	0	513.74	100	0	0	0
	run 2 2ugTET2, 200ng gDNA	3.5261	172.199	117.048	416.755	709.528	0.496965	24.2695	16.4966	58.737
	run 2 4ugTET2, 200ng gDNA	4.09383	161.3	114.417	456.508	736.319	0.555986	21.9063	15.539	61.9987
	run 2 8ugTET2, 200ng gDNA	2.63399	102.554	93.2437	551.347	749.778	0.351303	13.6779	12.4362	73.5346
	run 2 16ugTET2, 200ng gDNA	2.57714	96.0153	93.5948	587.386	779.573	0.330583	12.3164	12.0059	75.3471
	run 2 32ugTET2, 200ng gDNA	2.54943	65.7848	75.2016	598.082	741.618	0.343766	8.87044	10.1402	80.6456
	run 2, No enzyme, 200ng gDNA	662.512	0.487273	0	0	662.999	99.9265	0.0734953	0	0
	run 3, 2ugTET2, 200ng gDNA	15.3996	77.147	74.6613	550.596	717.804	2.14538	10.7476	10.4014	76.7056
	run 3 4ugTET2, 200ng gDNA	2.13494	13.709	16.7698	263.815	296.429	0.720218	4.6247	5.65727	88.9978
	run 3 8ugTET2, 200ng gDNA	2.34192	19.7997	25.2627	593.026	640.43	0.36568	3.09162	3.94465	92.5981
	run 3 16ugTET2, 200ng gDNA	1.99802	2.6233	16.6172	274.499	295.737	0.675608	0.887036	5.6189	92.8185
	run 3 32ugTET2, 200ng gDNA	1.60891	5.52556	9.1263	648.36	664.621	0.24208	0.831385	1.37316	97.5534
	run 3, No enzyme, 200ng gDNA	3.34355	0	0	0	3.34355	100	0	0	0
	TET2 activity on NA12878 DNA
	The activity of TET2 on NA12878 DNA was investigated. 3 data sets are shown where 0 – 32 mg of TET2 was incubated with 200 ng NA12878 genomic DNA. LCMS was then used to detect the amounts of 5mC, 5hmC, 5fC and 5caC in fmoles. The corresponding percentages of total fmoles are calculated. The highest conversion of 5mC to 5caC is seen when 32 mg of TET2 is used.

## Sheet: Supplemental Figure 2B
	Arabidopsis	fmoles 5mC	fmoles 5hmC	fmoles 5fC	fmoles 5caC	Total, fmol	%5mC	%5hmC	%5fC	%5caC
	Run1	8.87926	94.461	93.4136	378.142	574.896	1.5445	16.431	16.2488	65.7757
	Run2	350.156	9.35808	27919.5	14261.3	42540.3	0.823115	0.0219981	65.6307	33.5242
	Run3	9.01519	92.6483	89.2463	2281.69	2472.6	0.364603	3.747	3.60941	92.279
	Hela	fmoles 5mC	fmoles 5hmC	fmoles 5fC	fmoles 5caC	Total, fmol	%5mC	%5hmC	%5fC	%5caC
	Run1	0.155623	11.2035	40.5383	235.426	287.323	0.054163	3.89926	14.109	81.9376
	Run2	0.151123	16.6336	37.9431	194.872	249.599	0.0605464	6.66413	15.2016	78.0737
	Run3	0.0171284	25.3614	23.8884	172.473	221.74	0.00772452	11.4374	10.7731	77.7817
	Run4	4.89691	87.936	78.5066	569.877	741.217	0.660659	11.8637	10.5916	76.884
	NA1278	fmoles 5mC	fmoles 5hmC	fmoles 5fC	fmoles 5caC	Total, fmol	%5mC	%5hmC	%5fC	%5caC
	Run1	1.98401	32.3058	43.1068	632.448	709.845	0.279499	4.55111	6.07271	89.0967
	Run2	2.57714	96.0153	93.5948	587.386	779.573	0.330583	12.3164	12.0059	75.3471
	Run3	1.99802	2.6233	16.6172	274.499	295.737	0.675608	0.887036	5.6189	92.8185
	E14	fmoles 5mC	fmoles 5hmC	fmoles 5fC	fmoles 5caC	Total, fmol	%5mC	%5hmC	%5fC	%5caC
	Run1	2.88038	6.62453	6.24154	215.118	230.864	1.24765	2.86945	2.70355	93.1794
	Run2	5.69654	66.6	62.1109	592.617	727.024	0.783542	9.16064	8.54316	81.5127
	Run3	3.30684	11.9956	8.71832	1398.1	1422.12	0.232529	0.843503	0.613052	98.3109
	3T3	fmoles 5mC	fmoles 5hmC	fmoles 5fC	fmoles 5caC	Total, fmol	%5mC	%5hmC	%5fC	%5caC
	Run1	3.22325	7.83311	8.24725	374.717	394.021	0.818041	1.98799	2.0931	95.1009
	Run2	4.95496	46.4656	44.3235	359.037	454.781	1.08953	10.2172	9.74612	78.9472
	Run3	4.68881	23.1118	21.7494	1207.06	1256.61	0.37313	1.83921	1.7308	96.0569
	XP12	fmoles 5mC	fmoles 5hmC	fmoles 5fC	fmoles 5caC	Total, fmol	%5mC	%5hmC	%5fC	%5caC
	Run1	20.2496	176.703	75.2692	193.469	465.691	4.34828	37.9443	16.1629	41.5445
	Run2	988.198	7915.64	3789.45	10134.4	22827.7	4.32895	34.6756	16.6003	44.3952
	Run3	41.4614	826.019	449.53	1781.25	3098.26	1.33822	26.6607	14.5091	57.4919
	Run4	24.6982	338.503	335.12	2350.94	3049.26	0.809974	11.1011	10.9902	77.0987
	TET2 activity on different genomic DNAs
	The activity of TET2 on different genomic DNAs was investigated.The experimental setup is described in Supplemental Figure 2B. LCMS was then used to detect the amounts of 5mC, 5hmC, 5fC and 5caC in fmoles. The corresponding percentages of total fmoles are calculated.

## Sheet: Supplemental Figure 3A
		Sample ID	Sample Condition	Time (min)	C, fmol	U, fmol	Total, fmol	%C	%U	Normalized %C	Normalized %U			Sample ID	Substrate	Time (min)	mC, fmol	T, fmol	Total, fmol	%mC	%T	Normalized %mC	Normalized %T
		RV-01	TC	0	1039.09	178.551	1217.64	85.3363	14.6637	100	0			RV-51	TmC	0	1120.38	10904.3	1120.38	9.31737	90.6826	100	0
		RV-02	TC	1	414.181	740.068	1154.25	35.8831	64.1169	42.0491	57.9509			RV-52	TmC	1	990.372	13027.7	991.372	7.06495	92.9351	75.8256	24.1744
		RV-03	TC	2	33.2011	239.866	273.067	12.1586	87.8414	14.2479	85.7521			RV-53	TmC	2	602.433	9234.41	604.433	6.12425	93.8758	65.7294	34.2706
		RV-04	TC	4	50.7256	1086.91	1137.64	4.45885	95.5412	5.22503	94.775			RV-54	TmC	4	444.883	11699.8	448.883	3.66321	96.3368	39.3159	60.6841
		RV-05	TC	8	22.9633	884.624	907.587	2.53015	97.4698	2.96492	97.0351			RV-55	TmC	8	215.965	13843.9	223.965	1.53603	98.464	16.4857	83.5143
		RV-06	TC	16	18.615	848.697	867.312	2.14629	97.8537	2.5151	97.4849			RV-56	TmC	16	58.0138	10489.1	74.0138	0.550045	99.45	5.90344	94.0966
		RV-07	TC	32	14.8623	897.299	912.161	1.62935	98.3706	1.90933	98.0907			RV-57	TmC	32	32.3954	12584.2	64.3954	0.256768	99.7432	2.75581	97.2442
		RV-08	TC	64	10.8659	812.701	823.567	1.31937	98.6806	1.54609	98.4539			RV-58	TmC	64	19.1404	12918	83.1404	0.147949	99.8521	1.58789	98.4121
		RV-09	TC	128	11.5051	996.791	1008.3	1.14104	98.859	1.33711	98.6629			RV-59	TmC	128	10.4345	11688.7	138.434	0.0891904	99.9108	0.957249	99.0428
		RV-10	TC	256	5.0506	492.161	497.211	1.01579	98.9842	1.19033	98.8097			RV-60	TmC	256	7.12983	15467.5	263.13	0.0460745	99.9539	0.494501	99.5055
		RV-11	UCG	0	1104.24	1261.05	2365.29	46.685	53.315	100	0			RV-61	UmC	0	1738.5	16286.6	1738.5	9.64489	90.3551	100	0
		RV-12	UCG	1	230.147	1179.09	1409.24	16.3313	83.6687	34.9819	65.0181			RV-62	UmC	1	1388.5	16991.4	1389.5	7.55443	92.4456	78.3258	21.6742
		RV-13	UCG	2	89.6857	1441.23	1530.92	5.8583	94.1417	12.5486	87.4514			RV-63	UmC	2	1048.36	17506.8	1050.36	5.64997	94.35	58.5799	41.4201
		RV-14	UCG	4	33.2785	1241.21	1274.48	2.61114	97.3889	5.59309	94.4069			RV-64	UmC	4	598.664	16422.2	602.664	3.51722	96.4828	36.4672	63.5328
		RV-15	UCG	8	21.0083	1257	1278	1.64383	98.3562	3.52111	96.4789			RV-65	UmC	8	187.751	12127.9	195.751	1.52449	98.4755	15.8062	84.1938
		RV-16	UCG	16	16.9854	1677.86	1694.85	1.00218	98.9978	2.14668	97.8533			RV-66	UmC	16	93.9377	15238.4	109.938	0.612677	99.3873	6.35235	93.6477
		RV-17	UCG	32	14.0222	1623.25	1637.27	0.856439	99.1436	1.83451	98.1655			RV-67	UmC	32	50.3889	15023.8	82.3889	0.334272	99.6657	3.4658	96.5342
		RV-18	UCG	64	12.155	1917.57	1929.73	0.629882	99.3701	1.34922	98.6508			RV-68	UmC	64	38.6005	19125.2	102.6	0.201423	99.7986	2.0884	97.9116
		RV-19	UCG	128	54.8218	1858.04	1912.87	2.86595	97.1341	6.1389	93.8611			RV-69	UmC	128	21.9483	16316.2	149.948	0.134338	99.8657	1.39284	98.6072
		RV-20	UCG	256	10.3705	2168.44	2178.81	0.475972	99.524	1.01954	98.9805			RV-70	UmC	256	12.5218	11549.4	268.522	0.108302	99.8917	1.1229	98.8771
		RV-21	GC	0	1120.63	40.7966	1161.43	96.4874	3.51263	100	0			RV-71	GmC	0	1518.62	12876.3	1518.62	10.5497	89.4503	100	0
		RV-22	GC	1	261.914	61.6217	323.536	80.9537	19.0463	83.9008	16.0992			RV-72	GmC	1	1581.72	13794.3	1582.72	10.287	89.713	97.5096	2.49045
		RV-23	GC	2	397.221	154.679	551.899	71.9734	28.0266	74.5936	25.4064			RV-73	GmC	2	1829.27	16451.1	1831.27	10.0067	89.9933	94.8533	5.14673
		RV-24	GC	4	958.766	615.846	1574.61	60.8891	39.1109	63.1057	36.8943			RV-74	GmC	4	1360.78	12836	1364.78	9.58516	90.4148	90.8572	9.1428
		RV-25	GC	8	630.267	730.003	1360.27	46.334	53.666	48.0208	51.9792			RV-75	GmC	8	1141.14	12003.9	1149.14	8.68115	91.3189	82.2881	17.7119
		RV-26	GC	16	265.496	676.269	941.765	28.1913	71.8087	29.2176	70.7824			RV-76	GmC	16	1099.09	14190.2	1115.09	7.18862	92.8114	68.1406	31.8594
		RV-27	GC	32	190.886	971.847	1162.73	16.417	83.583	17.0147	82.9853			RV-77	GmC	32	1089.42	20031	1121.42	5.15813	94.8419	48.8937	51.1063
		RV-28	GC	64	6.94315	103.446	110.389	6.28972	93.7103	6.5187	93.4813			RV-78	GmC	64	390.21	12616.5	454.21	3.00007	96.9999	28.4375	71.5625
		RV-29	GC	128	19.3665	520.302	539.668	3.58858	96.4114	3.71923	96.2808			RV-79	GmC	128	146.977	10429.2	274.977	1.3897	98.6103	13.1729	86.8271
		RV-30	GC	256	5.32975	265.998	271.328	1.96432	98.0357	2.03583	97.9642			RV-80	GmC	256	138.242	14637.4	394.242	0.935608	99.0644	8.86858	91.1314
		RV-31	AC	0	1955.85	72.0757	2027.92	96.4458	3.55416	100	0			RV-91	AmC	0	1703.52	14526.6	16230.1	10.496	89.504	100	0
		RV-32	AC	1	1017.11	139.324	1156.44	87.9523	12.0477	91.1935	8.80652			RV-92	AmC	1	177.616	1750.52	1928.14	9.21177	90.7882	87.7643	12.2357
		RV-33	AC	2	1076.52	265.688	1342.21	80.2052	19.7948	83.1609	16.8391			RV-93	AmC	2	1707.76	15103.4	16811.1	10.1585	89.8415	96.7841	3.21593
		RV-34	AC	4	972.99	494.005	1466.99	66.3254	33.6746	68.7695	31.2305			RV-94	AmC	4	1712.79	15935.4	17648.2	9.70521	90.2948	92.4654	7.53456
		RV-35	AC	8	490.985	648.974	1139.96	43.0704	56.9296	44.6576	55.3424			RV-95	AmC	8	1574.91	15542.7	17117.6	9.20054	90.7995	87.6573	12.3427
		RV-36	AC	16	194.84	1367.54	1562.38	12.4708	87.5292	12.9303	87.0697			RV-96	AmC	16	1288.34	14433.3	15721.7	8.19469	91.8053	78.0742	21.9258
		RV-37	AC	32	42.5664	1.96066	44.5271	95.5967	4.40329	99.1196	0.880421			RV-97	AmC	32	940.689	12999.4	13940.1	6.74809	93.2519	64.2918	35.7082
		RV-38	AC	64	36.5865	967.761	1004.35	3.64281	96.3572	3.77705	96.2229			RV-98	AmC	64	549.75	11099.5	11649.3	4.71917	95.2808	44.9614	55.0386
		RV-39	AC	128	1.37872	36.7709	38.1496	3.61399	96.386	3.74717	96.2528			RV-99	AmC	128	280.722	10657.8	10938.6	2.56635	97.4336	24.4507	75.5493
		RV-40	AC	256	16.8166	1097.56	1114.38	1.50906	98.4909	1.56467	98.4353			RV-100	AmC	256	187.932	14075.1	14263.1	1.31762	98.6824	12.5535	87.4465
		RV-41	mCC	0	1753.91	150.36	1904.27	92.1041	7.8959	100	0			RV-81	CmC	0	1632.59	14303.7	15936.3	10.2445	89.7555	100	0
		RV-42	mCC	1	663.812	407.423	1071.23	61.9669	38.0331	67.2792	32.7208			RV-82	CmC	1	1596.11	15952	17548.1	9.09566	90.9043	88.7858	11.2142
		RV-43	mCC	2	450.696	532.166	982.862	45.8555	54.1445	49.7865	50.2135			RV-83	CmC	2	1435.89	15908.9	17344.8	8.2785	91.7215	80.8092	19.1908
		RV-44	mCC	4	229.948	677.379	907.326	25.3434	74.6566	27.5161	72.4839			RV-84	CmC	4	975.142	13983.3	14958.5	6.519	93.481	63.6342	36.3658
		RV-45	mCC	8	131.844	1174.52	1306.36	10.0925	89.9075	10.9577	89.0423			RV-85	CmC	8	678.359	13840.7	14519.1	4.67219	95.3278	45.6068	54.3932
		RV-46	mCC	16	36.3573	812.076	848.433	4.28522	95.7148	4.65259	95.3474			RV-86	CmC	16	451.906	15445.5	15897.4	2.84264	97.1574	27.748	72.252
		RV-47	mCC	32	1.81019	32.0776	33.8878	5.3417	94.6583	5.79964	94.2004			RV-87	CmC	32	232.701	15483.6	15716.3	1.48063	98.5194	14.453	85.547
		RV-48	mCC	64	25.1445	909.08	934.224	2.69149	97.3085	2.92222	97.0778			RV-88	CmC	64	127.452	17238.5	17366	0.733917	99.2661	7.16401	92.836
		RV-49	mCC	128	0.508541	26.8428	27.3513	1.85929	98.1407	2.01869	97.9813			RV-89	CmC	128	49.1592	12328.8	12378	0.39715	99.6029	3.87671	96.1233
		RV-50	mCC	256	13.3821	1120.83	1134.21	1.17986	98.8201	1.28101	98.719			RV-90	CmC	256	60.4269	25655.6	25716	0.234978	99.765	2.2937	97.7063
		APOBEC3A substrate specificity
		Time course reactions with 0.2 µM APOBEC3A and 2 µM single-stranded oligonucleotide substrate containing either a cytosine or 5mC preceded by different bases. The experimental setup is described in Supplemental Figure 3A and the oligonucleotide sequences are in Supplemental Table 1. LCMS was used to detect fmoles of either C or U for the cytosine continaing oligonucleotides and either mC or T for…

## Sheet: Supplemental Figure 3C
	units=fmoles
dC									dC									dC
	Name	Time(min)	dC	dU	dU/(dC+dU)	dT	(dC+dU)/dT			Name	Time(min)	dC	dU	dU/(dC+dU)	dT	(dC+dU)/dT			Name	Time(min)	dC	dU	dU/(dC+dU)	dT	(dC+dU)/dT
	ROV_01	0	1515.63	0	0	16181.6	0.0937			ROV_dC_01	0	1448.98	0	0	12613.9	0.1149			ROV_01	0	1965.52	0.563721	0.0003	20122.7	0.0977
	ROV_01	0	1470.28	0	0	16182.8	0.0909			ROV_dC_01	0	1446.79	0	0	12747.5	0.1135			ROV_01	0	2018.21	0.549	0.0003	19629.5	0.1028
	ROV_02	1	753.599	876.915	0.5378	16160.2	0.1009			ROV_dC_02	0.25	848.525	617.194	0.4211	12901	0.1136			ROV_02	0.25	1136.16	143.474	0.1121	12023.7	0.1064
	ROV_02	1	758.982	857.375	0.5304	14919.5	0.1083			ROV_dC_02	0.25	862.251	610.982	0.4147	12799.1	0.1151			ROV_02	0.25	1100.58	138.662	0.1119	11629.5	0.1066
	ROV_03	2	170.705	1421.76	0.8928	15305.5	0.104			ROV_dC_03	0.5	518.938	876.475	0.6281	13208.7	0.1056			ROV_03	0.5	984.876	278.058	0.2202	11778.7	0.1072
	ROV_03	2	167.711	1378.06	0.8915	14742.7	0.1049			ROV_dC_03	0.5	508.739	878.318	0.6332	13368.5	0.1038			ROV_03	0.5	965.634	271.284	0.2193	11521	0.1074
	ROV_04	4	84.8384	1340.42	0.9405	14291.4	0.0997			ROV_dC_04	1	134.737	1143.39	0.8946	13418.2	0.0953			ROV_04	1	663.898	674.38	0.5039	12885.2	0.1039
	ROV_04	4	82.0442	1315.03	0.9413	14116.4	0.099			ROV_dC_04	1	133.912	1139.27	0.8948	13542.4	0.094			ROV_04	1	654.877	668.101	0.505	12539.9	0.1055
	ROV_05	8	38.825	1254.34	0.97	13052.9	0.0991			ROV_dC_05	2	40.1014	1113.47	0.9652	12320.1	0.0936			ROV_05	2	167.626	974.18	0.8532	11663.4	0.0979
	ROV_05	8	38.7743	1243.49	0.9698	12982.5	0.0988			ROV_dC_05	2	37.7961	1085.99	0.9664	12136.6	0.0926			ROV_05	2	166.063	961.862	0.8528	11505.3	0.098
	ROV_06	16	28.2199	1462.78	0.9811	15058.6	0.099			ROV_dC_06	4	13.5334	1112.43	0.988	12439.4	0.0905			ROV_06	4	81.4656	1074.17	0.9295	11827.4	0.0977
	ROV_06	16	28.5792	1445.15	0.9806	14797	0.0996			ROV_dC_06	4	13.9786	1111.26	0.9876	12204.2	0.0922			ROV_06	4	80.4824	1057.33	0.9293	11691.6	0.0973
	ROV_07	30	30.0959	1861.63	0.9841	18849.1	0.1004			ROV_dC_07	8	2.8457	1142.95	0.9975	12780.9	0.0896			ROV_07	8	38.8889	1016.37	0.9631	10665	0.0989
	ROV_07	30	27.0685	1838.94	0.9855	18585.2	0.1004			ROV_dC_07	8	2.77785	1144.47	0.9976	12847.2	0.0893			ROV_07	8	37.3356	984.755	0.9635	10675.1	0.0957
	ROV_08	60	10.6914	1309.76	0.9919	13577.7	0.0973			ROV_dC_08	16	0	1089.17	1	11771.4	0.0925			ROV_08	16	20.8409	985.021	0.9793	10739.7	0.0937
	ROV_08	60	10.7583	1305.7	0.9918	13598.8	0.0968			ROV_dC_08	16	0	1072.9	1	11587.5	0.0926			ROV_08	16	20.7614	969.838	0.979	10855.6	0.0913
	ROV_09	120	2.78592	1308.28	0.9979	13407.6	0.0978			ROV_dC_09	30	0	1125.62	1	12640	0.0891			ROV_09	30	9.08748	882.987	0.9898	9440.08	0.0945
	ROV_09	120	2.93034	1278.82	0.9977	13248	0.0968			ROV_dC_09	30	0	1135.37	1	12675.4	0.0896			ROV_09	30	9.10899	882.245	0.9898	9508.48	0.0937
	ROV_10	220	2.08201	1141.52	0.9982	12380.6	0.0924			ROV_dC_10	60	0	1252.32	1	14171.5	0.0884			ROV_10	60	7.5712	1047.98	0.9928	11013.2	0.0958
	ROV_10	220	2.27678	1160.97	0.998	12497	0.0931			ROV_dC_10	60	0	1244.59	1	13978.8	0.089			ROV_10	60	6.86081	1037.57	0.9934	10915	0.0957
	ROV_11	390	0	1091.6	1	11542.7	0.0946			ROV_dC_11	120	0	1048.12	1	11585.5	0.0905			ROV_11	120	0	953.309	1	10205.7	0.0934
	ROV_11	390	0	1095.75	1	11524.9	0.0951			ROV_dC_11	120	0	1043.9	1	11668.9	0.0895			ROV_11	120	0	941.448	1	9943.77	0.0947
										ROV_dC_12	240	0	1101.88	1	12408.4	0.0888			ROV_12	240	0	851.457	1	8918.24	0.0955
										ROV_dC_12	240	0	1093.39	1	12455.2	0.0878			ROV_12	240	0	868.261	1	8968.87	0.0968
d5mC									d5mC
	Name	Time(min)	dmC	dT	dmC/(dmC+dT)					Name	Time(min)	dmC	dT	dmC/(dmC+dT)
	ROV_01	0	1101.65	11496.8	0.0874					ROV_dmC_01	0	28.735	15548.3	0.0713
	ROV_01	0	1062.4	10993.5	0.0881					ROV_dmC_01	0	28.639	15517.5	0.0709
	ROV_02	1	686.214	12108.5	0.0536					ROV_dmC_02	0.5	597.497	9566.14	0.0588
	ROV_02	1	668.937	11770.5	0.0538					ROV_dmC_02	0.5	592.497	9488.05	0.0588
	ROV_03	2	328.829	11943	0.0268					ROV_dmC_03	1	432.745	9137.53	0.0452
	ROV_03	2	323.807	11827.4	0.0266					ROV_dmC_03	1	431.879	9139.45	0.0451
	ROV_04	4	145.518	11289.5	0.0127					ROV_dmC_04	2	218.834	9552.31	0.0224
	ROV_04	4	142.331	10940.7	0.0128					ROV_dmC_04	2	215.735	9639.99	0.0219
	ROV_05	8	101.551	11191.6	0.009					ROV_dmC_05	4	102.577	9826.53	0.0103
	ROV_05	8	100.74	11174.6	0.0089					ROV_dmC_05	4	102.893	9782.18	0.0104
	ROV_06	16	79.8602	11978.6	0.0066					ROV_dmC_06	8	69.3423	9890.83	0.007
	ROV_06	16	77.6569	11609.3	0.0066					ROV_dmC_06	8	68.9753	9744.81	0.007
	ROV_07	30	34.4636	10912.4	0.0031					ROV_dmC_07	16	48.0182	8649.35	0.0055
	ROV_07	30	34.6128	11023.4	0.0031					ROV_dmC_07	16	47.6751	8590.62	0.0055
	ROV_08	60	51.449	10328.1	0.005					ROV_dmC_08	30	38.3666	9265.56	0.0041
	ROV_08	60	51.8982	10358	0.005					ROV_dmC_08	30	38.5454	9272.11	0.0041
	ROV_09	120	25.1754	11359.6	0.0022					ROV_dmC_09	60	26.2331	8922.38	0.0029
	ROV_09	120	24.827	11249.3	0.0022					ROV_dmC_09	60	26.305	9058.82	0.0029
	ROV_10	220	19.2025	10684	0.0018					ROV_dmC_10	120	17.6421	7986.12	0.0022
	ROV_10	220	18.9299	10571.3	0.0018					ROV_dmC_10	120	17.5246	7909.72	0.0022
										ROV_dmC_11	240	19.7473	9094.3	0.0022
										ROV_dmC_11	240	19.7538	9056.95	0.0022
										ROV_dmC_12	480	614.168	7999.19	0.0018
										ROV_dmC_12	480	612.13	8024.95	0.0018
d5fC									d5fC									d5fC									d5fC
	Name	Time(min)	dfU	dfC	dfU/(dfU+dfC)	dT	(dfU+dfC)/dT			Name	Time(min)	dfU	dfC	dfU/(dfU+dfC)	dT	(dfU+dfC)/dT			Name	Time(min)	dfU	dfC	dfU/(dfU+dfC)	dT	(dfU+dfC)/dT			Name	Time(min)	dfU	dfC	dfU/(dfU+dfC)	dT	(dfU+dfC)/dT
	ROV_dfC_01	0	18.1515	1492.2	0.012	15875.3	0.0951			ROV_01	0	12.3692	1286.34	0.0095	14423.4	0.09			ROV_01	0	20.9647	1216.95	0.0169	14731.1	0.084			ROV_dfC_01	0	20.2793	1639.64	0.0122	15146.1	0.1096
	ROV_dfC_01	0	18.2573	1666.63	0.0108	15855	0.1063			ROV_01	0	12.4848	1313.4	0.0094	14596.6	0.0908			ROV_01	0	20.0793	1177.52	0.0168	14181.4	0.0844			ROV_dfC_01	0	20.2044	1617.76	0.0123	14539.4	0.1127
	ROV_dfC_02	15	22.5419	1409.84	0.0157	12970.5	0.1104			ROV_02	1	13.4497	1388.36	0.0096	15155.5	0.0925			ROV_02	1	21.0081	1203.61	0.0172	14131.3	0.0867			ROV_dfC_02	1	20.7913	1621.27	0.0127	14508.5	0.1132
	ROV_dfC_02	15	22.5389	1388.86	0.016	12781.2	0.1104			ROV_02	1	13.3469	1389.43	0.0095	15455.8	0.0908			ROV_02	1	20.7125	1156.87	0.0176	13915.8	0.0846			ROV_dfC_02	1	20.7229	1604.79	0.0127	14066.9	0.1156
	ROV_dfC_03	30	37.1719	1970.46	0.0185	19875.6	0.101			ROV_03	2	15.5511	1337.35	0.0115	15188.4	0.0891			ROV_03	2	22.055	1142.05	0.0189	13383.1	0.087			ROV_dfC_03	2	22.1876	1606.49	0.0136	14003.9	0.1163
	ROV_dfC_03	30	36.6292	1928.32	0.0186	19506.6	0.1007			ROV_03	2	15.4545	1324.44	0.0115	14910.4	0.0899			ROV_03	2	21.8409	1108.03	0.0193	13151.3	0.0859			ROV_dfC_03	2	22.109	1587.68	0.0137	13793	0.1167
	ROV_dfC_04	60	46.4967	1649.9	0.0274	17844.5	0.0951			ROV_04	4	20.9109	1399.56	0.0147	15728.2	0.0903			ROV_04	4	24.9858	1062.05	0.023	12652.3	0.0859			ROV_dfC_04	4	25.0128	1549.14	0.0159	13712.7	0.1148
	ROV_dfC_04	60	45.7712	1699.4	0.0262	17496	0.0997			ROV_04	4	21.0749	1403.89	0.0148	16214.2	0.0879			ROV_04	4	24.8918	1065.93	0.0228	12772.6	0.0854			ROV_dfC_04	4	24.9838	1534.63	0.016	13542.6	0.1152
	ROV_dfC_05	120	48.3751	1428.43	0.0328	14792.5	0.0998			ROV_05	8	30.5623	1411.94	0.0212	15661.5	0.0921			ROV_05	8	29.2949	971.036	0.0293	11740.9	0.0852			ROV_dfC_05	8	30.1722	1515.11	0.0195	13150.7	0.1175
	ROV_dfC_05	120	47.497	1320.98	0.0347	14576.8	0.0939			ROV_05	8	30.1361	1402.75	0.021	15619.2	0.0917			ROV_05	8	28.9391	958.429	0.0293	11504.3	0.0858			ROV_dfC_05	8	29.9938	1511.6	0.0195	13055.5	0.1181
	ROV_dfC_06	240	57.362	1308.8	0.042	14845	0.092			ROV_06	16	43.7894	1395.62	0.0304	16090.7	0.0895			ROV_06	16	36.3366	979.357	0.0358	11520.2	0.0882			ROV_dfC_06	16	36.8932	1496.57	0.0241	12898.7	0.1189
	ROV_dfC_06	240	57.3266	1305.4	0.0421	14568.7	0.0935			ROV_06	16	43.8837	1402.34	0.0303	15832.3	0.0913			ROV_06	16	36.1741	977.433	0.0357	11478.2	0.0883			ROV_dfC_06	16	36.7651	1507.8	0.0238	12842.5	0.1203
	ROV_dfC_07	480	66.7141	1458.45	0.0437	15749.3	0.0968			ROV_07	30	54.2082	1492.62	0.035	17052.7	0.0907			ROV_07	30	46.8117	1062.2	0.0422	12310.1	0.0901			ROV_dfC_07	30	45.0862	1580.81	0.0277	13323.4	0.122
	ROV_dfC_07	480	67.1497	1499.02	0.0429	15677.6	0.0999			ROV_07	30	54.2429	1499.96	0.0349	16817.8	0.0924			ROV_07	30	46.5086	1033.9	0.043	12284.3	0.088			ROV_dfC_07	30	44.8174	1569.05	0.0278	13155.5	0.1227
	ROV_dfC_08	1440	56.2714	1305.72	0.0413	12618.2	0.1079			ROV_08	60	77.9891	1188.32	0.0616	13558.2	0.0934			ROV_08	60	59.182	1121.68	0.0501	12958	0.0911			ROV_dfC_08	60	57.2908	1717.42	0.0323	14626.1	0.1213
	ROV_dfC_08	1440	56.686	1386.08	0.0393	12674.2	0.1138			ROV_08	60	80.6725	1197.14	0.0631	13742	0.093			ROV_08	60	58.9705	1102.61	0.0508	12792.1	0.0908			ROV_dfC_08	60	57.1162	1678.41	0.0329	14377.9	0.1207
										ROV_09	120	96.7	1189.26	0.0752	13606.2	0.0945			ROV_09	120	62.4016	1013.37	0.058	11680.1	0.0921			ROV_dfC_09	120	85.803	1507.85	0.0538	13267.2	0.1201
										ROV_09	120	98.763	1207.51	0.0756	13968.5	0.0935			ROV_09	120	63.3971	1017.25	0.0587	11816	0.0915			ROV_dfC_09	120	76.5876	1546.13	0.0472	13017.6	0.1247
										ROV_10	240	107.188	1175.93	0.0835	13926.5	0.0921			ROV_10	240	73.161	1148.98	0.0599	13055.4	0.0936			ROV_dfC_10	240	57.483	1431.76	0.0386	11952.6	0.1246
										ROV_10	240	106.794	1174.15	0.0834	13791.3	0.0929			ROV_10	240	72.2294	1139.61	0.0596	12894.6	0.094			ROV_dfC_10	240	57.4092	1474.39	0.0375	11906.8	0.1286
										ROV_11	660	125.681	1358.25	0.0847	16243.4	0.0914			ROV_11	480	68.6475	1063.23	0.0606	12107.1	0.0935			ROV_dfC_11	480	65.1037	1703.6	0.0368	13891.5	0.1273
										ROV_11	660	127.034	1348.71	0.0861	16485.1	0.0895			ROV_11	480	68.8212	1053.43	0.0613	12068.9	0.093			ROV_dfC_11	480	65.1767	1720.55	0.0365	13878	0.1287
										ROV_12	1320	102.564	1106.78	0.0848	12827.4	0.0943			ROV_12	1380	67.842	1047.17	0.0608	11803.8	0.0945			ROV_dfC_12	1380	65.1299	1734.2	0.0362	14039.7	0.1282
										ROV_12	1320	102.124	1102.77	0.0848	12746.9	0.0945			ROV_12	1380	67.5057	1040.72	0.0609	11523.9	0.0962			ROV_dfC_12	1380	65.0152	1738.63	0.036	13965.9	0.1291
d5caC
	Name	Time min	dcaC	dcaU	dcaC/(dcaC+dcaU)	dT	(dcaC+dcaU)/dT
	ROV_01	0	1540.92	7.88352	0.9949	17198.2	0.0901
	ROV_01	0	1531.06	8.10574	0.9947	16200.7	0.095
	ROV_02	60	1433.85	8.38188	0.9942	15727.8	0.0917
	ROV_02	60	1397.26	7.49752	0.9947	15270.3	0.092
	ROV_03	120	1413.85	8.21451	0.9942	15736.8	0.0904
	ROV_03	120	1405.02	8.05174	0.9943	15522.7	0.091
	ROV_04	240	1385.33	8.12285	0.9942	14733.3	0.0946
	ROV_04	240	1361.7	7.08481	0.9948	14393.7	0.0951
	ROV_05	480	1397.65	7.17306	0.9949	14996.4	0.0937
	ROV_05	480	1392.6	7.14455	0.9949	14827	0.0944
	ROV_06	1440	1279.39	6.2476	0.9951	13271.4	0.0969
	ROV_06	1440	1279.33	6.905	0.9946	13148.5	0.0978
d5hmC								d5hmC										d5hmC										d5hmC
	Name	Time (min)	dhmC	dhmU	dhmU/(dhmC+dhmU)				Name	Time (min)	dhmC	dhmU	dhmU/(dhmC+dhmU)	dT	(dhmC+dhmU)/dT				Name	Time(min)	dhmC	dhmU	dhmU/(dhmC+dhmU)	dT	(dhmC+dhmU)/dT			Name	Time(min)	dhmC	dhmU	dhmU/(dhmC+dhmU)	dT	(dhmC+dhmU)/dT
	ROV_01	0	1127.33	8.81027	0.0078				ROV_dhmC_01	0	1040.91	15.251	0.0144	21368.6	0.0494				ROV_13	0	1552.11	12.6868	0.0081	15478.7	0.1011			ROV_14	0	420.785	7.41929	0.0173	9948.65	0.043
	ROV_01	0	1127.2	8.71107	0.0077				ROV_dhmC_01	0	1019.4	15.1865	0.0147	20509.7	0.0504				ROV_13	0	1547.77	12.7524	0.0082	15490.8	0.1007			ROV_14	0	420.181	7.49298	0.0175	10109.6	0.0423
	ROV_02	2	1323.72	10.4554	0.0078				ROV_dhmC_02	15	873.684	100.873	0.1035	18518.5	0.0526				ROV_14	1	1331.91	12.7376	0.0095	13199.6	0.1019			ROV_15	1	384.471	7.11232	0.0182	9124.85	0.0429
	ROV_02	2	1302.49	10.9611	0.0083				ROV_dhmC_02	15	863.395	99.5304	0.1034	18011.2	0.0535				ROV_14	1	1314.39	12.6487	0.0095	12847.2	0.1033			ROV_15	1	382.65	7.17694	0.0184	9164.2	0.0425
	ROV_03	15	1154.16	65.1274	0.0534				ROV_dhmC_03	30	877.714	172.216	0.164	19006.2	0.0552				ROV_15	2	1442.49	16.517	0.0113	13958.2	0.1045			ROV_16	2	395.7	8.76459	0.0217	9299.12	0.0435
	ROV_03	15	1145.75	65.7812	0.0543				ROV_dhmC_03	30	849.525	163.749	0.1616	18431.1	0.055				ROV_15	2	1473.35	16.4451	0.011	14007.1	0.1064			ROV_16	2	387.781	8.95794	0.0226	9257.03	0.0429
	ROV_04	30	1132.98	121.692	0.097				ROV_dhmC_04	120									ROV_16	4	1471.59	23.6485	0.0158	13629.8	0.1097			ROV_17	4	528.334	17.4093	0.0319	12589.4	0.0433
	ROV_04	30	1128.12	119.781	0.096				ROV_dhmC_04	120									ROV_16	4	1505.63	22.6886	0.0148	13799.2	0.1108			ROV_17	4	536.636	17.8824	0.0322	12656.4	0.0438
	ROV_05	60	933.847	193.488	0.1716				ROV_dhmC_05	240	717.002	351.651	0.3291	17885.2	0.0598				ROV_17	8	1556.17	40.629	0.0254	14318.1	0.1115			ROV_18	8	503.197	24.8932	0.0471	12025.8	0.0439
	ROV_05	60	928.388	193.488	0.1725				ROV_dhmC_05	240	691.95	335.751	0.3267	17541.6	0.0586				ROV_17	8	1580.36	41.7531	0.0257	14289.2	0.1135			ROV_18	8	506.877	24.2223	0.0456	12094.5	0.0439
	ROV_06	120	864.16	305.295	0.2611				ROV_dhmC_06	480	676.064	436.526	0.3924	18243.9	0.061				ROV_18	16	1580.48	64.9637	0.0395	13896.5	0.1184			ROV_19	16	469.861	38.6835	0.0761	11282.5	0.0451
	ROV_06	120	872.142	306.389	0.26				ROV_dhmC_06	480	642.212	417.181	0.3938	17701.2	0.0598				ROV_18	16	1575.8	65.8085	0.0401	14063.4	0.1167			ROV_19	16	459.225	36.6999	0.074	11144.3	0.0445
	ROV_07	240	700.999	474.261	0.4035				ROV_dhmC_07	1440	459.502	403.047	0.4673	13764.8	0.0627				ROV_19	30	1486.05	106.775	0.067	13566	0.1174			ROV_20	30	421.166	55.6463	0.1167	10430.9	0.0457
	ROV_07	240	686.745	467.667	0.4051				ROV_dhmC_07	1440	449.742	395.819	0.4681	13588.6	0.0622				ROV_19	30	1480.88	108.241	0.0681	13503	0.1177			ROV_20	30	418.192	55.3603	0.1169	10343	0.0458
	ROV_08	480	624.94	602.668	0.4909														ROV_20	60	1426.82	168.2	0.1055	12695.2	0.1256			ROV_21	60	525.415	122.559	0.1891	13856.9	0.0468
	ROV_08	480	621.506	596.187	0.4896														ROV_20	60	1413.72	166.676	0.1055	12619.7	0.1252			ROV_21	60	523.679	121.388	0.1882	13807.6	0.0467
	ROV_09	1440	448.058	597.341	0.5714														ROV_21	120	1472.59	309.23	0.1735	14977.3	0.119			ROV_22	120	524.602	215.461	0.2911	14468.3	0.0512
	ROV_09	1440	452.838	603.355	0.5713														ROV_21	120	1407.59	309.219	0.1801	14911.9	0.1151			ROV_22	120	521.075	217.502	0.2945	14392.7	0.0513
		.																	ROV_22	240	1355.6	472.852	0.2586	16167.1	0.1131			ROV_23	240	372.138	255.301	0.4069	11421.6	0.0549
																			ROV_22	240	1348.67	474.779	0.2604	16337.8	0.1116			ROV_23	240	374.588	256.645	0.4066	11484.8	0.055
																			ROV_23	510	1077.35	500.123	0.317	13803.2	0.1143			ROV_24	510	508.281	444.546	0.4666	16809.5	0.0567
																			ROV_23	510	1082.26	500.525	0.3162	13722.1	0.1153			ROV_24	510	509.361	442.998	0.4652	16771.6	0.0568
																			ROV_24	1240	1167.23	615.944	0.3454	15224.2	0.1171			ROV_25	1200	522.858	466.686	0.4716	17526.6	0.0565
d5gmC																			ROV_24	1240	1138.84	619.374	0.3523	15299	0.1149			ROV_25	1200	528.114	476.997	0.4746	17517.4	0.0574
	A3A incubation time h	dgmC	dG	dT	dA		Time	dgmC	dgmU
	0	0.036	0.397	0.507	1		0 min	1	0
	1	0.036	0.399	0.51	1		60 min	1	0
	2	0.036	0.398	0.509	1		120 min	1	0
	4	0.036	0.397	0.508	1		240 min	1	0
	8	0.035	0.397	0.507	1		480 min	0.9722	0.0278
	20	0.036	0.398	0.509	1		1200 min	1	0
APOBEC3A substrate specificity
Time course reactions of 0.2 µM APOBEC3A and 2 µM single-stranded oligonucleotides containing either cytosine, 5mC, 5hmC, 5gmC, 5fC, 5caC (Supplemental Table 2). The experimental setup is described in Supplemental Figure 3C. LCMS was used to detect nucloside content for each of the oligonucleotides before and after APOBEC3A incubation. Corresponding percentages were calculated.
